# Supplementary material for: Genome-wide identification and expression pattern analysis of lipoxygenase gene family in turnip (Brassica rapa L. subsp. rapa)
Source: PeerJ. 2022 Jul 22;10:e13746. doi: 10.7717/peerj.13746 (PMC9310782; doi:10.7717/peerj.13746)
Supplement: Supplemental Information 2 [file peerj-10-13746-s002.xlsx]

## Sheet: genes.TMM.EXPR
Table.S1 Expression matrix of transcriptome data
	mock control	100µM MeJA spray	100mM NaCl watering	100µM MeJA spray + 100mM NaCl watering
A05p39270.1_BraTUA	0.014	0	0	0
A04p06000.1_BraTUA	0.610333	1.33433	0.34	0.444333
A02p07320.1_BraTUA	2.27133	0	1.81633	1.565
A05p28950.1_BraTUA	0	0	0	0.0146667
A05p32820.1_BraTUA	0	9.06333	0.009	0.0236667
A03p59440.1_BraTUA	7.03133	50.148	7.11	8.10267
A05p05480.1_BraTUA	50.0603	0.025	66.958	57.9973
A10p19550.1_BraTUA	0.048	0	0.023	0
A03p19060.1_BraTUA	0	2.80467	0	0
A07p07680.1_BraTUA	3.79867	28.76	2.61333	2.06767
A07p24580.1_BraTUA	45.2447	142.694	45.412	31.2647
A07p40890.1_BraTUA	49.5103	0.146667	471.544	429.982
A01p46480.1_BraTUA	0.125333	1.44233	0.130333	0.102667
A03p39720.1_BraTUA	1.10333	9.68267	0.486	1.15267
A01p03930.1_BraTUA	9.82467	0	12.0833	10.8093
A02p47250.1_BraTUA	0	19.238	0	0
A05p25710.1_BraTUA	18.8147	2.171	13.227	17.4233
A09p49750.1_BraTUA	2.54067	2.67267	3.37667	2.53133
A04p19580.1_BraTUA	2.90933	0.174333	2.33	4.54567
A09p17940.1_BraTUA	1.75033	2.992	0.356	0.317
A01p14730.1_BraTUA	1.57667	2.33567	1.26333	1.60133
A06p10250.1_BraTUA	2.32133	2.07333	2.47267	1.98067
A04p06380.1_BraTUA	0.659333	0.103333	1.7	4.55233
A09p49640.1_BraTUA	0.737333	3.82267	0.330667	0.338667
A03p23370.1_BraTUA	3.06067	0	4.28333	4.42367
A03p37550.1_BraTUA	0	0	0.0673333	0.0826667
A09p41020.1_BraTUA	0.057	35.7063	0.0566667	0.034
A03p49550.1_BraTUA	50.421	0	32.802	43.0117
A09p39490.1_BraTUA	0	0	0	0
A09p40750.1_BraTUA	0	28.4453	0	0
A09p08450.1_BraTUA	25.5177	0	35.4687	38.8137
A09p26810.1_BraTUA	0	1.403	0	0
A01p15540.1_BraTUA	1.20267	0	1.45933	1.79433
A02p37560.1_BraTUA	0	4.072	0.052	0
A01p16250.1_BraTUA	4.47733	153.212	4.34133	3.29633
A02p00330.1_BraTUA	198.596	59.2793	291.263	181.812
A08p11160.1_BraTUA	62.3237	14.6537	68.186	69.1687
A07p13030.1_BraTUA	11.3327	0.988667	13.507	13.896
A10p16660.1_BraTUA	0.173	0.295667	0.552333	0.153
A09p11030.1_BraTUA	0.180667	0.0426667	0.065	0.317333
A07p41290.1_BraTUA	0	0	0.042	0
A03p58520.1_BraTUA	0	5.75633	0	0
A09p28400.1_BraTUA	5.358	1.69333	2.90667	4.368
A07p25780.1_BraTUA	1.71867	22.6833	2.01	1.346
A07p24150.1_BraTUA	23.8737	15.0087	33.611	29.9383
A03p55970.1_BraTUA	13.9517	2.548	15.2537	17.4523
A02p14090.1_BraTUA	2.65267	5.23967	2.79167	2.274
A09p19960.1_BraTUA	6.869	40.0347	3.22733	3.19067
A09p55730.1_BraTUA	33.8727	0	52.2603	54.4723
A08p24110.1_BraTUA	0.061	1.36367	0.0293333	0.036
A09p68880.1_BraTUA	1.30233	8.00167	1.27733	1.08733
A05p26250.1_BraTUA	1.73933	122.028	0.267333	1.85267
A03p28610.1_BraTUA	76.1893	9.30633	135.699	163.974
A09p39820.1_BraTUA	8.99767	102.012	8.94033	6.51467
A01p29290.1_BraTUA	82.4633	0	110.05	116.205
A02p23850.1_BraTUA	0	0	0	0
A09p54620.1_BraTUA	0	167.64	0	0
A07p39230.1_BraTUA	110.627	32.753	117.235	117.715
A09p03550.1_BraTUA	130.368	0	157.09	35.061
A03p24060.1_BraTUA	0	63.2433	0	0
A09p14330.1_BraTUA	48.998	0	40.4783	61.1437
A02p34900.1_BraTUA	0	0	0	0
A04p15230.1_BraTUA	0	74.1703	0	0
A03p33780.1_BraTUA	66.4607	4.91267	60.4963	62.6123
A09p54640.1_BraTUA	6.548	24.3587	7.28833	9.93967
A08p06090.1_BraTUA	23.6343	0	26.0147	19.715
A05p38110.1_BraTUA	0	0	0.0286667	0
A03p64270.1_BraTUA	0	14.1307	0	0
A01p41780.1_BraTUA	9.978	0.22	16.9717	14.8773
A03p53690.1_BraTUA	0.128	0	0.164	0.0946667
A09p46160.1_BraTUA	0	7.44167	0	0
A06p21900.1_BraTUA	2.36333	0.167667	3.83433	14.608
A10p13120.1_BraTUA	0.247	59.5463	0.250333	0.350667
A01p44480.1_BraTUA	110.936	0.316333	53.323	46.526
A02p42400.1_BraTUA	0.504	1.51733	0.490667	0.63
A05p17870.1_BraTUA	1.06533	15.19	0.441667	0.886667
A07p39160.1_BraTUA	20.9497	0	18.1907	18.1287
A10p22290.1_BraTUA	0	2.94767	0	0
A08p36760.1_BraTUA	3.414	0	3.75033	1.83033
A01p33020.1_BraTUA	0	31.9287	0	0
A06p24670.1_BraTUA	42.7667	0	28.882	28.2747
A03p05500.1_BraTUA	0.019	0	0.173667	0.501333
A02p34140.1_BraTUA	0	16.059	0	0
A07p16080.1_BraTUA	19.7733	1.05033	19.857	17.0277
A02p41990.1_BraTUA	0.732667	0	0.479333	0.528333
A01p30300.1_BraTUA	0	0.0893333	0	0
A02p31960.1_BraTUA	0.307333	176.348	0.114	0.0963333
A01p38100.1_BraTUA	6.871	0	5.492	105.682
A04p19960.1_BraTUA	0	0	0	0
A03p15190.1_BraTUA	0	74.9637	0	0
A01p00260.1_BraTUA	45.591	150.197	70.9777	101.48
A07p36490.1_BraTUA	383.263	53.4013	215.129	175.864
A03p41570.1_BraTUA	49.5483	2.99933	46.71	48.9273
A07p02200.1_BraTUA	3.38967	22.9857	3.612	3.173
A08p31500.1_BraTUA	38.983	0	45.4067	32.6623
A03p11180.1_BraTUA	0	33.3677	0	0.029
A04p23110.1_BraTUA	26.1407	0.505333	31.678	43.8613
A08p01370.1_BraTUA	0.800667	99.7567	0.955	0.313333
A04p20410.1_BraTUA	117.968	1.979	44.4307	65.0723
A05p08600.1_BraTUA	1.97833	33.4553	3.68633	2.47767
A09p69230.1_BraTUA	18.136	0	35.4503	45.7033
A04p10370.1_BraTUA	0	1.13733	0	0
A05p25670.1_BraTUA	1.443	0	1.57567	1.63767
A05p20520.1_BraTUA	0	14.9957	0	0
A08p11390.1_BraTUA	15.357	5.492	13.2167	12.91
A03p40710.1_BraTUA	7.005	63.864	6.3	4.54567
A07p25490.1_BraTUA	59.553	40.141	81.6983	83.18
A08p12860.1_BraTUA	34.0737	0.362	49.3137	50.2413
A09p10850.1_BraTUA	0.388333	0	0.294	0.315667
A09p39220.1_BraTUA	0	1.63633	0	0
A06p41770.1_BraTUA	10.7093	18.1723	2.56333	0.763333
A01p22940.1_BraTUA	20.7823	33.5333	27.4117	21.5033
A02p27330.1_BraTUA	48.831	5.15967	61.559	45.8323
A01p18340.1_BraTUA	5.86033	0	4.754	5.872
A02p43250.1_BraTUA	0	3.872	0	0
A02p24300.1_BraTUA	4.30333	0	3.42233	2.74
A03p29190.1_BraTUA	0	1.55733	0.0436667	0
A02p12730.1_BraTUA	0.0446667	0.982	0.0826667	0.84
A02p19350.1_BraTUA	3.90633	0.0533333	0.0766667	0.647333
A08p07650.1_BraTUA	0.103	0.0136667	0.0463333	0
A05p37010.1_BraTUA	0	51.6223	0.0253333	0
A08p33780.1_BraTUA	60.6953	0	30.4847	30.401
A09p31680.1_BraTUA	0	6.82167	0	0
A06p35580.1_BraTUA	14.5337	28.0987	3.29067	9.281
A10p06210.1_BraTUA	29.324	1.061	23.663	23.884
A03p31960.1_BraTUA	1.13433	0.163	1.179	0.919333
A07p09770.1_BraTUA	0.139	18.8357	0.0493333	0.0486667
A07p24040.1_BraTUA	14.4967	0.442333	20.4953	20.15
A01p13290.1_BraTUA	0.388333	0.492	0.347333	0.224667
A07p10780.1_BraTUA	1.55767	0.0273333	0.371	0.625333
A03p41390.1_BraTUA	0.0253333	7.886	0.140667	0.0296667
A10p01850.1_BraTUA	9.25467	0.0876667	10.7917	8.12967
A03p02240.1_BraTUA	0.0966667	0	0.0686667	0.015
A09p20820.1_BraTUA	0.044	0.083	0.0106667	0.0516667
A08p29450.1_BraTUA	0.0686667	0	0.019	0.058
A06p05990.1_BraTUA	0	0	0.0496667	0
A07p12060.1_BraTUA	0	0.098	0	0
A08p18080.1_BraTUA	0.0243333	1.35767	0.0416667	0.256333
A06p40470.1_BraTUA	0.713	0	1.12167	1.51533
A09p34570.1_BraTUA	0	6.36133	0	0
A09p00510.1_BraTUA	6.78133	24.3167	9.86867	8.917
A05p05840.1_BraTUA	22.4677	0	25.4297	25.258
A09p66580.1_BraTUA	0	9.44	0	0.105333
A10p03510.1_BraTUA	11.7767	11.0557	10.727	9.31967
A05p36830.1_BraTUA	9.94867	9.136	12.8493	11.2403
A06p15740.1_BraTUA	2.382	0.00666667	3.75767	6.65267
A04p31980.1_BraTUA	0.0136667	2.54333	0.032	0.0153333
A07p20460.1_BraTUA	3.379	19.3767	2.51233	3.21567
A06p24800.1_BraTUA	16.6593	0	13.6047	17.6003
A02p20830.1_BraTUA	0.184	6.166	0.0363333	0
A07p35590.1_BraTUA	2.524	0.335667	3.17567	4.53267
A07p31710.1_BraTUA	0.133	1.41667	0.136	0.170667
A03p23800.1_BraTUA	1.81433	0.0526667	0.331333	1.14633
A10p15100.1_BraTUA	0.0986667	55.6503	0.0733333	0.073
A02p23980.1_BraTUA	70.305	56.229	61.1153	54.366
A06p37250.1_BraTUA	7.97167	8.071	3.82767	20.8343
A08p17530.1_BraTUA	9.66467	78.7093	7.43567	6.66667
A04p24160.1_BraTUA	75.368	7.89433	74.9073	96.6467
A05p39750.1_BraTUA	8.24067	0	9.02533	7.66367
A04p29270.1_BraTUA	0	0	0	0
A04p25340.1_BraTUA	0	3.337	0.0736667	0
A04p03750.1_BraTUA	2.89667	0.0276667	2.25267	2.85967
A07p39490.1_BraTUA	0.0566667	66.7383	0	0
A04p13000.1_BraTUA	106.424	0	41.9607	45.0013
A10p20600.1_BraTUA	0	0.332667	0	0
A04p08740.1_BraTUA	0.124	11.0713	0.059	0.280667
A04p20870.1_BraTUA	14.2	71.6677	10.6023	9.433
A01p08720.1_BraTUA	54.618	0	56.05	69.105
A01p38360.1_BraTUA	0	0	0	0
A06p26860.1_BraTUA	0	0	0	0
A10p09490.1_BraTUA	0	3.225	0	0
A09p09150.1_BraTUA	3.88367	0	4.87233	5.021
A01p38340.1_BraTUA	0	0.956333	0	0
A04p09770.1_BraTUA	1.76567	0.064	1.47767	0.686667
A03p29070.1_BraTUA	0.177	0	0.157667	0.202
A02p22450.1_BraTUA	0	0.0613333	0	0
A10p29160.1_BraTUA	0.048	4.256	0.0356667	0.119667
A02p45590.1_BraTUA	2.69267	0	2.95467	2.77667
A08p26100.1_BraTUA	0	21.7913	0	0
A01p33490.1_BraTUA	25.9657	0	27.5187	24.8097
A02p27920.1_BraTUA	0	0	0	0
A02p10550.1_BraTUA	0	30.15	0	0
A10p34970.1_BraTUA	46.3257	1.05033	27.0633	27.8867
A07p16290.1_BraTUA	0.709667	0.111667	7.123	6.07233
A03p21930.1_BraTUA	0.0183333	0.958	0.0943333	0.167
A06p14320.1_BraTUA	0.945333	0	0.439667	0.719
A06p39160.1_BraTUA	0.00833333	37.225	0	0
A06p12270.1_BraTUA	28.1913	0	28.4523	35.3993
A09p21980.1_BraTUA	0	0.216	0	0
A07p44090.1_BraTUA	0.218	0.204	0.170333	0.169333
A06p44570.1_BraTUA	0.144333	0.316667	0.509	0.311667
A02p18460.1_BraTUA	0.163667	0.146667	0.163333	0.300333
A09p14570.1_BraTUA	0.567	12.372	0.308667	0.224
A06p16890.1_BraTUA	11.586	0	13.9723	14.4587
A08p20840.1_BraTUA	0	17.004	0	0
A08p15340.1_BraTUA	18.827	0.723	15.699	14.9107
A02p30590.1_BraTUA	0.616667	1.01233	0.65	0.755333
A03p35360.1_BraTUA	0.571667	0	0.250667	0.658333
A01p06600.1_BraTUA	0	0.184667	0	0
A02p23930.1_BraTUA	0.173	0.00866667	0.153667	0.106
A08p16820.1_BraTUA	0	28.593	0	0
A10p18890.1_BraTUA	29.7227	1.311	42.255	36.415
A08p28920.1_BraTUA	4.754	7.187	1.24333	1.044
A01p43690.1_BraTUA	4.763	0	5.89733	8.045
A09p70090.1_BraTUA	0	0	0.031	0.064
A03p11280.1_BraTUA	0	0	0.01	0
A09p15740.1_BraTUA	0	0.339667	0.787	0.175
A08p17400.1_BraTUA	0.227333	9.26733	0.0763333	0.094
A10p01010.1_BraTUA	12.1583	0	10.2123	6.28067
A03p16400.1_BraTUA	0	0	0	0
A07p11590.1_BraTUA	0	4.68333	0	0
A06p16140.1_BraTUA	5.36133	0	3.028	2.79567
A05p20190.1_BraTUA	0.00466667	0.951333	0	0
A06p02380.1_BraTUA	0.329333	0.136333	0.370667	0.944333
A09p33420.1_BraTUA	0.0613333	2.412	0.023	0.0753333
A04p02600.1_BraTUA	0.892667	35.0513	2.11967	2.18267
A01p20330.1_BraTUA	26.918	0.157667	29.7923	32.2837
A02p46750.1_BraTUA	0.09	0	0	0.0486667
A03p51230.1_BraTUA	0	0	0	0
A07p41280.1_BraTUA	0	0.214667	0	0.0266667
A09p19140.1_BraTUA	0.154667	30.7857	0.202	0.29
A03p26670.1_BraTUA	61.9243	7.471	38.2107	37.1307
A03p26270.1_BraTUA	8.28267	0.519667	8.92133	6.97433
A09p26480.1_BraTUA	0.133333	0.011	0.0853333	0.409667
A08p22500.1_BraTUA	0.066	0	0.0233333	0
A10p19630.1_BraTUA	0	19.3433	0	0
A09p39080.1_BraTUA	16.823	0	22.001	23.541
A03p17800.1_BraTUA	0	0	0	0.0776667
A09p36280.1_BraTUA	0	0.0373333	0	0
A02p35680.1_BraTUA	0.0716667	0.181667	0.246333	0
A06p24990.1_BraTUA	0.125667	0	0.086	0.0576667
A07p10480.1_BraTUA	0.014	4.697	0.0133333	0
A08p20750.1_BraTUA	5.19167	0.162	5.168	5.361
A05p23810.1_BraTUA	0.325667	0.915667	0.202333	0.236667
A02p42020.1_BraTUA	0.852667	17.0993	0.945333	1.14667
A10p15090.1_BraTUA	12.842	103.582	16.865	11.7133
A07p43850.1_BraTUA	84.268	1.39833	99.0403	94.652
A07p14000.1_BraTUA	1.184	10.355	1.94667	3.119
A06p08190.1_BraTUA	12.617	0	14.5663	11.9503
A03p48120.1_BraTUA	0	3.926	0	0
A09p13970.1_BraTUA	3.01067	13.322	4.75967	5.38167
A09p66140.1_BraTUA	12.4477	4.11867	13.2177	11.253
A05p35610.1_BraTUA	5.18133	0	2.545	1.446
A03p62750.1_BraTUA	0	1.222	0	0
A08p34900.1_BraTUA	1.28867	2.49067	1.395	1.05
A04p23260.1_BraTUA	2.09633	0	2.51767	2.267
A10p06450.1_BraTUA	0	210.584	0	0
A05p11530.1_BraTUA	176.419	0	143.638	172.583
A09p20280.1_BraTUA	0	6.03067	0	0
A03p14940.1_BraTUA	6.61067	68.5667	4.49567	9.15733
A05p15330.1_BraTUA	45.558	14.5153	38.438	54.9417
A04p28200.1_BraTUA	11.354	0	4.28467	5.70367
A02p32460.1_BraTUA	0	0	0	0
A06p28000.1_BraTUA	0	0	0	0
A02p33230.1_BraTUA	0	3.96433	0	0
A03p42360.1_BraTUA	3.73133	0	3.58167	4.506
A02p07390.1_BraTUA	0	70.946	0	0
A01p43100.1_BraTUA	82.5487	16.8897	72.9087	67.005
A09p04310.1_BraTUA	19.045	1.54367	16.9977	12.8603
A05p11870.1_BraTUA	0.813	199.929	1.45033	0.506333
A05p23830.1_BraTUA	151.903	4.244	138.732	143.423
A03p16890.1_BraTUA	5.77833	4.20567	3.15433	3.87733
A01p02990.1_BraTUA	5.42767	10.2173	2.78833	2.00233
A04p23990.1_BraTUA	12.723	10.4777	9.42967	11.5517
A05p38560.1_BraTUA	8.44267	38.3563	9.87033	9.533
A10p22920.1_BraTUA	54.414	37.1163	37.0053	32.17
A06p41320.1_BraTUA	47.1607	0	21.3987	30.1467
A09p66380.1_BraTUA	0.00833333	8.69167	0.00833333	0.00933333
A09p50370.1_BraTUA	1.53867	0	2.481	6.99367
A04p26650.1_BraTUA	0	10.6137	0	0
A01p12150.1_BraTUA	5.71	0.142667	4.85867	13.348
A03p39470.1_BraTUA	0.483	1.307	0.219	0.389333
A09p71630.1_BraTUA	0.802667	0	0.74	1.481
A06p26630.1_BraTUA	0	101.694	0	0
A07p43400.1_BraTUA	77.9813	0.024	124.665	165.7
A07p27550.1_BraTUA	0	0.00966667	0.066	0
A01p09920.1_BraTUA	0.009	47.8533	0.026	0.02
A05p12080.1_BraTUA	33.1763	20.4603	61.6433	55.868
A01p35310.1_BraTUA	19.363	6.30933	18.7607	18.6687
A03p00720.1_BraTUA	8.49533	22.5847	6.46267	5.172
A01p22270.1_BraTUA	24.206	0	20.4203	18.7257
A03p28920.1_BraTUA	0	3.492	0	0
A02p18110.1_BraTUA	3.975	7.001	5.40033	3.848
A03p34140.1_BraTUA	7.51133	0	6.54267	4.95967
A03p09370.1_BraTUA	0	0.238333	0	0
A05p18390.1_BraTUA	0.0253333	0.073	0.0703333	0
A09p03680.1_BraTUA	0.255333	0	0.071	0.135667
A09p62220.1_BraTUA	0	0	0	0
A09p01560.1_BraTUA	0	37.826	0	0
A04p04730.1_BraTUA	96.5437	156.229	52.7207	43.9717
A07p42960.1_BraTUA	163.051	0	179.773	177.413
A06p37360.1_BraTUA	0	0	0	0.074
A04p05800.1_BraTUA	0	0.456667	0.0793333	0.0303333
A06p11540.1_BraTUA	0.648	0.419	0.723	0.506667
A09p67120.1_BraTUA	0.093	0	0.146667	0.309667
A04p09130.1_BraTUA	0	0.323	0	0
A06p26050.1_BraTUA	0.322333	0.361333	0.349333	0.359333
A05p13160.1_BraTUA	0.998333	0.727333	0.375667	0.0543333
A04p16410.1_BraTUA	0.567333	0.096	0.710667	1.01633
A03p34220.1_BraTUA	0.063	5.45933	0.258667	0.385333
A01p24390.1_BraTUA	6.975	43.9583	4.86733	5.326
A09p43770.1_BraTUA	41.76	124.004	27.6523	32.02
A06p04960.1_BraTUA	95.01	0	114.407	126.685
A08p26870.1_BraTUA	0	33.4643	0	0
A02p15830.1_BraTUA	42.11	0	51.3253	37.4883
A08p23210.1_BraTUA	0	0	0	0
A02p14900.1_BraTUA	0	0	0	0
A10p16010.1_BraTUA	0.04	11.4077	0.119333	0.312
A02p41740.1_BraTUA	8.463	4.95233	8.72767	12.9363
A09p47720.1_BraTUA	4.98267	1.942	4.624	4.745
A08p16700.1_BraTUA	10.3577	0	2.212	0.757333
A10p12530.1_BraTUA	0	3.70067	0	0
A06p27800.1_BraTUA	6.57467	28.5013	2.90267	2.172
A10p06330.1_BraTUA	28.1077	39.814	33.3303	32.373
A05p38130.1_BraTUA	57.0057	6.307	39.6743	43.8007
A05p00100.1_BraTUA	4.295	0.463	9.20833	7.371
A05p39680.1_BraTUA	0.597333	19.6337	0.278333	0.259
A06p14620.1_BraTUA	16.0957	0.535333	13.751	19.1313
A09p48980.1_BraTUA	0.986	0.113667	1.928	0.547667
A07p19620.1_BraTUA	0.358667	13.8717	0.186333	0.105
A04p19620.1_BraTUA	14.87	2.177	15.5543	14.4333
A06p28950.1_BraTUA	3.35633	0	3.23933	2.30533
A06p16080.1_BraTUA	0	0.529	0	0
A01p08450.1_BraTUA	0.505333	0	0.54	0.718
A05p09410.1_BraTUA	0	0	0.016	0
A03p29270.1_BraTUA	0	0	0	0
A02p08060.1_BraTUA	0	10.859	0	0
A05p21860.1_BraTUA	10.8003	10.9527	11.5973	10.8647
A10p25690.1_BraTUA	9.78	0.026	11.4933	16.508
A08p18350.1_BraTUA	0	0.0713333	0	0
A03p50820.1_BraTUA	0	13.085	0.039	0
A03p02920.1_BraTUA	17.5507	1.36333	12.977	10.4737
A03p38500.1_BraTUA	1.38	1.179	0.620333	1.459
A05p38420.1_BraTUA	0.405667	0	0.518667	0.723333
A01p26360.1_BraTUA	0	4.098	0	0
A10p05630.1_BraTUA	4.49533	3.739	4.56567	0.92
A09p13210.1_BraTUA	3.17467	0	3.072	3.622
A05p16430.1_BraTUA	0	0	0	0
A06p31770.1_BraTUA	0.0653333	0.455333	0	0
A09p16760.1_BraTUA	7.691	2.009	2.02433	0.193333
A05p09710.1_BraTUA	2.10267	0	2.62467	1.72633
A06p02630.1_BraTUA	0	15.825	0	0
A09p11390.1_BraTUA	18.534	0.393667	21.1003	24.1673
A09p11060.1_BraTUA	0.473	0	0.210667	0.541333
A06p34160.1_BraTUA	0	13.85	0	0
A05p27670.1_BraTUA	6.08167	1.67667	8.005	8.778
A01p45880.1_BraTUA	0.051	1.782	0.312	0.744667
A04p00190.1_BraTUA	0.216667	0.026	0.660333	0.658
A04p14850.1_BraTUA	0.046	6.36133	0.0113333	0
A05p20740.1_BraTUA	5.97433	2.19267	6.35667	5.433
A08p18370.1_BraTUA	2.59533	12.992	2.22967	1.82933
A07p26750.1_BraTUA	16.4993	1507.21	19.1117	15.678
A07p40980.1_BraTUA	883	16.2077	777.581	949.687
A10p13500.1_BraTUA	14.7547	33.2823	15.6263	17.1807
A02p36380.1_BraTUA	33.6397	6.741	42.395	47.285
A03p43860.1_BraTUA	11.0887	8.594	9.05933	6.41033
A10p32040.1_BraTUA	12.67	16.1393	4.81633	5.524
A03p04840.1_BraTUA	13.4587	23.172	10.635	13.427
A09p55490.1_BraTUA	16.518	0.206	20.2253	19.7347
A02p39330.1_BraTUA	0.078	17.3003	0.139	0.110333
A08p34070.1_BraTUA	31.715	14.1017	16.2083	28.3373
A07p16790.1_BraTUA	13.1383	0.788667	10.8227	12.3037
A10p11170.1_BraTUA	0.655667	10.251	0.593667	0.365333
A10p26990.1_BraTUA	8.03267	29.4107	9.28433	10.3283
A06p44470.1_BraTUA	17.797	1.37367	19.4803	27.745
A03p65440.1_BraTUA	1.133	1.039	1.99367	1.025
A09p52390.1_BraTUA	0.383	0.048	0.977667	2.16867
A03p08750.1_BraTUA	0.0893333	0.0143333	0.0216667	0.0416667
A01p45120.1_BraTUA	0.663333	22.9737	0.427667	0.044
A05p02270.1_BraTUA	43.392	0.929667	26.155	20.2367
A03p45620.1_BraTUA	1.83433	0.900333	1.356	1.32167
A03p08660.1_BraTUA	0.630333	10.778	3.355	0.881667
A09p63450.1_BraTUA	8.83233	7.65267	8.601	10.5867
A09p52100.1_BraTUA	5.504	14.6353	8.42933	9.613
A09p49020.1_BraTUA	24.0207	0	33.259	23.2953
A05p19290.1_BraTUA	0	0	0.011	0.012
A01p29790.1_BraTUA	0	0.02	0	0
A09p29040.1_BraTUA	0.019	0	0.0176667	0.0636667
A01p23780.1_BraTUA	0	0	0	0
A03p50250.1_BraTUA	0	33.7297	0	0
A09p16710.1_BraTUA	39.6997	0	31.3117	34.2357
A07p13270.1_BraTUA	0	2.39467	0	0
A05p30890.1_BraTUA	3.53567	54.1207	1.66767	1.62367
A06p03170.1_BraTUA	34.7777	0	52.9407	59.2857
A01p28030.1_BraTUA	0	0.0836667	0	0
A06p05840.1_BraTUA	0.0716667	0.526667	0.0646667	0.129333
A10p01590.1_BraTUA	0.812	0.399333	0.790667	0.922667
A01p37190.1_BraTUA	0.0913333	0	0.437667	0.269667
A04p10530.1_BraTUA	0	21.6697	0	0
A05p01850.1_BraTUA	21.3473	0	24.033	25.9447
A08p07450.1_BraTUA	0	158.081	0	0
A04p26730.1_BraTUA	118.778	0	141.181	206.122
A10p23030.1_BraTUA	0	0	0	0
A09p29110.1_BraTUA	0.0296667	0.005	0	0.00866667
A03p63820.1_BraTUA	0.005	13.4953	0.00933333	0.011
A06p36290.1_BraTUA	7.74767	5.495	16.338	21.213
A06p31720.1_BraTUA	13.2577	8.16633	7.35567	6.24067
A03p01810.1_BraTUA	15.0853	3.84967	15.28	8.57233
A09p18660.1_BraTUA	1.15333	12.8197	2.80833	2.25167
A10p13380.1_BraTUA	14.1787	5.88	12.8423	12.5073
A09p69520.1_BraTUA	7.72367	0.972	6.04833	5.40133
A01p38920.1_BraTUA	0.382667	1.80267	2.43033	1.02233
A09p09000.1_BraTUA	3.161	0	1.403	1.397
A10p06310.1_BraTUA	0	4.24	0	0.016
A08p08740.1_BraTUA	3.97633	0	3.877	3.39367
A09p64980.1_BraTUA	0.013	22.3547	0.127	0.124667
A10p24280.1_BraTUA	25.5923	0	25.626	24.5303
A08p33470.1_BraTUA	0	0	0	0
A09p25150.1_BraTUA	0	20.118	0	0
A09p38950.1_BraTUA	4.92567	0	6.921	18.6687
A05p00910.1_BraTUA	0	5.42767	0	0
A03p20080.1_BraTUA	0.457667	0	3.882	11.787
A08p07640.1_BraTUA	0	0	0	0
A01p14610.1_BraTUA	0	4.298	0	0
A03p10490.1_BraTUA	4.20567	0.0103333	4.95533	3.241
A01p18240.1_BraTUA	0	18.2987	0	0
A05p28220.1_BraTUA	19.235	5.728	16.6037	12.9393
A06p43270.1_BraTUA	15.162	0.259	8.665	4.82567
A05p36240.1_BraTUA	0.216	0	0.149333	0.241333
A02p35810.1_BraTUA	0	0.0703333	0	0
A09p24370.1_BraTUA	0.212667	6.73	0.220333	0.092
A09p14170.1_BraTUA	8.13733	0.773	3.30267	3.95967
A07p39650.1_BraTUA	0.478333	2.03533	1.11567	0.654667
A06p30200.1_BraTUA	2.47567	3.64	2.15833	1.94633
A03p40510.1_BraTUA	5.226	0.351333	8.41667	3.96867
A01p27280.1_BraTUA	0.438333	0.435667	0.173333	0.173
A04p32550.1_BraTUA	0.386333	49.5263	0.0243333	0.498667
A08p11510.1_BraTUA	60.056	0	54.559	46.001
A03p20630.1_BraTUA	0	35.3843	0	0.0403333
A09p57810.1_BraTUA	15.717	23.0767	11.9633	12.8513
A09p53080.1_BraTUA	21.9257	1.58	21.2093	27.339
A02p06320.1_BraTUA	1.70933	45.8823	1.33867	1.334
A03p10540.1_BraTUA	19.2343	2.36033	21.1927	43.3443
A03p55510.1_BraTUA	3.19533	0	1.35233	0.663333
A10p28630.1_BraTUA	0.0803333	16.85	0.0646667	0.0426667
A05p27420.1_BraTUA	15.0697	0.288333	14.337	12.9657
A04p17620.1_BraTUA	0.133	0.21	0	0
A01p48030.1_BraTUA	0.737	1.945	0.427667	1.24667
A07p33650.1_BraTUA	1.98833	0	1.63433	1.95433
A07p04080.1_BraTUA	0	1.872	0	0
A03p12540.1_BraTUA	2.29167	0	1.16267	1.21133
A09p45610.1_BraTUA	0	3.20733	0	0
A01p37810.1_BraTUA	4.14133	2.26567	2.488	2.085
A01p38670.1_BraTUA	4.76333	6.51933	1.548	1.596
A03p28210.1_BraTUA	5.96733	63.172	5.37733	6.48667
A08p10410.1_BraTUA	96.9633	2.63433	134.596	90.9377
A09p03580.1_BraTUA	6.05833	0	8.73433	2.526
A06p33850.1_BraTUA	0	0	0	0
A03p31320.1_BraTUA	0	0.249333	0.0686667	0
A03p20520.1_BraTUA	1.43467	12.6457	0.788667	0
A02p46450.1_BraTUA	11.151	6.698	7.8	8.72
A04p05480.1_BraTUA	6.92933	0	9.37667	6.357
A01p00620.1_BraTUA	0	2.489	0	0
A04p23900.1_BraTUA	5.705	1.89133	0.907333	1.22233
A05p28700.1_BraTUA	2.38067	16.425	2.686	1.03067
A09p62360.1_BraTUA	13.4863	6.71367	20.335	18.254
A09p56590.1_BraTUA	6.51433	40.1283	9.30333	7.94933
A08p25290.1_BraTUA	38.8497	77.6657	27.917	38.6233
A01p32570.1_BraTUA	1.357	0	2.15133	47.9677
A08p23510.1_BraTUA	0	0	0	0.0846667
A09p20590.1_BraTUA	0	0.101667	0.153	0.0433333
A06p14530.1_BraTUA	0.103333	0.579333	0.166333	0.153333
A01p07730.1_BraTUA	0.671	15.0493	0.294667	0.557333
A09p44770.1_BraTUA	16.2473	1.30233	20.4327	16.8243
A03p59740.1_BraTUA	0.956667	0	0.620333	1.23867
A05p22310.1_BraTUA	0	0	0	0
A10p08380.1_BraTUA	0	13.0273	0	0
A01p15310.1_BraTUA	7.20033	0	16.838	20.3453
A02p23250.1_BraTUA	0	0.268667	0	0
A02p01210.1_BraTUA	0.167667	0.977	0.098	0.111667
A07p07890.1_BraTUA	0.667667	0	1.66867	1.678
A10p12910.1_BraTUA	0	16.4013	0	0
A09p36780.1_BraTUA	15.8363	44.091	18.1967	18.1823
A01p43890.1_BraTUA	12.5547	0	17.6077	48.4983
A03p26740.1_BraTUA	0	0	0	0
A07p32770.1_BraTUA	0	30.5513	0	0
A05p04750.1_BraTUA	31.6993	8.42767	38.5433	30.392
A06p13760.1_BraTUA	11.979	0.0576667	10.6337	7.748
A04p02430.1_BraTUA	0	0	0.053	0
A05p38240.1_BraTUA	0	55.117	0	0
A07p19720.1_BraTUA	47.2777	0.127667	55.1997	59.7053
A07p11690.1_BraTUA	0	26.6737	0.0263333	0.0773333
A06p25010.1_BraTUA	25.5617	13.0927	22.611	24.1183
A02p41130.1_BraTUA	10.5833	0	13.413	13.3677
A01p31930.1_BraTUA	0	24.501	0	0
A09p69080.1_BraTUA	24.1227	0	32.9263	26.6103
A01p17320.1_BraTUA	0	16.2547	0	0
A03p52740.1_BraTUA	11.5407	0.0456667	11.4777	16.1373
A06p41660.1_BraTUA	0	2.36933	0.087	0.0266667
A04p09220.1_BraTUA	7.07667	72.866	7.42167	4.40233
A04p32290.1_BraTUA	82.7217	0	75.6813	72.028
A01p20800.1_BraTUA	0	0	0	0
A04p00240.1_BraTUA	0	2.06533	0	0
A03p15910.1_BraTUA	0.499333	0.024	1.25333	1.158
A07p27130.1_BraTUA	0.112667	0	0.0213333	0
A10p09180.1_BraTUA	0	11.441	0	0
A03p15790.1_BraTUA	9.79867	6.272	11.0883	13.0737
A09p01860.1_BraTUA	4.12633	19.27	6.065	5.90433
A05p41170.1_BraTUA	22.3593	222.657	22.361	20.1747
A01p23090.1_BraTUA	296.251	17.6053	237.743	140.459
A01p38210.1_BraTUA	4.03767	0.0236667	2.77667	8.173
A08p21740.1_BraTUA	0.0463333	0	0.128333	0.0553333
A05p06820.1_BraTUA	0	10.7553	0	0
A08p09650.1_BraTUA	11.2977	0.326	10.3487	11.3823
A03p50880.1_BraTUA	0.420333	36.417	0.172667	0.123667
A09p23470.1_BraTUA	61.84	3.985	34.121	28.265
A09p50670.1_BraTUA	4.27267	0	2.862	2.51167
A09p05380.1_BraTUA	0	0.063	0.015	0
A03p22170.1_BraTUA	0.0183333	9.645	0.0183333	0
A01p04690.1_BraTUA	13.014	83.2297	13.1933	12.3943
A03p35520.1_BraTUA	99.797	0	79.321	80.0013
A08p22100.1_BraTUA	0	7.819	0	0
A02p37450.1_BraTUA	9.22533	0	8.572	7.393
A08p20930.1_BraTUA	0	4.42467	0	0
A06p07620.1_BraTUA	5.754	2.639	7.763	9.062
A10p35270.1_BraTUA	7.27267	31.8623	5.577	0.695333
A04p18270.1_BraTUA	24.302	0.0186667	34.7837	36.6207
A03p37800.1_BraTUA	0.037	71.2473	0	0
A04p22460.1_BraTUA	64.736	78.1487	81.3453	81.8317
A03p27500.1_BraTUA	90.239	18.497	93.5107	86.6043
A01p39270.1_BraTUA	13.8707	13.9357	5.13833	11.5977
A10p21240.1_BraTUA	15.8473	12.678	19.2983	15.853
A01p37830.1_BraTUA	13.1647	131.649	14.0503	12.4763
A09p22080.1_BraTUA	75.897	3.06233	52.951	66.5153
A06p18530.1_BraTUA	2.46067	1.44867	4.21733	4.615
A09p12720.1_BraTUA	0.394667	0	0.374	0.852
A02p12930.1_BraTUA	0	6.064	0	0
A03p48480.1_BraTUA	5.69167	0	6.763	6.10933
A07p07620.1_BraTUA	0	34.446	0	0
A03p01770.1_BraTUA	30.988	0	35.54	37.4017
A05p09190.1_BraTUA	0	2.00933	0	0
A01p24210.1_BraTUA	1.83967	3.61167	1.75533	1.82933
A04p12250.1_BraTUA	5.32167	31.2203	5.328	4.10433
A05p11190.1_BraTUA	53.9673	0	50.1923	42.2507
A10p31580.1_BraTUA	0	0.0833333	0	0
A02p45790.1_BraTUA	0.423	61.583	0.314	0.340333
A10p32320.1_BraTUA	55.3637	18.5677	62.368	64.5287
A04p27650.1_BraTUA	10.623	12.2287	9.97867	16.7843
A02p07840.1_BraTUA	9.14233	0.638333	9.36733	10.8127
A07p09420.1_BraTUA	1.073	0	0.711	0.612
A05p39460.1_BraTUA	0	35.5773	0	0
A01p03220.1_BraTUA	43.0893	0	44.7123	34.4397
A07p15300.1_BraTUA	0	29.319	0	0
A03p26610.1_BraTUA	28.5193	0	32.4487	34.486
A09p44320.1_BraTUA	0	0	0	0
A02p35550.1_BraTUA	0	9.262	0	0
A03p20290.1_BraTUA	8.33833	3.81833	6.054	6.819
A09p07290.1_BraTUA	4.61667	19.053	2.953	2.559
A09p19310.1_BraTUA	20.0427	28.721	22.777	21.9657
A10p33990.1_BraTUA	36.697	8.06067	37.9763	31.4387
A02p27960.1_BraTUA	5.619	58.8903	6.245	4.775
A03p24000.1_BraTUA	64.9823	30.1423	174.787	162.591
A09p01090.1_BraTUA	50.7437	1.83567	19.8343	12.6227
A10p25950.1_BraTUA	2.11267	470.855	2.425	1.89367
A03p40360.1_BraTUA	698.904	0	696.466	422.408
A02p25360.1_BraTUA	0	1.45767	0	0
A02p43900.1_BraTUA	2.26267	0.358	2.144	1.794
A07p27140.1_BraTUA	0.0453333	0.309667	0.130667	0.151
A07p21100.1_BraTUA	0.704667	0.0576667	0.498333	0.652667
A07p21090.1_BraTUA	1.68667	1.746	0.758	0.261
A06p25030.1_BraTUA	1.81867	0.947667	1.39867	1.24867
A08p11990.1_BraTUA	0.173333	0.410333	0.288	1.31433
A03p47320.1_BraTUA	0.212333	18.8397	0.207667	0.352333
A08p25170.1_BraTUA	12.588	5.305	21.1	19.9107
A04p31510.1_BraTUA	6.59467	0	4.14133	5.45133
A03p54660.1_BraTUA	0	0	0	0
A09p54210.1_BraTUA	0	0.0313333	0	0
A06p45060.1_BraTUA	0.207333	711.424	0.210333	0.433667
A09p02520.1_BraTUA	1290.86	16.2053	1402.51	993.69
A06p19960.1_BraTUA	15.423	0	21.0687	20.983
A02p44570.1_BraTUA	0.0296667	37.455	0.0186667	0
A05p39410.1_BraTUA	25.549	0.951	30.898	35.6927
A02p13620.1_BraTUA	0	0.153	0.0343333	0.437
A10p05260.1_BraTUA	0.0296667	110.635	0.055	0.423667
A09p08780.1_BraTUA	113.799	1.877	118.42	116.759
A08p23310.1_BraTUA	2.17367	3.74133	1.661	2.04867
A09p58780.1_BraTUA	5.427	5.48767	6.18233	3.22467
A09p56750.1_BraTUA	5.86333	1.25967	5.07167	5.053
A03p06080.1_BraTUA	0	1.04433	0.706	1.00567
A02p32530.1_BraTUA	1.77867	0.217	1.005	1.15867
A01p07350.1_BraTUA	1.08533	3.02567	0.801	0.34
A01p35660.1_BraTUA	3.75733	0	4.86333	3.28567
A06p20510.1_BraTUA	0	0	0	0
A03p50570.1_BraTUA	0	34.8777	0	0
A02p04560.1_BraTUA	15.9077	11.9193	25.836	38.8677
A03p35130.1_BraTUA	11.9277	0.0886667	13.3467	13.0183
A06p07910.1_BraTUA	0.130333	9.266	0.166333	0.121
A10p34600.1_BraTUA	11.8567	0	8.65933	8.42067
A04p32220.1_BraTUA	0	25.0667	0	0.0503333
A01p39980.1_BraTUA	12.1013	0	52.3533	72.0443
A04p09350.1_BraTUA	0	0	0	0
A06p27240.1_BraTUA	0.0986667	49.302	0	0
A10p18030.1_BraTUA	76.8307	54.1893	104.306	101.929
A04p03720.1_BraTUA	135.457	44.9957	155.981	104.834
A07p25860.1_BraTUA	37.516	24.641	50.6527	54.6727
A03p38960.1_BraTUA	36.1403	6.34567	31.4577	33.6037
A06p04060.1_BraTUA	5.06067	19.8203	4.786	5.06667
A03p33430.1_BraTUA	15.8763	10.22	15.1133	18.7673
A03p21400.1_BraTUA	9.77433	16.0957	8.69733	9.12067
A04p16120.1_BraTUA	14.773	4.47933	14.4527	16.7773
A03p38750.1_BraTUA	2.70167	0.022	3.48833	3.353
A04p21390.1_BraTUA	0.011	0.1	0	0.069
A06p26310.1_BraTUA	0.162667	2.93367	0.145	0.135667
A02p46180.1_BraTUA	3.08567	0	2.40133	2.05867
A08p05190.1_BraTUA	0	0.0413333	0	0
A09p22770.1_BraTUA	0.595667	37.0263	0.583333	0.115333
A07p37300.1_BraTUA	20.069	21.7567	22.7653	38.9223
A02p45440.1_BraTUA	18.74	0.0476667	17.1193	16.281
A04p05170.1_BraTUA	0	0.138333	0	0
A08p31750.1_BraTUA	0.333	0.714667	0.064	0.130667
A03p08780.1_BraTUA	0.626333	9.56067	0.369667	0.298667
A03p16040.1_BraTUA	12.9287	1.56667	5.79833	8.466
A05p37630.1_BraTUA	1.35133	0	1.36333	1.24133
A01p43260.1_BraTUA	0	33.758	0	0
A06p28600.1_BraTUA	50.7137	1.14467	77.824	57.308
A02p00950.1_BraTUA	0.809	20.635	1.00867	1.53833
A09p43130.1_BraTUA	11.9027	23.1013	18.8857	29.8437
A03p15860.1_BraTUA	15.935	5.841	25.3207	25.9033
A07p43200.1_BraTUA	10.8623	0	9.71433	14.0403
A10p23770.1_BraTUA	0	0.655667	0	0
A02p02120.1_BraTUA	0.551667	5.75267	0.150667	0.441
A02p32610.1_BraTUA	5.22733	148.554	5.58	5.39967
A09p03930.1_BraTUA	44.931	0.129667	58.496	130.388
A04p13420.1_BraTUA	0.123	112.368	0.029	0
A05p03990.1_BraTUA	77.9553	1.74067	106.41	136.813
A01p21580.1_BraTUA	1.59533	0	1.45433	1.27433
A08p02040.1_BraTUA	0	0	0	0
A05p13570.1_BraTUA	0	0.0146667	0	0
A05p19880.1_BraTUA	0	0	0.029	0.032
A09p08030.1_BraTUA	0	8.903	0	0
A03p16600.1_BraTUA	11.8197	4.71733	13.6397	8.53333
A09p30810.1_BraTUA	5.20567	0	4.756	4.47467
A09p12020.1_BraTUA	0	0.155	0	0
A01p31280.1_BraTUA	0.23	0.00666667	0.107	0.199333
A07p04220.1_BraTUA	0	0.613333	0.00666667	0.028
A01p37690.1_BraTUA	0.743333	0	0.651333	0.694667
A03p14180.1_BraTUA	0	0	0	0
A09p42600.1_BraTUA	0.0216667	0	0	0
A09p57210.1_BraTUA	0.0136667	17.8923	0	0
A02p16440.1_BraTUA	20.396	0	19.6307	17.457
A03p38000.1_BraTUA	0	0	0	0
A05p04420.1_BraTUA	0.0843333	22.1797	0	0
A09p04890.1_BraTUA	24.499	6.07033	21.891	25.3583
A05p32080.1_BraTUA	5.738	6.673	6.818	6.616
A01p47570.1_BraTUA	5.55133	0.263	4.72167	4.63967
A03p51130.1_BraTUA	0.036	0	0.160333	0.328
A06p45320.1_BraTUA	0	0.149667	0	0.005
A08p09700.1_BraTUA	0	195.491	0	0
A06p28470.1_BraTUA	205.689	0	197.972	280.868
A07p37610.1_BraTUA	0	5.02867	0	0
A04p02730.1_BraTUA	2.37367	0.00766667	3.43467	9.197
A09p03330.1_BraTUA	0	0.0313333	0	0
A03p39220.1_BraTUA	0.294	43.1507	0.254667	0
A04p27820.1_BraTUA	46.635	4.87567	37.46	42.8543
A02p14510.1_BraTUA	4.83533	29.1463	5.136	4.297
A10p33790.1_BraTUA	23.443	19.2083	37.446	31.6503
A09p24100.1_BraTUA	17.1547	0	22.348	26.7653
A03p17340.1_BraTUA	0.0716667	0.29	0	0
A01p47960.1_BraTUA	0.016	0.498667	0	0.77
A09p09640.1_BraTUA	0.744333	9.78267	0.626667	0.664667
A02p46320.1_BraTUA	7.4	117.108	10.0247	8.68867
A08p32800.1_BraTUA	338.597	0	421.547	187.335
A02p46920.1_BraTUA	0	2.85133	0	0
A05p27650.1_BraTUA	5.77433	16.602	5.734	2.796
A09p24570.1_BraTUA	11.1723	24.0203	15.8017	16.5367
A10p33390.1_BraTUA	21.8857	0.116667	11.7177	13.464
A07p38820.1_BraTUA	0.058	22.1023	0	0.244667
A07p25180.1_BraTUA	4.12467	0	3.89667	17.686
A03p05190.1_BraTUA	0	0	0	0
A04p20400.1_BraTUA	0.068	7.93667	0.272333	0.207
A10p15300.1_BraTUA	8.68467	81.8757	8.34467	8.017
A02p24760.1_BraTUA	70.2093	1.569	72.884	82.9403
A06p35780.1_BraTUA	1.63467	22.099	1.80433	1.83733
A03p05650.1_BraTUA	20.4527	0.0266667	18.0857	17.9363
A06p22630.1_BraTUA	0	8.92733	0	0.00933333
A06p29010.1_BraTUA	8.13367	0.815	11.6863	11.44
A04p31230.1_BraTUA	0.842667	0	1.153	1.253
A10p07500.1_BraTUA	0	359.063	0	0
A09p50240.1_BraTUA	502.464	0.387333	589.808	504.806
A06p16760.1_BraTUA	0.134667	11.3097	0.0493333	0.269
A06p41550.1_BraTUA	12.5247	6.27033	13.5107	13.187
A06p40430.1_BraTUA	6.39467	26.6733	7.05867	5.48233
A06p18460.1_BraTUA	25.2307	0.214667	25.0213	24.1433
A03p58700.1_BraTUA	0.154667	118.806	0.202	0.29
A06p18150.1_BraTUA	92.329	0	112.804	142.748
A09p38440.1_BraTUA	0	1.86567	0	0
A07p30190.1_BraTUA	3.42467	0	2.928	2.492
A07p44250.1_BraTUA	0	3.14233	0	0
A02p46580.1_BraTUA	3.83933	24.328	5.419	5.11867
A04p18970.1_BraTUA	24.025	0.0623333	26.88	29.0773
A01p17200.1_BraTUA	0	76.0103	0.044	0.0343333
A08p09290.1_BraTUA	66.7233	11.3527	58.219	68.9813
A07p08430.1_BraTUA	10.9883	0	9.715	10.3047
A08p27680.1_BraTUA	0	19.0393	0	0
A09p05610.1_BraTUA	21.4503	0	14.514	15.8087
A09p22290.1_BraTUA	0	8.417	0	0
A09p49720.1_BraTUA	9.54733	0	8.03367	7.605
A02p22680.1_BraTUA	0	36.2857	0	0
A01p48070.1_BraTUA	15.6837	459.447	18.6483	19.9363
A06p08430.1_BraTUA	912.215	0.420667	1250.61	854.32
A08p32950.1_BraTUA	0.989	21.9773	2.19033	0.523333
A10p16160.1_BraTUA	20.6073	0.0686667	24.3227	27.4543
A02p38760.1_BraTUA	0.0196667	1.27567	0.13	0.0753333
A02p05740.1_BraTUA	1.66	0	0.881667	0.641333
A01p14210.1_BraTUA	0	11.991	0	0
A06p05360.1_BraTUA	10.5327	9.91733	10.5117	13.8683
A09p38970.1_BraTUA	9.747	17.1383	7.126	6.046
A06p32250.1_BraTUA	8.63567	0.256	20.1847	35.5287
A02p08390.1_BraTUA	0.092	21.1037	0.241333	0
A05p40600.1_BraTUA	20.972	11.9717	14.6827	16.7793
A07p41480.1_BraTUA	10.5647	39.9503	13.1827	10.5277
A03p48070.1_BraTUA	25.863	27.9187	15.129	31.1537
A09p10460.1_BraTUA	26.438	0.0153333	30.4407	30.0407
A09p33180.1_BraTUA	0.0143333	0	0.0153333	0.016
A04p15480.1_BraTUA	0	0.787	0.015	0.0363333
A01p44440.1_BraTUA	0.746333	9.98533	0.611667	0.547667
A08p22670.1_BraTUA	9.84067	6.14533	19.231	16.5703
A03p01210.1_BraTUA	3.06	0	3.785	5.58667
A01p30140.1_BraTUA	0	0.0243333	0	0
A02p18880.1_BraTUA	0.0686667	6.34833	0	0
A09p09360.1_BraTUA	7.646	0.222333	2.80533	4.029
A08p05510.1_BraTUA	0.947333	0	0	0.281333
A06p29390.1_BraTUA	0	0.605667	0	0
A03p18040.1_BraTUA	0.53	18.878	0.387333	0.366333
A04p23730.1_BraTUA	47.468	183.817	27.7667	23.7597
A08p01500.1_BraTUA	208.527	710.85	162.487	146.005
A08p20200.1_BraTUA	1327.33	0	1695.53	1136.48
A07p35360.1_BraTUA	0	0	0	0
A01p27400.1_BraTUA	0	0.0136667	0	0
A04p18400.1_BraTUA	0	0.021	0.107667	0.029
A05p23370.1_BraTUA	0	0.947333	0	0
A05p25640.1_BraTUA	4.12333	0.743667	1.96033	2.59633
A01p35470.1_BraTUA	0.97	0	1.00767	0.543333
A04p25330.1_BraTUA	0	0	0	0
A01p11270.1_BraTUA	0	11.062	0	0
A04p02740.1_BraTUA	9.80967	41.7267	7.82067	10.0107
A04p00510.1_BraTUA	49.359	0	64.397	52.889
A07p39840.1_BraTUA	0	0	0	0
A06p30180.1_BraTUA	0.0226667	2.56633	0.0673333	0.0376667
A05p11830.1_BraTUA	4.976	0	4.82733	3.1
A10p22650.1_BraTUA	0	34.6537	0	0.0476667
A05p40710.1_BraTUA	29.8697	0	34.6863	37.9763
A01p26260.1_BraTUA	0	8.95133	0	0
A05p28440.1_BraTUA	14.6157	5.16633	21.669	11.1697
A10p11540.1_BraTUA	0.171	1.173	0.222667	1.39133
A01p45340.1_BraTUA	0.0623333	8.016	0.193333	0.513
A01p14720.1_BraTUA	8.60533	434.03	8.89267	8.128
A03p02750.1_BraTUA	37.5347	5.53067	52.9297	357.273
A03p52510.1_BraTUA	5.65033	9.12467	5.69233	6.906
A08p32160.1_BraTUA	11.1803	0	11.5657	12.2417
A09p69310.1_BraTUA	0.015	18.759	0	0
A03p57510.1_BraTUA	18.2303	4.08267	32.2757	29.3193
A06p36240.1_BraTUA	3.524	0.041	3.31267	2.87733
A03p35700.1_BraTUA	0.321	0.935	0.207	0.174667
A01p40660.1_BraTUA	0.052	0	0.694333	0.852667
A09p71330.1_BraTUA	0	0	0	0
A04p13380.1_BraTUA	0.062	0.13	0	0
A02p22060.1_BraTUA	0.166	7.84167	0.0953333	0.077
A05p29150.1_BraTUA	7.59667	1.34067	8.073	7.62767
A07p34880.1_BraTUA	0.829333	151.408	1.006	1.31767
A08p22170.1_BraTUA	191.32	0.145	137.378	133.674
A09p02050.1_BraTUA	0.777333	71.7543	0.0553333	0.131333
A02p29370.1_BraTUA	143.038	4.16433	188.151	118.261
A05p06690.1_BraTUA	4.34	198.96	4.17067	3.71067
A08p10720.1_BraTUA	83.45	25.1973	133.407	253.849
A09p52590.1_BraTUA	31.118	4.63267	18.433	24.0653
A01p40560.1_BraTUA	3.161	0	3.823	3.43767
A09p35880.1_BraTUA	0.0146667	4.579	0.014	0
A06p20830.1_BraTUA	7.49933	25.7317	5.76667	5.81333
A06p34900.1_BraTUA	28.1213	0.0266667	15.3317	10.5123
A09p07320.1_BraTUA	0.012	8.65833	0	0.0143333
A05p07380.1_BraTUA	12.382	49.823	3.325	6.96067
A03p17920.1_BraTUA	42.974	0	47.4947	55.6547
A03p28570.1_BraTUA	0	0	0	0
A08p35680.1_BraTUA	0	12.667	0	0
A02p10040.1_BraTUA	14.388	7.00833	12.856	12.164
A01p15130.1_BraTUA	8.07433	0.0143333	7.857	6.11867
A09p37510.1_BraTUA	0.102667	0	0.0393333	0.0586667
A01p17020.1_BraTUA	0	6.66333	0	0
A09p56600.1_BraTUA	7.21567	0	10.9923	9.75533
A05p16610.1_BraTUA	0	298.387	0	0
A01p25790.1_BraTUA	358.014	0.976667	419.19	344.24
A08p09800.1_BraTUA	1.555	45.681	0.744	1.01933
A05p35100.1_BraTUA	31.2703	14.9473	36.3037	40.1247
A10p19710.1_BraTUA	19.5843	12.444	19.0417	15.307
A06p11050.1_BraTUA	18.058	59.465	15.6057	13.9193
A03p07370.1_BraTUA	54.0647	0.307333	20.2797	43.775
A02p36790.1_BraTUA	0.172333	7.46367	0.175667	0.100333
A04p19290.1_BraTUA	10.9433	0	9.24667	6.814
A08p07620.1_BraTUA	0	0	0	0
A02p39590.1_BraTUA	0	8.288	0	0
A07p30390.1_BraTUA	5.93633	7.20133	7.14333	6.795
A09p17200.1_BraTUA	10.316	0.19	7.44167	5.64167
A02p34840.1_BraTUA	0.528333	0	0.447	0.151333
A02p08510.1_BraTUA	0	0.306333	0	0
A01p37470.1_BraTUA	0.257	0.638333	0.351	0.319
A03p29100.1_BraTUA	1.32633	0.670667	1.20333	1.53633
A02p27340.1_BraTUA	0.864667	5.638	0.819667	0.768333
A07p23620.1_BraTUA	7.49633	0.961667	5.27033	4.15433
A05p08580.1_BraTUA	1.30767	0.812	0.545	0.386667
A03p16410.1_BraTUA	0.755667	0.594667	0.885333	0.413333
A02p13100.1_BraTUA	0.350667	7.831	1.43733	1.23833
A02p28590.1_BraTUA	6.432	101.304	10.167	9.598
A09p57270.1_BraTUA	58.5167	42.1403	63.636	95.6157
A07p21470.1_BraTUA	41.357	0	34.379	33.4857
A07p11250.1_BraTUA	0.0766667	0.181	0	0.0236667
A05p08920.1_BraTUA	0.226	13.4433	0.0373333	0.210333
A09p00030.1_BraTUA	15.3463	2.068	11.562	10.9287
A07p39730.1_BraTUA	2.126	5.74567	2.09333	1.87633
A05p34200.1_BraTUA	6.44867	15.118	6.64767	5.74667
A06p30570.1_BraTUA	12.6203	0	15.053	15.7937
A05p03100.1_BraTUA	0.0346667	0	0.0346667	0.041
A09p28250.1_BraTUA	0	295.892	0	0
A03p29240.1_BraTUA	493.439	0.944333	178.119	273.834
A08p01720.1_BraTUA	0.754333	0	0.664333	0.798
A03p59190.1_BraTUA	0	0	0	0
A07p26900.1_BraTUA	0	0.0406667	0	0
A09p12070.1_BraTUA	0.33	0	0.214667	0.0836667
A04p05500.1_BraTUA	0	18.8193	0	0
A10p21280.1_BraTUA	26.998	0.453	24.4433	18.9267
A02p19270.1_BraTUA	1.45933	0	1.70833	0.546333
A09p18340.1_BraTUA	0	0	0	0
A03p02880.1_BraTUA	0	20.1947	0	0
A07p30340.1_BraTUA	16.5187	9.57633	13.577	16.3947
A06p18280.1_BraTUA	11.4257	3.949	25.508	19.8347
A05p29140.1_BraTUA	5.726	31.969	6.83	7.02133
A07p30840.1_BraTUA	14.4067	0.950667	47.6003	59.5063
A05p00840.1_BraTUA	0.484	0	0.089	0.184333
A08p02700.1_BraTUA	0	2.50467	0.0786667	0
A07p27640.1_BraTUA	3.274	21.1023	2.915	2.41467
A09p68640.1_BraTUA	18.8707	0	23.223	23.3217
A06p04480.1_BraTUA	0	20.2217	0.0203333	0
A08p15970.1_BraTUA	20.4727	119.376	23.3413	23.8227
A05p34330.1_BraTUA	36.4307	5.07533	33.572	122.22
A09p59980.1_BraTUA	3.971	7.27067	2.58033	3.19
A09p06470.1_BraTUA	9.46733	11.1417	5.37467	8.64633
A03p46590.1_BraTUA	12.9073	8.35333	16.0607	12.619
A09p08680.1_BraTUA	7.38133	0	7.87267	10.097
A07p20890.1_BraTUA	0	17.4047	0	0
A10p22720.1_BraTUA	20.1733	3.148	16.177	17.8167
A02p06940.1_BraTUA	2.212	0.0486667	3.213	3.175
A07p27000.1_BraTUA	0.062	1.10867	0.0746667	0.106667
A07p23240.1_BraTUA	1.80333	16.4393	1.05767	0.735
A06p00590.1_BraTUA	21.3857	0	22.0693	13.799
A09p07400.1_BraTUA	0	0	0	0
A08p25010.1_BraTUA	0.0366667	14.8377	0	0
A03p31540.1_BraTUA	27.5013	0	22.236	13.839
A01p30440.1_BraTUA	0	4.62733	0	0
A10p27850.1_BraTUA	4.74933	151.251	5.76733	4.81633
A07p30000.1_BraTUA	180.372	4.95633	257.552	249.64
A01p06040.1_BraTUA	3.15633	9.52467	4.801	6.12533
A03p09170.1_BraTUA	3.92433	3.97267	6.56267	8.14067
A10p25650.1_BraTUA	4.385	0	2.788	2.3
A04p14000.1_BraTUA	0	0.0163333	0	0
A10p35760.1_BraTUA	0.122	0	0.0156667	0.0256667
A03p62190.1_BraTUA	0	73.419	0	0
A01p12870.1_BraTUA	98.1037	0	87.5123	66.987
A03p12200.1_BraTUA	0	25.8087	0	0
A02p16950.1_BraTUA	20.5787	72.6973	23.4457	24.158
A02p08330.1_BraTUA	51.041	0	64.4493	72.957
A04p06870.1_BraTUA	0	0	0	0
A04p13990.1_BraTUA	0.0156667	6.13833	0	0
A09p51720.1_BraTUA	14.9213	0	8.118	5.40833
A03p39190.1_BraTUA	0	0.0206667	0.0483333	0.053
A08p11830.1_BraTUA	0.04	0.678667	0	0
A05p23050.1_BraTUA	0.212333	0.0233333	0.367667	0.845667
A06p14070.1_BraTUA	0.067	18.8717	0.0916667	0
A07p36400.1_BraTUA	16.7683	0	21.2317	22.7647
A04p25140.1_BraTUA	0.0103333	17.212	0	0
A05p30390.1_BraTUA	17.3027	0.512667	16.6113	17.774
A10p23180.1_BraTUA	0.6	1.12833	0.706667	1.25667
A03p32540.1_BraTUA	0.880667	0	0.926333	1.34433
A10p29480.1_BraTUA	0	0.803	0	0
A10p01870.1_BraTUA	1.15867	7.68267	0.583667	0.344
A06p03400.1_BraTUA	5.77133	3.70833	8.878	8.381
A08p00630.1_BraTUA	4.16333	1.97667	4.50367	3.80667
A03p24610.1_BraTUA	2.75933	11.8707	1.915	2.04
A01p03980.1_BraTUA	24.226	0	12.8037	10.6593
A08p08950.1_BraTUA	0.02	23.9307	0.00966667	0
A06p38290.1_BraTUA	5.157	17.756	12.1953	22.52
A09p32490.1_BraTUA	17.9327	0.315	16.5253	16.8613
A10p12920.1_BraTUA	0.0946667	87.4537	0.128333	0.461
A03p22350.1_BraTUA	95.0047	1.81867	112.493	102.013
A02p16980.1_BraTUA	1.55167	0.576	1.83867	1.947
A02p07960.1_BraTUA	1.033	17.1327	0.111333	0.502333
A09p42400.1_BraTUA	11.5503	0	17.5557	13.0023
A09p39730.1_BraTUA	0	1.22567	0	0
A04p24710.1_BraTUA	0.603667	0	0.963667	1.148
A07p04330.1_BraTUA	0	0.183	0	0
A09p09860.1_BraTUA	0.257667	22.8867	0.058	0.0323333
A03p47010.1_BraTUA	35.3297	131.939	22.2827	21.5203
A09p14590.1_BraTUA	188.406	0.009	120.318	113.095
A10p15250.1_BraTUA	0.065	0.223	0.0626667	0.032
A03p15150.1_BraTUA	0.055	8.15333	0	0
A04p23760.1_BraTUA	7.02367	3.613	7.956	9.08367
A06p41860.1_BraTUA	3.64067	0	4.17767	3.341
A05p01030.1_BraTUA	0	0.441333	0.0946667	0
A03p56860.1_BraTUA	0.480667	11.6477	0.451667	0.251
A01p39180.1_BraTUA	5.792	0	9.217	14.5943
A02p07120.1_BraTUA	0	4.16333	0	0.0176667
A08p28430.1_BraTUA	2.70267	8.56433	1.42867	2.165
A01p19570.1_BraTUA	9.46667	43.4343	10.6817	7.70267
A01p10030.1_BraTUA	33.0797	0.478667	46.7087	46.5527
A01p20910.1_BraTUA	1.366	0	0.738	0.518667
A06p29700.1_BraTUA	0	0	0	0
A06p16510.1_BraTUA	0	13.7093	0	0
A08p31470.1_BraTUA	14.5503	76.0597	11.3873	9.37833
A06p27250.1_BraTUA	76.02	0	118.088	90.855
A03p38250.1_BraTUA	0	0.286333	0	0
A09p37080.1_BraTUA	0.166333	0.818	0.765333	0.888
A03p02280.1_BraTUA	0.746	21.1207	0.697333	0.744667
A04p23440.1_BraTUA	9.92	0.713667	13.274	24.355
A09p21720.1_BraTUA	1.67467	18.753	0.512667	0.244
A04p18450.1_BraTUA	14.3887	0	10.2837	11.3433
A04p13910.1_BraTUA	0	15.8847	0	0
A08p34150.1_BraTUA	14.6477	0	14.5597	17.9143
A08p20740.1_BraTUA	0	3.72333	0	0
A05p38170.1_BraTUA	3.64133	13.5047	3.581	3.28
A08p15000.1_BraTUA	15.225	0	14.165	11.6513
A04p26010.1_BraTUA	0	2.20733	0	0
A01p33650.1_BraTUA	3.706	53.532	1.90933	2.15633
A02p19000.1_BraTUA	79.3643	0	49.0077	58.392
A01p06090.1_BraTUA	0	88.361	0	0
A01p02800.1_BraTUA	44.979	10.8763	62.6857	98.86
A09p55540.1_BraTUA	16.055	0.849667	17.0597	12.05
A03p00690.1_BraTUA	0.649667	7.26067	1.15667	2.77933
A09p35160.1_BraTUA	8.64467	0.428333	7.37267	6.00533
A07p02740.1_BraTUA	0.498333	0.221	0.671333	0.391333
A06p43430.1_BraTUA	0.022	0.322	0.044	0.238333
A03p04000.1_BraTUA	0.077	19.0027	0.051	0.175667
A09p05020.1_BraTUA	18.2837	0	15.165	15.4187
A07p11380.1_BraTUA	0	9.29733	0	0
A02p19400.1_BraTUA	9.31567	0.452	9.12133	6.098
A09p09030.1_BraTUA	0.210667	21.2663	0.385667	0.51
A07p13090.1_BraTUA	14.4833	20.469	20.64	24.252
A08p30910.1_BraTUA	8.912	2.75967	7.60767	10.6093
A09p69430.1_BraTUA	5.26733	36.8143	6.623	0.951
A05p28390.1_BraTUA	38.9043	0	40.776	32.092
A07p34230.1_BraTUA	0.0206667	4.237	0.0193333	0.101
A01p16690.1_BraTUA	2.971	8.708	13.9953	9.79633
A05p35970.1_BraTUA	4.42	0.009	12.7563	11.3787
A09p42520.1_BraTUA	0.00833333	1.96067	0.0176667	0.0203333
A09p37010.1_BraTUA	2.189	0.111667	2.31433	1.851
A09p27590.1_BraTUA	0.0223333	0.378667	0.0286667	0.09
A06p11890.1_BraTUA	22.4903	0	16.976	0.373667
A05p29620.1_BraTUA	0.106	133.294	0	0
A01p05710.1_BraTUA	122.398	0	144.077	145.202
A04p15670.1_BraTUA	0	0	0	0
A05p25930.1_BraTUA	0	12.066	0	0
A02p03770.1_BraTUA	7.28933	0	9.247	10.733
A07p16310.1_BraTUA	0	15.3017	0.062	0
A03p17350.1_BraTUA	15.7007	1.01267	16.9333	19.084
A07p03250.1_BraTUA	0.999667	0	0.769333	0.754333
A05p32840.1_BraTUA	0	21.0127	0	0
A03p51280.1_BraTUA	32.1573	0.527	28.8973	22.844
A03p34810.1_BraTUA	0.387	15.5653	0.41	0.661667
A07p41340.1_BraTUA	13.9933	0	17.3257	16.9893
A02p00040.1_BraTUA	0	0	0	0
A05p17670.1_BraTUA	0	0.047	0	0
A05p18320.1_BraTUA	0.224333	0	0.606	0.185
A09p39380.1_BraTUA	0	0.434333	0	0
A10p12160.1_BraTUA	0.603667	0	0.329333	0.324667
A06p44440.1_BraTUA	0	0	0	0
A09p40570.1_BraTUA	0	0	0	0
A09p28650.1_BraTUA	0	9.21567	0	0.0716667
A06p38330.1_BraTUA	10.5513	0	9.74067	8.75167
A03p06010.1_BraTUA	0	0.516667	0	0
A08p35350.1_BraTUA	0.763	0.122333	0.717	0.723667
A06p45000.1_BraTUA	0.0206667	1.38433	0.0853333	0.222
A08p03490.1_BraTUA	4.30567	0	3.605	4.849
A05p04490.1_BraTUA	0	0.048	0	0
A05p26400.1_BraTUA	0.293333	0	0.0933333	0.338333
A04p28260.1_BraTUA	0.0693333	23.745	0.0133333	0.0156667
A03p61590.1_BraTUA	16.833	0.131	18.65	41.8513
A05p07860.1_BraTUA	0.317333	0	0.0803333	0.122
A02p40750.1_BraTUA	0	0	0	0
A06p44860.1_BraTUA	0	0	0	0
A01p02970.1_BraTUA	0	8.622	0	0
A03p07680.1_BraTUA	6.90133	127.774	9.32867	8.723
A09p47280.1_BraTUA	169.101	3.812	158.058	163.118
A03p18780.1_BraTUA	4.19667	3.762	3.30767	2.92867
A02p19750.1_BraTUA	3.19367	0	2.831	2.10533
A05p27620.1_BraTUA	0	55.413	0	0
A01p44030.1_BraTUA	49.6347	5.155	44.3773	46.9383
A03p06370.1_BraTUA	4.02467	1.119	4.40167	4.324
A08p33530.1_BraTUA	1.12367	11.266	0.908	0.485667
A03p33820.1_BraTUA	13.7087	37.195	12.019	11.058
A09p01890.1_BraTUA	36.8673	0.427	33.4653	32.5187
A07p39860.1_BraTUA	0.0616667	1.932	0	0.528333
A10p04730.1_BraTUA	3.16733	0.160333	1.39433	0.896333
A03p49290.1_BraTUA	0.285667	311.038	0.126	0.151667
A08p05600.1_BraTUA	143.893	5.97167	105.355	257.499
A10p17070.1_BraTUA	5.176	0	5.16	4.66733
A02p44220.1_BraTUA	0	5.553	0	0
A08p16620.1_BraTUA	6.13933	31.6563	6.344	6.42733
A09p05300.1_BraTUA	48.3743	42.549	45.1657	34.4267
A10p01910.1_BraTUA	38.009	41.6897	37.4303	40.7023
A09p07420.1_BraTUA	1.52833	1.13433	14.446	28.5323
A03p01940.1_BraTUA	0.687333	38.6047	0.527333	1.213
A06p07940.1_BraTUA	18.0037	65.08	15.249	37.6933
A08p36070.1_BraTUA	53.9433	0	56.1933	75.6013
A09p31160.1_BraTUA	0	1.46067	0	0
A07p24340.1_BraTUA	2.01267	0.392667	3.032	2.06133
A09p18670.1_BraTUA	0.263333	14.4113	0.0516667	0.190333
A09p04410.1_BraTUA	12.88	0	11.9977	10.916
A07p16260.1_BraTUA	0	0.627667	0	0
A09p31900.1_BraTUA	0.242667	77.9503	0.286	0.168333
A01p36120.1_BraTUA	79.262	0.892	52.7593	37.758
A02p03820.1_BraTUA	0.934	2.08233	0.160333	0.421
A04p16530.1_BraTUA	1.82133	0	1.192	1.498
A03p45820.1_BraTUA	0	12.1677	0	0
A05p28140.1_BraTUA	12.2267	52.2153	18.0923	17.847
A03p45130.1_BraTUA	24.0627	0.916667	21.0747	46.8927
A06p43650.1_BraTUA	0.771333	17.4247	0.587	0.734667
A06p41070.1_BraTUA	15.898	0	21.6753	20.037
A04p07750.1_BraTUA	0	0	0	0
A05p13810.1_BraTUA	0	1.051	0	0
A10p17740.1_BraTUA	1.82967	0.186667	1.60567	0.906
A03p25700.1_BraTUA	0.444	0.307	0.285333	0.195667
A02p10690.1_BraTUA	0.596333	0	1.095	0.479333
A06p38810.1_BraTUA	0.0183333	8.40433	0	0.0613333
A06p19310.1_BraTUA	6.74067	31.5993	6.47767	6.38133
A03p10470.1_BraTUA	30.2953	2.56933	35.326	36.3277
A10p03070.1_BraTUA	1.82367	19.368	1.77667	1.85033
A02p04870.1_BraTUA	18.754	0	16.5103	17.9607
A10p11680.1_BraTUA	0	31.865	0	0
A03p41270.1_BraTUA	42.698	0.285333	53.317	46.5007
A05p33210.1_BraTUA	0.210667	1.40933	0.211333	0.245333
A10p34020.1_BraTUA	2.85567	0.405333	2.805	2.452
A05p41770.1_BraTUA	3.644	54.3647	1.29367	0.633
A06p42340.1_BraTUA	55.9587	0	39.066	33.5683
A01p29230.1_BraTUA	0	79.475	0	0
A07p32140.1_BraTUA	49.5897	37.3	54.5077	71.723
A08p16170.1_BraTUA	42.0017	4.13867	44.9237	39.549
A09p15330.1_BraTUA	4.18767	1.38	5.157	4.70133
A06p05850.1_BraTUA	0.722333	2.09267	2.33967	2.817
A10p33840.1_BraTUA	0.738333	0	1.73967	1.61767
A06p21740.1_BraTUA	0	20.1053	0	0
A05p10770.1_BraTUA	24.0077	12.9657	22.2463	22.0523
A05p10080.1_BraTUA	13.6387	9.50233	12.8103	11.701
A10p28320.1_BraTUA	12.3107	24.057	11.9467	10.3563
A01p33670.1_BraTUA	22.1277	0.111	27.274	29.6033
A02p26490.1_BraTUA	0.315667	2.387	0.976	0.665333
A05p15250.1_BraTUA	2.282	1.86333	2.61067	2.406
A08p34740.1_BraTUA	2.03033	0.061	1.88933	2.518
A01p02760.1_BraTUA	0	0	0.0606667	0.231
A10p06640.1_BraTUA	0	1.62833	0	0
A01p05420.1_BraTUA	2.299	0	1.451	1.707
A04p24400.1_BraTUA	0.036	0	0.0193333	0
A05p32010.1_BraTUA	0	2.22633	0	0
A09p21810.1_BraTUA	3.00833	0	3.28533	2.67967
A04p07320.1_BraTUA	0	0.0373333	0	0
A01p39000.1_BraTUA	0.011	0	0.0223333	0
A07p35770.1_BraTUA	0	0	0	0
A09p51870.1_BraTUA	0	42.428	0	0.0436667
A05p38790.1_BraTUA	34.179	47.3387	42.7277	44.084
A10p01820.1_BraTUA	61.237	7.66767	47.9757	38.4553
A03p47330.1_BraTUA	10.0467	9.42633	9.036	2.05833
A07p43780.1_BraTUA	7.23	8.12733	2.413	2.97233
A03p04730.1_BraTUA	6.85767	19.2563	7.052	8.25
A08p21120.1_BraTUA	22.9167	0	19.9997	19.5097
A10p17840.1_BraTUA	0	0	0.139667	0
A04p15830.1_BraTUA	0	4.34433	0	0
A06p02920.1_BraTUA	4.27033	185.606	4.147	4.22733
A07p36360.1_BraTUA	239.941	25.117	151.324	155.006
A01p01180.1_BraTUA	10.15	0	13.1857	15.302
A10p06930.1_BraTUA	0	0.026	0	0
A02p26660.1_BraTUA	0.039	0.04	0.00866667	0.0183333
A01p14260.1_BraTUA	0	25.9233	0	0
A10p06900.1_BraTUA	24.268	0	28.5457	21.9457
A05p22130.1_BraTUA	0	17.4583	0	0
A03p27210.1_BraTUA	12.0847	0.048	13.4907	12.1983
A06p21920.1_BraTUA	0	0	0	0.206667
A06p03800.1_BraTUA	0	1.33367	0	0.0286667
A01p36560.1_BraTUA	0.992667	0	0.614667	1.87033
A03p57570.1_BraTUA	0	0	0	0
A09p01620.1_BraTUA	0	4.755	0	0
A02p34160.1_BraTUA	5.86633	1.03167	5.65333	2.19567
A10p24420.1_BraTUA	0.545333	9.743	1.14633	1.352
A02p43450.1_BraTUA	6.35533	0	11.0083	10.4777
A01p05660.1_BraTUA	0	8.83333	0	0
A03p46690.1_BraTUA	2.33567	0.0196667	4.669	14.788
A02p28760.1_BraTUA	0.055	13.5957	0.0376667	0
A09p39430.1_BraTUA	12.8083	0	17.208	15.9753
A03p56890.1_BraTUA	0	6.867	0	0
A10p30040.1_BraTUA	10.8067	0.633333	6.37433	7.31233
A08p01460.1_BraTUA	0.148	14.2293	0.212	0.463333
A04p19040.1_BraTUA	14.5927	0.0183333	16.4137	15.043
A01p05440.1_BraTUA	0	18.4037	0.034	0
A09p68200.1_BraTUA	17.6307	0.0136667	21.4587	21.7557
A03p02260.1_BraTUA	0	10.3123	0	0
A01p45070.1_BraTUA	7.953	1.362	10.354	10.285
A09p33250.1_BraTUA	1.268	8.502	0.318333	0.211
A09p71060.1_BraTUA	7.729	4.33633	9.36633	8.692
A07p10900.1_BraTUA	5.745	0	3.50533	3.44833
A02p24910.1_BraTUA	0	0	0	0
A07p10830.1_BraTUA	0	0.114667	0	0
A10p07760.1_BraTUA	0.299667	11.412	0	0
A02p34290.1_BraTUA	12.0567	11.1243	9.56767	10.337
A09p70230.1_BraTUA	11.3687	0	12.5747	12.8227
A03p23840.1_BraTUA	0	4.01333	0.147333	0
A03p17490.1_BraTUA	4.28867	0.0566667	2.19	2.591
A09p12700.1_BraTUA	0.011	2.23933	0.12	0.0963333
A04p22990.1_BraTUA	1.22267	0.948	2.048	2.103
A09p00630.1_BraTUA	2.38567	0.262333	1.59933	0.800333
A02p03640.1_BraTUA	0.168	0.166333	0.514667	0.85
A02p45690.1_BraTUA	0.189667	0.0126667	0.0506667	0.248667
A05p01780.1_BraTUA	0.0123333	0.810667	0.0586667	0.013
A07p16760.1_BraTUA	1.309	16.6533	0.586	0.313333
A02p36870.1_BraTUA	9.428	3.373	8.22433	11.236
A01p45460.1_BraTUA	3.47367	10.1573	1.91133	1.741
A05p03030.1_BraTUA	9.77167	0	10.223	11.102
A02p14440.1_BraTUA	0	62.7137	0	0
A10p33300.1_BraTUA	55.123	24.459	61.7407	64.0937
A01p47520.1_BraTUA	22.0363	30.6077	16.718	22.662
A02p12460.1_BraTUA	25.079	5.55933	23.322	26.8113
A04p30910.1_BraTUA	8.17067	8.622	4.41367	3.25833
A03p21230.1_BraTUA	6.89	0	7.773	10.4847
A02p16190.1_BraTUA	0	0	0	0
A06p33750.1_BraTUA	0	0.54	0	0
A10p15940.1_BraTUA	1.099	2.25667	1.83533	0.394
A09p63360.1_BraTUA	2.90833	0	2.11967	1.893
A10p27420.1_BraTUA	0	0.00966667	0	0
A03p01290.1_BraTUA	0.00966667	21.0853	0.0586667	0.0216667
A10p35650.1_BraTUA	21.0453	0.0933333	31.0313	30.7907
A08p11130.1_BraTUA	0.105333	8.92533	0.0546667	0.0356667
A02p20290.1_BraTUA	31.467	0	9.63033	9.14867
A09p63040.1_BraTUA	0	132.579	0	0
A02p47700.1_BraTUA	122.396	0	140.898	130.008
A04p17390.1_BraTUA	0	0	0.012	0
A03p49640.1_BraTUA	0	0	0	0
A10p19320.1_BraTUA	0	17.7223	0	0
A06p30390.1_BraTUA	17.396	0	18.8743	18.9383
A05p38220.1_BraTUA	0	19.8633	0	0
A02p27680.1_BraTUA	22.524	4.821	13.2893	10.4457
A05p31080.1_BraTUA	4.71833	33.0287	4.41133	3.16133
A08p12130.1_BraTUA	51.4877	5.93433	70.496	50.4067
A05p31380.1_BraTUA	33.7007	2.854	8.95067	3.52733
A02p12840.1_BraTUA	2.45733	12.0563	1.75167	1.43133
A03p14340.1_BraTUA	11.201	0.0483333	11.1557	10.989
A09p24810.1_BraTUA	0.137333	4.02433	0.0423333	0.025
A09p67720.1_BraTUA	9.66133	0.0126667	4.93933	2.65067
A02p44350.1_BraTUA	0	2.02733	0.0486667	0
A03p27630.1_BraTUA	1.339	5.96967	1.95633	1.52833
A08p36460.1_BraTUA	9.38767	2.454	6.126	4.893
A05p01050.1_BraTUA	0.177	1.226	0.691667	1.268
A07p43540.1_BraTUA	0.42	0	0.862667	1.27633
A04p30530.1_BraTUA	0.0193333	0.330667	0.0193333	0.023
A10p34700.1_BraTUA	0.673	0	0.681667	1.30367
A10p10770.1_BraTUA	0	0	0	0
A09p57070.1_BraTUA	0	0	0	0.02
A05p21000.1_BraTUA	0	22.4197	0	0
A06p11940.1_BraTUA	26.527	0.0726667	16.248	21.3773
A07p07390.1_BraTUA	0	3.55033	0.0486667	0.151
A04p00640.1_BraTUA	3.75233	0.590667	4.46733	7.55767
A09p30150.1_BraTUA	1.221	8.02567	2.10833	3.57367
A02p41420.1_BraTUA	4.288	0	4.74867	13.6053
A03p62900.1_BraTUA	0	0.0576667	0	0
A01p28570.1_BraTUA	0	8.44967	0.026	0
A01p35670.1_BraTUA	4.07767	3.71933	4.93867	7.518
A09p04930.1_BraTUA	3.45	0	2.90867	2.6
A08p10240.1_BraTUA	0	38.7827	0.077	0.0443333
A03p60070.1_BraTUA	40.9363	0	38.0367	30.619
A09p02090.1_BraTUA	0	52.4387	0	0
A10p29100.1_BraTUA	61.059	0	64.9543	53.0753
A03p57450.1_BraTUA	0.226	0	0	0
A06p41130.1_BraTUA	0	0	0	0
A07p19750.1_BraTUA	0	2.83567	0	0
A07p02390.1_BraTUA	1.939	15.177	2.56	2.031
A03p39310.1_BraTUA	42.3357	0	20.2907	21.9227
A09p37590.1_BraTUA	0	12.927	0.0426667	0
A01p03090.1_BraTUA	7.79667	24.7987	16.5537	24.569
A02p02140.1_BraTUA	23.205	0.085	19.7893	20.87
A10p28180.1_BraTUA	0.398667	0	0.019	0.142333
A03p52660.1_BraTUA	0	0.0673333	0	0
A10p02370.1_BraTUA	0.0826667	0.572	0.062	0.076
A06p19060.1_BraTUA	0	0.242333	0.237667	0
A05p30160.1_BraTUA	0.257	0	0.0626667	0.0833333
A03p50660.1_BraTUA	0	0.356333	0	0
A04p00150.1_BraTUA	0.322	27.1797	0.273333	0.282333
A04p29460.1_BraTUA	26.301	0	44.545	32.7773
A07p32430.1_BraTUA	0	3.69567	0	0.0876667
A07p18870.1_BraTUA	4.388	106.193	4.69667	3.80833
A10p18940.1_BraTUA	103.506	0.492333	123.441	125.582
A08p05150.1_BraTUA	0.530667	4.75033	0.218667	0.181667
A04p11100.1_BraTUA	8.35433	0.098	12.389	4.063
A04p18010.1_BraTUA	0.262	1031.83	0.230333	0.0553333
A05p12420.1_BraTUA	1296.35	19.743	1563.03	1276.82
A05p06760.1_BraTUA	17.4703	0.231	26.1893	23.7347
A09p61170.1_BraTUA	0.108	0	0.282	0.0626667
A09p46030.1_BraTUA	0	10.6703	0	0
A06p04560.1_BraTUA	12.953	0.0616667	15.519	11.315
A01p35610.1_BraTUA	0.035	71.9197	0.0346667	0.0126667
A07p09520.1_BraTUA	7.882	2.716	9.26633	59.2687
A03p21190.1_BraTUA	3.05	7.56667	2.486	2.03933
A01p47610.1_BraTUA	5.104	0.007	4.515	4.49
A06p12250.1_BraTUA	0.014	0.058	0.014	0.0153333
A07p28370.1_BraTUA	0.0133333	0.046	0.097	0.179667
A10p07830.1_BraTUA	0	35.9103	0	0
A03p42060.1_BraTUA	25.1443	14.651	24.8153	30.3933
A07p00600.1_BraTUA	23.3473	0	28.3517	20.479
A01p18450.1_BraTUA	0.0226667	0.169667	0	0
A06p13130.1_BraTUA	0.261333	5.915	0.203333	0.130667
A05p25150.1_BraTUA	6.91233	61.5137	6.694	5.62933
A02p13020.1_BraTUA	58.822	0	65.231	56.1717
A03p10320.1_BraTUA	0.055	21.281	0.0526667	0.177
A06p07200.1_BraTUA	26.7407	107.544	41.5807	32.417
A01p16970.1_BraTUA	90.55	19.786	83.1423	86.123
A07p09980.1_BraTUA	18.5803	4.20633	12.1677	11.1053
A09p35820.1_BraTUA	3.061	18.7797	3.807	3.464
A03p04230.1_BraTUA	3.47333	7.24267	6.00467	17.1363
A08p04930.1_BraTUA	7.38067	0.175	5.38367	7.991
A05p29180.1_BraTUA	0.208	5.53367	0.298	0.201
A06p10690.1_BraTUA	6.24733	18.9187	5.46667	5.523
A09p11490.1_BraTUA	19.0487	0	16.9887	17.5427
A09p11210.1_BraTUA	0	2.548	0	0.0933333
A01p33220.1_BraTUA	0.705667	0	2.557	1.677
A03p36030.1_BraTUA	0	0	0.0203333	0
A08p25720.1_BraTUA	0	0.264667	0	0
A02p16030.1_BraTUA	0.253	0.818333	0.149333	0.0963333
A05p20910.1_BraTUA	1.61733	0.0386667	0.563333	0.932333
A01p13810.1_BraTUA	0.0766667	7.11433	0	0
A07p37470.1_BraTUA	6.87633	5.04433	6.01633	5.89833
A05p06710.1_BraTUA	22.5667	0.02	8.069	3.70667
A03p17740.1_BraTUA	0.106	0.069	0.0653333	0.0456667
A05p07280.1_BraTUA	0	1.72767	0	0.075
A02p44110.1_BraTUA	0.565667	0.731667	2.27333	2.12033
A06p38200.1_BraTUA	0.515667	3.706	0.221333	0.293667
A09p45820.1_BraTUA	5.53467	27.3253	3.61233	3.64867
A05p24340.1_BraTUA	20.9933	5.444	38.5857	35.8097
A01p12110.1_BraTUA	2.64933	0.122	1.855	4.63933
A03p02610.1_BraTUA	0.172	0	0.262	0.309
A09p22630.1_BraTUA	0.013	5.229	0.012	0
A05p01710.1_BraTUA	3.86733	0.402667	3.432	4.14833
A09p27110.1_BraTUA	0.319333	14.4417	0.38	0.418
A05p01080.1_BraTUA	16.685	5.46567	17.6593	13.6897
A07p38590.1_BraTUA	3.83	6.27233	3.07	3.01667
A06p16900.1_BraTUA	6.432	0.094	6.24667	6.75867
A06p15730.1_BraTUA	0	0	0	0.145333
A10p12030.1_BraTUA	0.0126667	22.704	0	0
A09p26370.1_BraTUA	17.8167	5.27033	23.222	21.1503
A02p04000.1_BraTUA	10.453	0	6.53	6.35067
A04p12890.1_BraTUA	0	9.71667	0	0
A02p12130.1_BraTUA	5.862	7.72367	5.31233	10.072
A04p21040.1_BraTUA	5.54367	25.7903	6.78233	8.22933
A04p29350.1_BraTUA	6.85433	0	15.2843	29.8463
A03p27520.1_BraTUA	0	7.83833	0	0
A03p36470.1_BraTUA	34.2563	579.121	26.0543	12.206
A03p28540.1_BraTUA	696.768	38.3133	890.63	778.981
A01p21280.1_BraTUA	49.8773	154.071	59.6187	50.3803
A06p45120.1_BraTUA	117.938	0.153667	104.432	109.218
A06p27930.1_BraTUA	0.05	0	0.0963333	0.115667
A01p47550.1_BraTUA	0.0473333	2.36733	0.0253333	0
A09p13020.1_BraTUA	1.41967	116.999	1.13967	1.28067
A07p22670.1_BraTUA	214.759	0.533333	129.368	137.327
A06p17840.1_BraTUA	0.361333	14.152	0.397	0.085
A05p02750.1_BraTUA	14.1287	0	13.7427	16.0447
A04p21130.1_BraTUA	0	37.4163	0	0.0266667
A02p13560.1_BraTUA	41.3137	68.6743	38.6753	30.6647
A07p38610.1_BraTUA	45.1163	4.061	50.7093	75.7427
A05p22820.1_BraTUA	8.28533	0.059	3.207	4.12133
A04p22450.1_BraTUA	0.138	29.8783	0.219	0.346333
A04p15470.1_BraTUA	26.069	0	41.6077	38.077
A09p46780.1_BraTUA	0	0	0	0
A07p17420.1_BraTUA	0	0	0	0
A04p12690.1_BraTUA	0	0.459333	0	0
A02p06880.1_BraTUA	0.38	0.896333	0.253	0.594
A06p11760.1_BraTUA	1.397	0	1.84933	1.37233
A10p25240.1_BraTUA	0	0.037	0	0
A08p29600.1_BraTUA	0.0743333	60.1197	0.447	0.398333
A07p24420.1_BraTUA	77.6853	0	91.7623	65.7187
A05p19860.1_BraTUA	0	31.9073	0	0
A05p34880.1_BraTUA	18.992	0	26.4553	33.349
A09p44270.1_BraTUA	0	28.877	0	0
A03p22050.1_BraTUA	27.9653	0	33.7747	38.4317
A08p17730.1_BraTUA	0	9.182	0	0
A08p06920.1_BraTUA	13.1153	0	9.708	9.83
A04p03100.1_BraTUA	0	0.0216667	0	0
A09p45300.1_BraTUA	0.03	77.3367	0.0603333	0
A08p28640.1_BraTUA	22.179	3.15867	29.5543	119.32
A06p15200.1_BraTUA	2.34067	2.37433	2.33133	3.069
A09p32700.1_BraTUA	2.169	2.25967	1.48333	1.27333
A06p08880.1_BraTUA	1.723	39.158	1.58933	2.974
A05p10000.1_BraTUA	37.879	0	45.347	41.8813
A08p03910.1_BraTUA	0	1.51533	0	0
A06p31760.1_BraTUA	3.51467	0.089	2.10167	2.054
A08p29970.1_BraTUA	0.052	2.73633	0.0313333	0
A06p21680.1_BraTUA	2.69167	0	2.544	3.164
A09p42420.1_BraTUA	0	0	0	0
A07p12990.1_BraTUA	0	0.353667	0.075	0.029
A06p35240.1_BraTUA	0.144667	0	0.168667	0.761333
A08p11470.1_BraTUA	0.0703333	13.409	0.138333	0.325
A09p44130.1_BraTUA	13.6543	0	14.3517	13.5833
A03p37410.1_BraTUA	0	0	0	0
A01p21710.1_BraTUA	0	28.7093	0.0133333	0.033
A07p03210.1_BraTUA	23.2453	0.03	17.564	22.4417
A04p31750.1_BraTUA	0.058	0	0.0153333	0.064
A10p19440.1_BraTUA	0	97.3673	0	0
A07p15480.1_BraTUA	144.281	431.908	190.255	156.328
A03p39820.1_BraTUA	841.01	2.716	881.559	648.028
A02p16590.1_BraTUA	0.988667	0	1.283	2.25033
A01p06550.1_BraTUA	0	1.57067	0	0
A10p01660.1_BraTUA	0.541	0	0.25	1.13
A09p31690.1_BraTUA	0	2.97267	0.02	0
A09p21150.1_BraTUA	1.41267	2.78767	2.29067	2.81733
A06p17660.1_BraTUA	2.20267	2.17867	2.86733	2.346
A01p10360.1_BraTUA	2.64467	37.1047	2.28733	2.314
A03p38130.1_BraTUA	81.1447	2.28333	32.0907	26.0593
A04p07790.1_BraTUA	1.50033	0.121667	0.391667	0.719333
A01p43780.1_BraTUA	0.0133333	0	0.206	0.328333
A07p18500.1_BraTUA	0	7.17367	0	0
A05p26070.1_BraTUA	6.71767	4.741	6.173	7.029
A07p07000.1_BraTUA	4.65733	0.332333	5.24933	4.40633
A07p20770.1_BraTUA	0.525667	0	0.252333	0.253667
A05p18780.1_BraTUA	0	0	0	0
A05p14870.1_BraTUA	0	2.92867	0	0
A05p02020.1_BraTUA	2.95467	0.571333	2.559	2.28367
A03p05350.1_BraTUA	1.471	13.8363	0.710333	0.440667
A10p26680.1_BraTUA	11.2007	21.8183	14.4823	18.4557
A07p12250.1_BraTUA	21.7743	13.263	20.81	22.0423
A04p00160.1_BraTUA	11.069	3.60267	12.3323	13.0263
A10p26810.1_BraTUA	1.038	0	0.802	5.94433
A09p37310.1_BraTUA	0	24.6713	0	0
A02p27650.1_BraTUA	32.03	4.91633	36.139	33.7917
A09p53560.1_BraTUA	5.587	15.208	5.586	5.72567
A09p57880.1_BraTUA	14.1737	39.4443	14.672	17.338
A03p16830.1_BraTUA	108.059	27.1487	34.605	15.9913
A03p21550.1_BraTUA	19.179	121.049	20.888	28.0893
A02p06750.1_BraTUA	85.6903	23.7553	95.4003	103.405
A02p37410.1_BraTUA	28.0873	0	41.613	29.0317
A08p11920.1_BraTUA	0	4.02067	0	0
A04p20420.1_BraTUA	4.35767	3.363	4.638	4.17267
A09p61590.1_BraTUA	3.80933	0.242	4.30633	3.23367
A08p17620.1_BraTUA	0.251667	7.332	0.101	0
A04p15950.1_BraTUA	6.48467	0	6.55567	7.135
A10p10550.1_BraTUA	0	14.304	0.0533333	0
A09p32590.1_BraTUA	13.0053	3.732	14.577	18.1963
A07p40430.1_BraTUA	3.036	0	7.382	6.067
A09p58090.1_BraTUA	0	2.623	0	0
A10p04150.1_BraTUA	1.592	8.3	1.52633	1.22333
A06p25290.1_BraTUA	7.88167	6.24733	8.51467	9.445
A03p11670.1_BraTUA	7.686	0	11.4843	7.319
A08p27780.1_BraTUA	0	0	0	0
A09p06950.1_BraTUA	0	0.0663333	0	0
A04p27170.1_BraTUA	0	8.421	0	0
A03p53850.1_BraTUA	8.05133	0	8.31933	8.885
A09p23240.1_BraTUA	0.0213333	0	0	0
A08p08140.1_BraTUA	0	11.912	0	0
A02p16780.1_BraTUA	11.718	0.083	10.1627	12.568
A09p41470.1_BraTUA	0.112667	7.50767	0.039	0.0903333
A03p17720.1_BraTUA	8.69367	0	5.317	5.543
A03p10640.1_BraTUA	0	1.47	0.022	0
A04p29840.1_BraTUA	1.78433	18.4453	1.64567	0.746333
A03p05860.1_BraTUA	20.8103	0	33.761	28.1433
A06p22740.1_BraTUA	0	6.50933	0	0
A09p41180.1_BraTUA	1.37667	93.0677	0.730333	3.18833
A10p25920.1_BraTUA	65.938	17.1547	98.146	97.6337
A09p02380.1_BraTUA	17.9333	14.054	22.6507	20.49
A09p26350.1_BraTUA	15.8377	0	14.8033	12.545
A05p09210.1_BraTUA	0	0	0	0
A09p45970.1_BraTUA	0	0	0	0
A02p28920.1_BraTUA	0	0	0	0
A10p19350.1_BraTUA	0	0	0.019	0
A02p32320.1_BraTUA	0.025	23.0243	0	0
A05p38280.1_BraTUA	30.6947	0	24.691	16.6363
A01p30940.1_BraTUA	0	0	0.0393333	0
A10p27010.1_BraTUA	0	0	0	0
A09p38890.1_BraTUA	0	0.397	0	0
A07p35540.1_BraTUA	0.27	0	0.126667	0.228
A07p13880.1_BraTUA	0	2.10467	0	0
A04p08310.1_BraTUA	1.71267	4.20133	2.59833	2.274
A09p09290.1_BraTUA	8.24867	92.852	11.4877	9.53167
A07p00800.1_BraTUA	45.831	0.308333	85.2233	67.0893
A03p24490.1_BraTUA	0.312	71.617	0.514667	0.849667
A07p17640.1_BraTUA	53.0343	1.09267	66.0037	88.9703
A06p15090.1_BraTUA	2.00533	0.528667	2.51667	1.26867
A05p32300.1_BraTUA	0.56	0.325333	0.487333	1.02033
A08p18000.1_BraTUA	0.322667	6.66033	0.988333	0.590667
A09p71270.1_BraTUA	9.444	46.2657	9.76667	8.51567
A01p13150.1_BraTUA	38.351	10.289	50.9747	57.6073
A06p29790.1_BraTUA	9.53733	29.971	8.49967	9.98867
A07p43160.1_BraTUA	35.4377	0	37.368	31.4
A02p25670.1_BraTUA	0	12.434	0	0
A01p44140.1_BraTUA	25.9097	16.8177	30.0013	20.043
A05p39180.1_BraTUA	16.067	7.87333	30.2453	21.5083
A01p40950.1_BraTUA	0.436	0.0616667	1.49767	2.205
A02p09590.1_BraTUA	0	10.5193	0	0.036
A07p06900.1_BraTUA	12.0773	2.23733	9.015	10.316
A01p11250.1_BraTUA	2.193	3.39733	1.58167	1.24333
A09p24080.1_BraTUA	1.57133	2.99233	3.18	4.24733
A09p13160.1_BraTUA	2.35	0	2.48133	2.49933
A01p46940.1_BraTUA	0	0.550333	0	0
A04p00050.1_BraTUA	0.553333	2.006	0.482333	0.475
A08p31230.1_BraTUA	2.296	0	2.278	1.885
A10p08230.1_BraTUA	0	0.446667	0	0
A03p20090.1_BraTUA	1.319	121.084	0.375	0.157667
A08p27290.1_BraTUA	92.8723	13.1103	91.1683	119.78
A08p02070.1_BraTUA	13.4657	0	16.7697	19.119
A03p27800.1_BraTUA	0	0.103	0	0.0343333
A05p12870.1_BraTUA	0.0323333	15.8847	0	0.105667
A09p11920.1_BraTUA	14.6243	1.144	15.0707	15.5473
A09p06490.1_BraTUA	7.67367	18.956	0.658	1.10433
A03p07590.1_BraTUA	15.8073	6.91	17.5307	15.472
A03p30820.1_BraTUA	7.44333	10.7257	10.9927	9.56933
A06p26180.1_BraTUA	12.6003	41.224	12.2003	12.0897
A04p16600.1_BraTUA	32.9597	2.98033	33.4453	42.8823
A04p00520.1_BraTUA	3.86433	2.79467	4.66567	3.419
A07p25820.1_BraTUA	2.5	0	2.96433	2.82033
A03p30680.1_BraTUA	0	20.3533	0	0
A04p11920.1_BraTUA	15.126	0	26.9747	20.2573
A02p42670.1_BraTUA	0	31.631	0	0
A03p31640.1_BraTUA	34.7887	0	29.6147	29.8727
A10p06180.1_BraTUA	0	2.79333	0	0
A06p21230.1_BraTUA	1.75033	0	4.207	3.20767
A09p24500.1_BraTUA	0	10.8953	0	0
A05p30320.1_BraTUA	11.6997	0.0106667	12.7813	10.6147
A09p55700.1_BraTUA	0	6.037	0.0413333	0.0116667
A06p13660.1_BraTUA	3.83433	0	3.77433	4.29333
A02p01470.1_BraTUA	0	0	0	0
A10p26050.1_BraTUA	0	0	0	0
A02p32870.1_BraTUA	0	0	0	0
A08p06310.1_BraTUA	0	15.056	0	0
A05p24020.1_BraTUA	11.589	0	16.1247	11.979
A06p24930.1_BraTUA	0	5.02967	0	0
A05p01020.1_BraTUA	0.894667	10.808	1.81533	3.30533
A01p16060.1_BraTUA	5.76833	2.78667	9.46	10.3303
A09p37850.1_BraTUA	3.036	0	3.191	2.015
A09p35510.1_BraTUA	0	62.4673	0	0
A09p66790.1_BraTUA	84.9447	4.831	107.388	60.632
A10p16840.1_BraTUA	5.642	16.515	5.322	6.59433
A06p06910.1_BraTUA	15.7353	4.45	14.7217	15.4913
A05p07520.1_BraTUA	0.273667	19.9233	10.5363	25.8113
A03p22710.1_BraTUA	15.2653	10.798	16.7977	21.6087
A09p01760.1_BraTUA	14.7547	0	10.359	9.167
A09p70880.1_BraTUA	0.0446667	0.038	0.043	0.0526667
A06p20880.1_BraTUA	0	21.895	0	0
A10p32110.1_BraTUA	30.334	0	31.4777	25.9783
A07p07720.1_BraTUA	0	0	0.0206667	0
A03p61230.1_BraTUA	0	7.69033	0	0
A09p28700.1_BraTUA	8.58633	431.928	9.76233	4.58333
A07p33130.1_BraTUA	296.836	3.049	295.153	362.701
A10p01030.1_BraTUA	1.648	51.023	3.83433	7.39167
A02p29540.1_BraTUA	31.6423	0.05	32.223	61.453
A10p01150.1_BraTUA	0.024	0	0.07	0.314667
A07p04200.1_BraTUA	0	12.8837	0	0
A09p18220.1_BraTUA	13.4207	3.99967	19.2717	21.426
A07p21880.1_BraTUA	3.24167	198.453	2.38233	3.15867
A05p21600.1_BraTUA	109.332	0.097	101.979	107.847
A09p28320.1_BraTUA	0.151	0.156333	0.283667	0.068
A03p19490.1_BraTUA	0.0466667	0	0	0.141333
A10p10110.1_BraTUA	0	149.266	0	0
A03p44700.1_BraTUA	37.227	201.992	48.118	78.331
A05p07980.1_BraTUA	70.6097	0	142.17	286.953
A08p00460.1_BraTUA	0	4.79533	0	0
A07p27310.1_BraTUA	6.76233	2.60167	0.967333	2.199
A08p07910.1_BraTUA	1.436	0.185333	2.44067	2.78367
A07p31890.1_BraTUA	0.478	0.297	0.364333	0.357333
A01p14980.1_BraTUA	0.0253333	0.839333	0	0.125667
A02p46690.1_BraTUA	1.51467	0	1.69	0.887667
A07p01470.1_BraTUA	0	11.6813	0.0233333	0
A10p01620.1_BraTUA	14.15	23.5007	8.59	9.66067
A04p26390.1_BraTUA	16.4293	0.158667	18.443	23.0787
A03p49830.1_BraTUA	0.044	10.0377	0.323667	0.265667
A08p31620.1_BraTUA	9.33367	0.012	12.256	12.4333
A09p55050.1_BraTUA	0	0.306333	0.0333333	0.0136667
A05p27200.1_BraTUA	0.163333	0.215333	0.117667	0.188
A02p04540.1_BraTUA	0.831333	31.4413	0.165333	0.171333
A04p01450.1_BraTUA	20.6963	23.317	22.8697	27.3487
A08p20090.1_BraTUA	32.2263	85.4883	42.0423	26.151
A03p30870.1_BraTUA	19.2727	0	19.4917	43.4327
A09p02580.1_BraTUA	0.0953333	0	0	0.0733333
A08p15480.1_BraTUA	0.190333	0	0.022	0.156667
A09p14950.1_BraTUA	0	16.3773	0	0
A09p36860.1_BraTUA	16.099	9.58567	15.5707	14.5137
A01p24970.1_BraTUA	4.79867	0	4.47333	7.04633
A10p23440.1_BraTUA	0	10.2643	0	0
A10p33380.1_BraTUA	6.186	24.221	8.317	10.272
A02p25850.1_BraTUA	16.738	0.0176667	26.2017	17.1933
A10p28600.1_BraTUA	0.425667	3.97167	0.648	1.86233
A10p11880.1_BraTUA	2.941	15.4483	4.168	5.16933
A09p20950.1_BraTUA	76.529	0.0206667	17.7583	10.821
A09p01350.1_BraTUA	0	0.333667	0.00966667	0
A10p01600.1_BraTUA	0.495333	6.247	1.27933	1.36633
A10p13100.1_BraTUA	4.482	0.392667	2.714	5.43767
A10p19310.1_BraTUA	0.865333	0	0.990667	0.651
A10p31710.1_BraTUA	0	4.77667	0	0
A09p22790.1_BraTUA	10.5083	0.0486667	13.2897	7.04
A05p40020.1_BraTUA	0.0123333	0.047	0.057	0.052
A10p35870.1_BraTUA	0	7.567	0.0233333	0.114
A07p36180.1_BraTUA	15.1563	0	9.851	4.55
A02p22300.1_BraTUA	0	0.166	0	0.0316667
A09p66800.1_BraTUA	0.366667	0.037	0.165333	0.1
A08p28150.1_BraTUA	0.034	455.084	0.0773333	0
A04p26950.1_BraTUA	902.684	2.732	1747.14	891.207
A09p01360.1_BraTUA	4.842	5.80967	2.19467	2.60567
A03p29630.1_BraTUA	3.38767	1.79933	5.53967	8.64333
A09p40880.1_BraTUA	0.0943333	0	0.445	1.41033
A04p27720.1_BraTUA	0	3.44867	0	0
A07p26710.1_BraTUA	3.079	0	2.40567	2.54333
A09p38290.1_BraTUA	0	104.514	0	0.03
A04p23080.1_BraTUA	92.9117	0.0956667	85.2107	155.998
A07p02640.1_BraTUA	0	20.862	0	0.203
A10p15380.1_BraTUA	15.4003	0	16.384	18.1147
A05p32420.1_BraTUA	0	79.1153	0	0
A03p04110.1_BraTUA	95.4243	0.0633333	144.575	135.165
A05p41660.1_BraTUA	0	3.81533	0.0883333	0
A09p01180.1_BraTUA	2.53667	0.0233333	1.25467	4.277
A04p12380.1_BraTUA	0	22.139	0	0.0273333
A02p03910.1_BraTUA	24.2657	257.899	25.8297	23.5697
A06p33230.1_BraTUA	228.46	0.238667	326.35	379.664
A09p38020.1_BraTUA	0	7.93633	0.0463333	0
A01p06950.1_BraTUA	23.248	5.45367	11.502	21.1953
A10p24760.1_BraTUA	6.83633	0	8.43	6.42567
A02p07160.1_BraTUA	0	115.314	0	0
A02p13890.1_BraTUA	121.514	34.2753	145.312	178.835
A04p24340.1_BraTUA	27.6433	70.948	25.8347	33.3783
A04p24210.1_BraTUA	45.199	0	48.9177	61.3463
A06p36720.1_BraTUA	0	22.5473	0	0
A09p64020.1_BraTUA	27.713	0	21.018	20.6403
A09p23520.1_BraTUA	0	0	0	0
A04p08510.1_BraTUA	0.0706667	0.187	0.0996667	0
A05p29800.1_BraTUA	0.077	41.425	0.179667	0.241
A06p36610.1_BraTUA	37.187	0	36.477	33.4303
A09p11280.1_BraTUA	0	0	0	0.042
A09p13100.1_BraTUA	0	0	0	0
A01p48170.1_BraTUA	0	0	0.019	0.0146667
A09p37730.1_BraTUA	0	0.890667	0	0.011
A05p04940.1_BraTUA	0.655	0.0863333	0.986333	0.624
A03p07400.1_BraTUA	0.0836667	0	0.210667	0.404333
A08p13520.1_BraTUA	0	0.0526667	0	0
A08p15890.1_BraTUA	0	17.7347	0	0
A09p26020.1_BraTUA	24.932	38.116	23.0883	20.1893
A04p11130.1_BraTUA	38.2163	2.18167	28.5523	34.2583
A01p30710.1_BraTUA	6.33333	231.377	3.09233	1.602
A04p09050.1_BraTUA	185.907	104.189	184.593	259.382
A03p05720.1_BraTUA	112.142	43.451	214.474	173.179
A09p10130.1_BraTUA	37.6797	3.608	35.8547	44.4657
A01p08790.1_BraTUA	4.336	0	4.06433	4.885
A07p10500.1_BraTUA	0	0.775333	0	0
A10p34330.1_BraTUA	0.408	29.6497	0.489333	1.261
A03p26180.1_BraTUA	30.2587	0	35.601	37.0507
A10p33610.1_BraTUA	0	14.351	0	0
A07p24410.1_BraTUA	13.6673	4.44533	14.4617	13.4503
A05p32370.1_BraTUA	1.14	15.6757	3.24	7.10067
A03p51990.1_BraTUA	12.5517	171.226	11.897	17.3947
A06p08070.1_BraTUA	72.2537	0.37	80.5547	62.862
A01p23270.1_BraTUA	0.248333	0	0.24	0.242667
A05p32450.1_BraTUA	0	2.50667	0	0
A05p39520.1_BraTUA	0.930667	3.23	1.06767	2.36433
A03p39770.1_BraTUA	6.09267	48.371	2.82567	2.607
A08p22890.1_BraTUA	33.1663	0	49.442	61.2323
A10p06560.1_BraTUA	0	0	0	0
A06p09180.1_BraTUA	0.0143333	0.0673333	0	0
A01p23540.1_BraTUA	0.147667	2.423	0.0363333	0.059
A07p41250.1_BraTUA	1.703	9.42367	0.794	1.07433
A09p27050.1_BraTUA	7.42467	0	8.28333	9.252
A07p04250.1_BraTUA	0	9.48267	0	0
A03p11650.1_BraTUA	9.33267	0	8.17133	7.94167
A03p55530.1_BraTUA	0	7.79233	0.0256667	0.0306667
A02p44850.1_BraTUA	6.42467	0.653333	9.58833	7.64567
A08p27580.1_BraTUA	0.288	0	0.638	0.527
A07p26930.1_BraTUA	0.0403333	0	0.013	0
A09p36260.1_BraTUA	0	0	0	0
A02p17650.1_BraTUA	0	0	0	0
A07p04740.1_BraTUA	0	9.34267	0	0
A03p19220.1_BraTUA	14.7847	7.785	15.0113	10.6433
A01p32700.1_BraTUA	9.22767	0.379667	7.27467	9.218
A07p42630.1_BraTUA	0.0263333	0.779333	0	0.0286667
A09p36720.1_BraTUA	0.962333	1.25167	0.398	1.01533
A07p30350.1_BraTUA	2.17433	14.2703	2.22	1.158
A03p43300.1_BraTUA	13.388	0	14.4497	12.4937
A03p18100.1_BraTUA	0	11.6503	0	0
A02p42900.1_BraTUA	12.0127	0	11.3783	12.5303
A06p09390.1_BraTUA	0	293.784	0	0
A07p36710.1_BraTUA	269.348	1.97167	260.103	281.059
A10p16690.1_BraTUA	2.68167	19.3657	1.55233	1.53567
A03p03980.1_BraTUA	15.54	12.442	22.452	23.603
A10p31590.1_BraTUA	11.471	8.88633	14.7207	14.032
A09p62370.1_BraTUA	7.711	0	9.25467	10.2803
A04p05160.1_BraTUA	0.0153333	0.659667	0	0
A05p20480.1_BraTUA	1.63833	1.08067	1.41	0.539667
A01p07650.1_BraTUA	0.33	1.13567	0.607333	0.674333
A02p07020.1_BraTUA	1.357	5.64767	1.1	0.979
A08p21870.1_BraTUA	4.90767	7.00167	5.69733	5.38533
A10p02610.1_BraTUA	10.2227	1.11767	6.61033	8.56367
A07p14740.1_BraTUA	0.925333	16.112	1.835	2.16567
A04p04330.1_BraTUA	12.7933	31.8597	14.8437	14.8957
A03p15220.1_BraTUA	35.4297	1.473	36.8587	33.0873
A01p21610.1_BraTUA	2.39333	1.48067	2.20533	1.04533
A03p57130.1_BraTUA	2.82767	2.482	2.77233	2.32067
A04p05630.1_BraTUA	0.737	0	1.795	0.0646667
A08p08750.1_BraTUA	0	0.511667	0	0.0713333
A10p17820.1_BraTUA	0.324	0	0.190667	0.257333
A02p33480.1_BraTUA	0	10.609	0	0
A06p10500.1_BraTUA	14.7447	0	10.9887	10.2983
A09p43370.1_BraTUA	0	12.953	0	0
A01p44620.1_BraTUA	13.3433	0	16.248	15.8443
A01p10050.1_BraTUA	0	292.838	0	0.107333
A08p10230.1_BraTUA	555.308	3.10867	677.91	441.705
A10p06620.1_BraTUA	4.509	4.471	5.25367	3.21167
A05p17500.1_BraTUA	5.21967	0	3.92467	4.32967
A02p18270.1_BraTUA	0	338.697	0	0
A06p18930.1_BraTUA	302.49	31.4747	308.703	367.508
A10p35630.1_BraTUA	44.127	0	36.2127	31.5453
A01p16710.1_BraTUA	0	17.6733	0	0
A08p08600.1_BraTUA	21.637	1.63267	16.0277	15.6153
A07p11470.1_BraTUA	3.738	87.4823	1.06267	0.284667
A09p03710.1_BraTUA	50.009	22.5487	45.6693	70.84
A06p07510.1_BraTUA	28.876	27.434	21.8093	16.442
A06p42730.1_BraTUA	16.4667	0.00766667	18.9943	27.1373
A09p05090.1_BraTUA	0	0.674667	0	0
A04p07490.1_BraTUA	0.830667	0.113	1.36733	1.21833
A03p33060.1_BraTUA	0.337333	26.0453	0.238333	0.0773333
A09p42300.1_BraTUA	95.358	0	27.232	12.329
A01p26430.1_BraTUA	0	1.14367	0.0286667	0
A05p30770.1_BraTUA	0.0436667	15.7273	0.145667	0.789333
A05p07540.1_BraTUA	8.83867	47.3843	9.044	12.4673
A09p00410.1_BraTUA	46.194	18.4767	41.1207	49.0343
A10p30930.1_BraTUA	16.1623	1.13767	21.4823	17.571
A02p47210.1_BraTUA	0.349333	36.162	1.132	1.091
A05p29980.1_BraTUA	44.769	18.316	53.025	37.0977
A05p22750.1_BraTUA	16.1333	7.253	11.5937	8.99433
A05p08190.1_BraTUA	3.32467	1.23567	7.66733	9.226
A08p03100.1_BraTUA	0.618	0.281	1.192	0.685
A05p09630.1_BraTUA	0.266667	1.572	0.597333	0.518333
A03p27040.1_BraTUA	2.189	7.201	1.121	0.614333
A02p44500.1_BraTUA	5.19367	21.0237	4.195	5.662
A03p38700.1_BraTUA	23.0063	0.269	22.5987	20.0897
A09p12510.1_BraTUA	0.176333	0.552	0.201333	0.227667
A05p09510.1_BraTUA	0.677	0.828	0.339667	0.347
A09p14320.1_BraTUA	1.073	1.48533	0.636	0.448667
A01p22720.1_BraTUA	1.289	0.135667	1.01667	3.51267
A02p18280.1_BraTUA	0.036	0	0.114333	0.173333
A06p21540.1_BraTUA	0	75.1607	0	0.00833333
A09p24390.1_BraTUA	74.9993	10.6097	69.4567	54.536
A02p34810.1_BraTUA	9.021	0.631	10.985	8.933
A01p01310.1_BraTUA	0.908667	0	0.884	0.789667
A07p06000.1_BraTUA	0.0216667	0.056	0	0.051
A04p22130.1_BraTUA	0.0366667	15.948	0.017	0
A01p43380.1_BraTUA	15.354	0.905333	15.5033	15.0547
A09p27450.1_BraTUA	1.24767	3.515	0.576667	0.305333
A03p42180.1_BraTUA	4.57933	4.57033	3.53733	3.069
A09p36360.1_BraTUA	15.0687	0	6.036	3.16467
A07p08370.1_BraTUA	0	140.979	0	0
A01p22410.1_BraTUA	106.419	0	175.087	188.025
A02p35060.1_BraTUA	0	13.4617	0	0
A10p22400.1_BraTUA	11.6373	0.016	7.41667	13.8297
A02p17670.1_BraTUA	0	0	0.0156667	0
A05p22480.1_BraTUA	0.130333	2.601	0.0526667	0.285
A03p47030.1_BraTUA	3.28667	32.209	2.81167	2.29033
A03p30530.1_BraTUA	16.3967	1.23867	17.7463	35.9403
A08p16330.1_BraTUA	0.784333	4.939	1.476	1.58133
A10p00380.1_BraTUA	5.88933	0	6.47667	5.57133
A05p38710.1_BraTUA	0	0.324333	0	0
A02p04280.1_BraTUA	0.221667	44.41	0.331333	0.383333
A06p07530.1_BraTUA	103.847	0.0236667	52.445	33.4863
A02p36180.1_BraTUA	0.0206667	3.26833	0.0696667	0.051
A03p21780.1_BraTUA	1.94633	0	2.363	2.259
A06p12400.1_BraTUA	0	17.4963	0	0
A01p16750.1_BraTUA	10.9773	0	7.86967	11.7263
A04p30930.1_BraTUA	0.0166667	1.237	0.0176667	0
A10p00940.1_BraTUA	0.462667	316.764	1.02267	0.905
A09p66550.1_BraTUA	193.162	0	259.669	288.395
A06p37930.1_BraTUA	0	0.109667	0.101	0
A09p44500.1_BraTUA	0.140667	0	0.038	0.0396667
A07p38230.1_BraTUA	0.02	0.79	0	0
A07p07940.1_BraTUA	0.542	2.98933	1.619	1.456
A05p24310.1_BraTUA	1.60967	0.423333	2.51467	3.902
A09p54080.1_BraTUA	0.462333	49.4383	0.111	0.330333
A05p24850.1_BraTUA	43.7583	0	58.581	57.9913
A09p17270.1_BraTUA	0	0	0	0
A06p11180.1_BraTUA	0	0	0	0
A02p14550.1_BraTUA	0	12.4113	0	0
A09p13170.1_BraTUA	14.8453	0.113	21.6743	26.532
A06p09090.1_BraTUA	0.0426667	8.131	0.0946667	0.113333
A03p22020.1_BraTUA	7.08267	70.476	6.09867	5.55867
A03p45660.1_BraTUA	77.944	110.451	65.7217	96.4527
A02p35650.1_BraTUA	127.203	0	99.3777	84.036
A03p62080.1_BraTUA	0	40.9093	0	0
A08p09620.1_BraTUA	17.1143	387.251	30.3443	44.912
A06p34970.1_BraTUA	273.792	2.25433	330.681	357.628
A05p06390.1_BraTUA	1.524	8.20567	2.533	2.06967
A09p52370.1_BraTUA	6.993	0.0853333	8.633	10.2933
A03p14750.1_BraTUA	0.349	13.7167	0.0516667	0.0296667
A09p37210.1_BraTUA	6.90967	0.035	15.0663	14.3287
A09p16410.1_BraTUA	0.031	0	0.016	0.009
A05p01500.1_BraTUA	0.0206667	3.45767	0	0
A04p07460.1_BraTUA	3.80367	10.008	2.59333	3.14633
A08p35790.1_BraTUA	10.6233	15.2303	10.889	8.732
A07p07930.1_BraTUA	16.4067	0.237333	14.0467	15.3313
A08p16090.1_BraTUA	0.183333	5.31333	0.542333	0.0553333
A08p00910.1_BraTUA	9.728	9.081	3.583	2.52533
A03p45940.1_BraTUA	10.3313	0.696	8.379	5.69267
A09p09530.1_BraTUA	0.452667	10.781	0.435333	0.458
A09p40240.1_BraTUA	10.3897	5.918	7.86867	6.46733
A09p19630.1_BraTUA	5.88067	9.67567	5.59633	5.99167
A09p69050.1_BraTUA	8.60767	0	9.648	7.827
A09p39850.1_BraTUA	0.0203333	4.40133	0	0.0473333
A09p15690.1_BraTUA	4.53267	7.44467	4.91933	4.70567
A05p06120.1_BraTUA	6.11567	18.2047	5.54167	9.65033
A06p12130.1_BraTUA	16.0483	101.719	17.5083	19.4037
A09p14430.1_BraTUA	154.162	14.6973	255.41	178.365
A03p40020.1_BraTUA	16.8827	4.42333	14.0307	13.008
A04p01300.1_BraTUA	15.2277	3.295	24.0303	8.483
A05p11810.1_BraTUA	5.81733	0	5.20867	3.64333
A08p00730.1_BraTUA	0	237.064	0	0
A03p41380.1_BraTUA	69.6993	4.84433	30.8983	125.073
A02p27390.1_BraTUA	4.765	9.55667	4.16267	4.53
A05p24680.1_BraTUA	13.8613	0.203333	12.935	9.175
A06p36030.1_BraTUA	0.362333	0	0.446667	0.438
A05p13130.1_BraTUA	0	77.8217	0	0
A02p05090.1_BraTUA	64.324	12.331	57.018	73.1807
A07p29140.1_BraTUA	7.124	0	12.609	13.651
A02p43550.1_BraTUA	0	0	0	0
A03p24170.1_BraTUA	0	27.956	0	0
A05p07390.1_BraTUA	20.344	6.402	19.4193	27.7303
A05p28420.1_BraTUA	7.36667	12.7623	10.9457	6.09967
A10p15050.1_BraTUA	13.193	0	11.565	13.8963
A04p31010.1_BraTUA	0.0206667	0.828333	0.0206667	0.012
A10p34340.1_BraTUA	0.288667	0	0.467667	0.573667
A09p64530.1_BraTUA	0.052	2.405	0.0533333	0
A01p29640.1_BraTUA	2.44067	13.6477	2.98733	3.24567
A04p18470.1_BraTUA	10.848	51.749	8.843	12.4313
A08p13880.1_BraTUA	50.6567	4.658	49.179	53.196
A02p13790.1_BraTUA	5.69533	29.1577	7.57567	6.777
A04p23860.1_BraTUA	29.7487	11.7583	31.3657	28.789
A03p43670.1_BraTUA	39.092	0	14.2417	6.26433
A08p09910.1_BraTUA	0	53.458	0	0
A08p31440.1_BraTUA	46.9017	0	37.8583	49.3157
A02p19490.1_BraTUA	0	2.406	0	0
A07p01580.1_BraTUA	2.658	0	2.94633	3.26167
A01p21540.1_BraTUA	0.0583333	46.5423	0	0.0623333
A05p04110.1_BraTUA	59.9233	0.383333	60.096	45.569
A07p08850.1_BraTUA	0.401667	0	0.522667	0.442
A03p36050.1_BraTUA	0	3.54367	0	0.0236667
A01p40830.1_BraTUA	3.362	27.5167	4.32167	4.15867
A08p12810.1_BraTUA	34.2667	82.5657	28.106	25.7123
A07p26260.1_BraTUA	53.5927	0	57.413	76.8747
A07p43010.1_BraTUA	0	0	0	0
A08p35850.1_BraTUA	0.0216667	154.259	0	0.0386667
A09p19120.1_BraTUA	350.832	2.86867	81.806	81.8417
A05p24470.1_BraTUA	3.519	0.207	2.68133	2.717
A01p08490.1_BraTUA	0.528333	90.7847	0.426667	0.140333
A06p30080.1_BraTUA	21.0573	10.6493	27.6613	86.535
A02p28520.1_BraTUA	12.8867	5.554	11.4037	10.2777
A02p18730.1_BraTUA	7.234	0.396667	4.93933	6.35833
A02p28290.1_BraTUA	0.299333	0	0.260333	0.235667
A10p25660.1_BraTUA	0	0.0316667	0	0.0846667
A05p12020.1_BraTUA	0.0153333	0.0903333	0.0323333	0.0523333
A02p31660.1_BraTUA	0.179	4.88333	0.0473333	0.299667
A01p37480.1_BraTUA	6.60533	36.784	5.46833	4.96933
A07p14970.1_BraTUA	37.156	11.797	37.0663	36.2137
A10p29920.1_BraTUA	10.0177	0.675	9.272	8.83167
A01p11590.1_BraTUA	0.262	6.59133	0.352333	0.189333
A10p28760.1_BraTUA	6.37633	0	3.94767	3.32767
A03p62350.1_BraTUA	0	0	0	0
A09p00150.1_BraTUA	0	33.2203	0	0
A06p12210.1_BraTUA	22.522	0	24.9953	34.881
A02p47160.1_BraTUA	0	79.723	0	0
A10p23890.1_BraTUA	54.551	16.847	81.769	94.066
A09p23820.1_BraTUA	19.2373	0	19.067	19.1103
A09p31710.1_BraTUA	0	0.0173333	0	0
A08p15180.1_BraTUA	0.026	4.42067	0.044	0
A04p21590.1_BraTUA	5.75333	1.52767	5.24733	3.51567
A03p27610.1_BraTUA	2.26333	23.2967	2.58067	2.18233
A08p26020.1_BraTUA	27.6783	116.36	27.553	27.7367
A02p03730.1_BraTUA	140.62	0.0676667	172.864	260.453
A06p31070.1_BraTUA	0.796667	0	0	0
A09p20440.1_BraTUA	0	0.190333	0	0.018
A05p10380.1_BraTUA	0.0863333	0.103	0	0.300667
A03p32970.1_BraTUA	0.06	21.652	0.133667	0.248667
A07p42120.1_BraTUA	19.9227	0	15.4843	14.553
A08p30320.1_BraTUA	0	0	0	0
A07p16270.1_BraTUA	0	0	0	0
A03p59610.1_BraTUA	0	13.3037	0	0
A07p34800.1_BraTUA	12.3673	4.8	13.5707	11.756
A03p22100.1_BraTUA	3.246	0.420333	2.128	4.156
A04p11560.1_BraTUA	0.652	5.33967	0.797	0.594333
A07p34320.1_BraTUA	5.45767	5.15433	5.805	5.07467
A06p04990.1_BraTUA	7.32067	15.0413	6.65233	5.13833
A01p46980.1_BraTUA	15.2237	0.092	14.1753	13.884
A01p29590.1_BraTUA	0.041	0	0.093	0.146667
A02p39980.1_BraTUA	0.054	0	0.126	0.0446667
A09p23540.1_BraTUA	0	0	0	0
A08p17250.1_BraTUA	0	34.8297	0	0
A07p34610.1_BraTUA	33.633	3.123	44.1573	37.5543
A04p19710.1_BraTUA	6.392	31.6677	3.54833	2.6
A01p08410.1_BraTUA	24.1177	39.5117	23.113	33.1707
A09p01310.1_BraTUA	13.5297	2.785	19.4573	42.6427
A10p11350.1_BraTUA	2.80833	35.1863	2.56933	3.16633
A05p35300.1_BraTUA	29.113	6.11033	48.9157	97.8797
A05p01410.1_BraTUA	6.89	0	6.535	6.722
A07p09580.1_BraTUA	0	17.9617	0	0
A05p11360.1_BraTUA	19.8037	0	15.5763	17.643
A01p45710.1_BraTUA	0	15.6053	0	0
A03p09080.1_BraTUA	13.2447	0	16.5663	18.3303
A09p69530.1_BraTUA	0	0.01	0	0
A05p24660.1_BraTUA	0.0856667	2.206	0.0393333	0.0703333
A06p14210.1_BraTUA	4.061	0.0696667	2.14067	2.40133
A03p08810.1_BraTUA	0.0486667	81.2333	0.009	0.0213333
A05p15490.1_BraTUA	93.0597	0.175	99.574	84.073
A09p12960.1_BraTUA	0	0.147667	0.04	0
A07p27440.1_BraTUA	0.180667	0.760667	0	0.103667
A02p36300.1_BraTUA	1.02767	0.0576667	0.809	0.605667
A05p14900.1_BraTUA	0.072	0.622667	0.018	0.06
A04p16480.1_BraTUA	0.256333	0.284333	0.180333	0.195
A03p27420.1_BraTUA	0.0983333	0	0.263333	0.152667
A04p17930.1_BraTUA	0	0.897	0	0.0283333
A06p44230.1_BraTUA	1.02733	10.105	0.986333	0.693
A10p32280.1_BraTUA	9.67633	25.169	9.65	9.13367
A01p06340.1_BraTUA	87.7533	0	50.2067	22.6903
A02p01160.1_BraTUA	0	0.02	0	0
A08p28710.1_BraTUA	0	17.167	0	0
A05p30190.1_BraTUA	15.753	6.973	26.3347	18.9777
A05p34650.1_BraTUA	6.305	0	6.24	6.74233
A07p06400.1_BraTUA	0	6.728	0	0
A07p06790.1_BraTUA	8.76133	0.045	9.12233	5.30667
A02p00390.1_BraTUA	0.0796667	0	0.054	0
A04p23810.1_BraTUA	0	2.895	0	0
A06p05580.1_BraTUA	3.03767	2.866	2.694	2.41167
A07p43950.1_BraTUA	2.257	3.459	4.99567	4.70333
A07p17260.1_BraTUA	4.40933	0	4.96567	2.426
A01p27990.1_BraTUA	0	0.0643333	0	0
A05p00010.1_BraTUA	0.243	0	0.0996667	0.035
A09p47490.1_BraTUA	0	0.564	0	0
A09p35370.1_BraTUA	0.995667	19.579	0.259333	0.798667
A09p08090.1_BraTUA	10.2747	0.665	21.1227	23.1057
A07p21990.1_BraTUA	1.05	9.06933	0.809667	0.922333
A01p03190.1_BraTUA	9.013	0.247667	11.068	13.3397
A03p05340.1_BraTUA	0.369667	3.677	0.167	0.379
A01p47110.1_BraTUA	2.652	23.2213	4.078	6.409
A05p04130.1_BraTUA	19.161	0	21.719	24.9403
A03p10860.1_BraTUA	0	76.44	0	0
A04p18440.1_BraTUA	51.562	31.8067	43.894	92.915
A06p17450.1_BraTUA	8.07233	90.3547	15.4877	50.0773
A02p21540.1_BraTUA	81.107	106.73	117.188	113.194
A05p30810.1_BraTUA	10.936	0.0783333	133.508	443.93
A01p46770.1_BraTUA	0.0573333	31.007	0.113333	0
A03p25370.1_BraTUA	34.614	0	42.3037	35.9567
A03p59950.1_BraTUA	0	0.126667	0	0
A03p55920.1_BraTUA	0.0793333	0	0	0.0433333
A01p00880.1_BraTUA	0	4.61833	0	0
A04p09650.1_BraTUA	8.16533	0	5.84667	3.13833
A02p33210.1_BraTUA	0	0	0	0
A03p63800.1_BraTUA	0	2.099	0	0
A03p06890.1_BraTUA	2.85033	0.235667	2.717	1.00467
A04p19380.1_BraTUA	0.152667	2.17267	0.186	0.204333
A09p22400.1_BraTUA	4.32	0	1.23633	0.876
A02p45960.1_BraTUA	0.015	0.0683333	0	0.017
A01p40130.1_BraTUA	0.0616667	9.333	0.021	0.0233333
A05p27760.1_BraTUA	23.107	37.7413	12.8953	4.952
A01p06700.1_BraTUA	43.6757	0	64.863	70.1083
A08p04720.1_BraTUA	0	19.416	0	0
A10p30180.1_BraTUA	5.15033	10.721	14.8663	24.5963
A01p04160.1_BraTUA	5.52	7.42833	6.28467	10.3403
A02p38270.1_BraTUA	5.324	0.052	5.41767	6.39667
A03p45780.1_BraTUA	0.103333	4.13467	0.150667	0.585333
A05p32000.1_BraTUA	5.348	8.80567	4.084	5.107
A09p60190.1_BraTUA	8.44833	19.5297	4.60933	5.32533
A10p27660.1_BraTUA	24.396	49.4183	15.4747	17.775
A07p29680.1_BraTUA	62.351	0.164667	50.344	59.9347
A10p03840.1_BraTUA	0.233667	11.6667	0.367	0.134667
A02p40160.1_BraTUA	12.2343	43.936	15.8387	13.0087
A09p23410.1_BraTUA	11.3743	0	17.8947	43.1477
A03p29500.1_BraTUA	0	0	0	0
A06p13350.1_BraTUA	0.103333	0	0.089	0.0516667
A09p17900.1_BraTUA	0.0326667	0	0	0
A03p36060.1_BraTUA	0	0.0316667	0	0
A08p01920.1_BraTUA	0.0156667	7.874	0.031	0.0346667
A03p05250.1_BraTUA	7.332	0	6.91267	5.98867
A10p10650.1_BraTUA	0	14.7523	0	0
A03p08370.1_BraTUA	12.0503	2.57067	13.778	13.3297
A03p19550.1_BraTUA	5.64733	0	2.855	1.942
A03p53950.1_BraTUA	0	0.0133333	0.105333	0.02
A10p19960.1_BraTUA	0	11.269	0	0
A10p26030.1_BraTUA	16.6247	0.689	13.708	11.864
A05p31980.1_BraTUA	0.103	120.095	0.267667	0.471667
A09p47760.1_BraTUA	126.874	145.132	135.12	112.97
A06p28380.1_BraTUA	262.914	0.024	259.055	152.323
A10p08560.1_BraTUA	0.046	0.923	0.0563333	0
A06p12860.1_BraTUA	0.909667	8.8	0.669	0.679
A08p00860.1_BraTUA	11.2107	1.873	6.887	7.15533
A01p22700.1_BraTUA	1.37267	0	2.432	2.16167
A01p33100.1_BraTUA	0	308.854	0	0
A08p16730.1_BraTUA	213.978	0.752	449.076	480.43
A08p17490.1_BraTUA	1.082	0	0.316667	0.408333
A01p01890.1_BraTUA	0	22.9807	0	0
A02p24090.1_BraTUA	19.7997	0	18.4663	26.398
A09p18160.1_BraTUA	0	41.168	0	0
A04p30440.1_BraTUA	42.754	0.160333	48.1713	40.0573
A07p22890.1_BraTUA	0.512667	18.6937	0.510333	0.0716667
A05p13550.1_BraTUA	18.5797	0	17.081	16.979
A04p10910.1_BraTUA	0	28.1083	0	0
A07p38000.1_BraTUA	28.6117	0.0123333	31.7267	32.774
A02p12070.1_BraTUA	0	2.26933	0	0
A06p15040.1_BraTUA	3.845	0	3.53267	2.456
A02p24450.1_BraTUA	0	1.00033	0.037	0.039
A09p16530.1_BraTUA	1.374	5.92033	0.896667	0.875
A06p20740.1_BraTUA	7.02533	0.223333	3.94033	4.60333
A01p18520.1_BraTUA	0.109333	0.297333	0	0
A07p08870.1_BraTUA	0.281	0.321667	0.383	0.156
A05p38990.1_BraTUA	0.265333	13.5167	0.099	0.437
A08p24140.1_BraTUA	16.8543	1.03867	16.945	12.3057
A04p23790.1_BraTUA	1.543	0	0.979667	0.758667
A08p24440.1_BraTUA	0	0	0	0
A06p09140.1_BraTUA	0	0.826333	0	0
A03p39430.1_BraTUA	1.13767	6.09	1.20133	0.746
A02p21060.1_BraTUA	5.157	0	6.28533	8.648
A05p29020.1_BraTUA	0	0	0	0
A02p00510.1_BraTUA	0	0	0	0
A01p35180.1_BraTUA	0	1.903	0	0
A07p43960.1_BraTUA	2.24667	4.22033	2.39	2.5
A05p24210.1_BraTUA	7.119	0.190667	5.80933	3.15833
A09p64780.1_BraTUA	0.390667	0	0.181333	0.160333
A04p22790.1_BraTUA	0.023	50.8507	0	0
A08p16070.1_BraTUA	34.4113	6.95	34.641	42.5627
A10p35240.1_BraTUA	8.68	1.09533	6.377	4.91533
A06p23150.1_BraTUA	0.963333	0.132667	0.498	0.793333
A05p29930.1_BraTUA	0.138333	0	0.192667	0.0846667
A09p31740.1_BraTUA	0	16.953	0	0
A03p05990.1_BraTUA	2.74133	0	3.10833	12.0053
A04p08120.1_BraTUA	0	0	0	0.0116667
A02p13740.1_BraTUA	0	41.4843	0	0
A07p44280.1_BraTUA	21.4807	0.177333	22.5123	24.765
A03p64460.1_BraTUA	0.144333	0.0516667	0.169	0.171
A01p27880.1_BraTUA	0.0483333	18.5643	0.117333	0.0933333
A08p35600.1_BraTUA	15.9243	0	20.848	17.933
A08p25360.1_BraTUA	0	4.492	0	0
A05p39740.1_BraTUA	4.90233	16.725	3.22167	2.706
A07p33510.1_BraTUA	6.37867	0	5.672	13.277
A09p49910.1_BraTUA	0	0	0	0
A01p43560.1_BraTUA	0	0	0	0
A06p39720.1_BraTUA	0	0	0.0156667	0.0293333
A02p18360.1_BraTUA	0	14.4017	0	0
A09p08850.1_BraTUA	9.844	0.0316667	11.3193	12.7543
A05p02770.1_BraTUA	0	0	0.0553333	0.0166667
A09p34990.1_BraTUA	0.011	1.80933	0	0
A03p41830.1_BraTUA	11.0097	0.318	4.176	0.794667
A10p24060.1_BraTUA	0.515333	4.672	0.72	0.776333
A09p62980.1_BraTUA	4.525	18.9213	3.31233	3.16567
A04p18890.1_BraTUA	10.9533	0	3.59567	4.99667
A09p30910.1_BraTUA	0	0	0	0
A10p08190.1_BraTUA	0	10.9967	0	0
A09p08670.1_BraTUA	9.38033	24.194	9.329	9.088
A08p35250.1_BraTUA	28.6597	0	23.028	27.0787
A07p40050.1_BraTUA	0	0.026	0	0
A01p34220.1_BraTUA	0.0513333	0.085	0.008	0.02
A03p38580.1_BraTUA	0.0926667	20.9427	0.0423333	0.109
A05p36860.1_BraTUA	20.4243	21.0363	25.5917	23.798
A03p38950.1_BraTUA	16.0057	0.028	23.1267	23.274
A10p00150.1_BraTUA	0.039	1.80767	0	0
A09p68010.1_BraTUA	2.39967	0	2.149	1.68767
A07p42980.1_BraTUA	0	7.92733	0.047	0
A01p03260.1_BraTUA	5.84333	0	6.632	5.49233
A02p34360.1_BraTUA	0	144.876	0	0
A03p46750.1_BraTUA	65.5373	0.0373333	115.286	200.893
A04p13680.1_BraTUA	0.0343333	117.446	0	0
A06p37760.1_BraTUA	111.234	0	90.2513	136.864
A10p28100.1_BraTUA	0	14.1337	0	0
A02p47710.1_BraTUA	17.6353	2.078	19.4057	17.1127
A05p08970.1_BraTUA	3.48167	0.115	3.76567	2.09933
A03p07940.1_BraTUA	0.0653333	0	0.108333	0.0263333
A08p16750.1_BraTUA	0	25.0213	0	0
A06p24810.1_BraTUA	23.2093	0.247	36.7367	49.2847
A01p44040.1_BraTUA	0.244667	0	0.448	0.343
A04p11110.1_BraTUA	0	7.43767	0	0
A08p21320.1_BraTUA	15.334	0.130667	6.73433	10.224
A05p25180.1_BraTUA	0.0143333	176.758	0	0
A09p25440.1_BraTUA	276.027	0	374.717	302.481
A01p21410.1_BraTUA	0	5.49767	0	0
A07p43860.1_BraTUA	6.71133	20.4387	6.49533	4.61667
A09p17750.1_BraTUA	20.2133	40.8983	16.2527	20.5703
A04p11730.1_BraTUA	44.735	0.128333	31.6167	51.9033
A03p55180.1_BraTUA	0.061	0.283667	0.0323333	0.145333
A05p16440.1_BraTUA	1.66267	23.3667	0.0876667	0.132667
A08p07580.1_BraTUA	24.107	18.0627	35.7083	30.8477
A09p71510.1_BraTUA	18.0127	0.496667	18.157	18.4433
A06p45370.1_BraTUA	0.155333	4.17033	0.0373333	0.03
A05p32980.1_BraTUA	2.81967	0	3.87	4.62333
A08p09640.1_BraTUA	0	2.76	0	0
A03p15650.1_BraTUA	2.46667	0	1.97867	2.56967
A07p02810.1_BraTUA	0.0466667	0	0.0493333	0.113667
A04p17410.1_BraTUA	0	0	0	0
A03p62460.1_BraTUA	0	7.455	0	0
A10p29000.1_BraTUA	6.23533	0.199333	6.27233	6.966
A06p04080.1_BraTUA	0	3.406	0.032	0
A07p00540.1_BraTUA	2.28067	6.33767	2.93667	5.70233
A10p16410.1_BraTUA	4.51033	0	4.53333	5.45267
A09p31950.1_BraTUA	0	21.9783	0	0
A03p54260.1_BraTUA	20.1667	1.18967	22.0733	21.9573
A07p43970.1_BraTUA	3.74	0.144667	2.193	1.52567
A06p24510.1_BraTUA	0	12.5877	0	0
A01p08990.1_BraTUA	6.969	0.571667	7.38767	8.63133
A03p09760.1_BraTUA	0.157667	0.704333	0.794333	0.891667
A05p26360.1_BraTUA	0.0766667	0.552667	0	0.154
A03p07220.1_BraTUA	0.217	0.320667	0.387333	0.41
A09p54070.1_BraTUA	0.186667	0	0.257	0.175333
A05p40050.1_BraTUA	0	0	0	0
[truncated: 44,166 more rows]
