# Supplementary material for: Genome-wide identification and expression pattern analysis of lipoxygenase gene family in turnip (Brassica rapa L. subsp. rapa)
Source: PeerJ. 2022 Jul 22;10:e13746. doi: 10.7717/peerj.13746 (PMC9310782; doi:10.7717/peerj.13746)
Supplement: Supplemental Information 3 [file peerj-10-13746-s003.xlsx]

## Sheet: Sheet1
Table S2. RT-PCR primers of BrrLOXs
Gene	sequence(5'to3')
β-Actin_F	CATGTTCGAGACGTTCAATG
β-Actin_R	GAACATGTAACCTCTCTCGG
BrrLOX1_F	CTTACGCTGTGGATGGGCTT
BrrLOX1_R	ACCTTCCTCACGCACCTCCT
BrrLOX2_F	CCACGGCGATATACAACACGAG
BrrLOX2_R	GCAGAGGCGATCCAGATGATG
BrrLOX3_F	GATGAAAGACTTGCCCGTCCT
BrrLOX3_R	GCGTTTCTCTGAGGAGGCA
BrrLOX4_F	CACCGTTTGAGAGCAGAGGAAAG
BrrLOX4_R	GGGACGAGGTTGTGAAAGAGAG
BrrLOX5_F	TTCGCACGCCAAGCCATAG
BrrLOX5_R	TGGTCTTCGGTGAGAGCAGAG
BrrLOX6_F	TCCGAGAGTAGGCTGGC
BrrLOX6_R	ACGAGCACTTGAGTCACCG
BrrLOX7_F	GGCATCACAGTCAAATAGTGAACC
BrrLOX7_R	CGAGACCTCTCGACCAACG
BrrLOX8_F	CAGGCCGAAGAAGGGACG
BrrLOX8_R	GTTGTCAGTCTCGGCGGA
BrrLOX9_F	CGCAAATACCCCTCCATTGAG
BrrLOX9_R	CCTTGCCCGTGAATGTAGC
BrrLOX10_F	ATGACTTGATTGGCGTGGTGACTAC
BrrLOX10R	TTCCTTGATGTGGTTGGTCGGTTAG
BrrLOX11F	CTTATACGGCGTCGGCTTAGTGAG
BrrLOX11R	TCTGGAGAGAGGAACTCGGTGTT
BrrLOX12F	GTCGCAAATACCCCTCCATTG
BrrLOX12R	CAGTACCCTTGACTGTGGACC
BrrLOX13_F	GAGCGAGCTGGTGAATTCG
BrrLOX13_R	CCAATGCTTTACGAGTCTCAGC
BrrLOX14_F	GCATGGCTACGAGATGACGAGTT
BrrLOX14_R	GGAAGTGAGAGCGGAGTGTTGT
BrrLOX15_F	CGGAGATCGGACGGATAGAGAAG
BrrLOX15_R	GCTCGGAACTCGGAACCAAC
