# Supplementary material for: Genome-wide identification and expression pattern analysis of lipoxygenase gene family in turnip (Brassica rapa L. subsp. rapa)
Source: PeerJ. 2022 Jul 22;10:e13746. doi: 10.7717/peerj.13746 (PMC9310782; doi:10.7717/peerj.13746)
Supplement: Supplemental Information 4 [file peerj-10-13746-s004.xlsx]

## Sheet: Sheet1
Table S3. CDS sequences of predicted candidate genes for BrrLOXs
Name	Nucleic acid sequence
BrrLOX1	ATGATCGGAGACTTGGTGGATCTGTTGACCGGCGGTGGAGGAAATGCAGCGAAGGTGAAAGGAACAGTGGTTCTGATGAAGAAGAACGTTCTTGATTTCAATGATTTCAACGCTTCGTTTCTCGACCGTCTCCACGAATTTCTGGGAAACAAAGTCACTCTTCGACTTATCAGCTCCGATGTTACTGATCCAGAAAATGGTTCTAACGGTAAACTAGGAAAGGCTGCACACTTAGAGGACTGGATCACCACGATCACGTCGTTAACCGCGGGTGAATCAGCCTTCAAGGTCACATTCGATTACGACCAAGATTTTGGTTACCCTGGAGCATTCTTGATCAGAAACAGCCATTTTAGTGAGTTTTATCTCAAAAGTTTGACCCTTGAAGATGTCCCAGGG…
BrrLOX2	ATGGCTTCTCTTCTCGATCGAATCCATGAGCTTCTTGGTCGTCGTGTTTCTCTCCACCTCATCAGTTCTCTCCAACCCGACCCGGCCAATGAGAAGAGAGGAAGACTTGGAAAAGCAGCACATCTGGAAAAATGGGTGACAAAGATAAAAACGTCAGTAACCGCAGAGGAAACCGCGTTTGGAGTGACGTTTGATTGGGACGAGTCAATGGGACCACCGGCTGCGTTTGTGATCAAGAACCATCACCGTAGCCAATTCTACCTTAAGTCCCTCACTCTTCGCAACTTCCCCGGGGGTGAAGGCGGTGCCATACACTTCGTTTGCAATTCTTGGATCTATCCAAGCCATAGATACCGCTCCGACCGCGTTTTCTTCTCCAACCAGGCTTATCTTCCAAGC…
BrrLOX3	ATGTTTTGTAAAGAGTCGCCGAGTCTCCAGACCTTGAGCACAGCACAGAGCCTCAGCTCTCTGTTCCCTAAACCATCAGCACTCATCAACCCCATTTTGACAGGCCGTCGAGACAAGCCGTGTCGTCGTCAAAACTTCCGTGGACGATGTAAGATCACAGCCTCACAGTCCAATATTGCACAGAAAGGTAAATTACTGAAAGAGAAAGTTAAGAGAATCAAAGTTAAGGGATTCATAACTGCTGAAGAAGGGCTGCTGGAGAGCTTAAGTTGGTTGAGACCTCTCGATGTCATTACGGATATCCGCGGCAGATCACTGCTCGTCGAGCTTATTAGCGCCGAGACTGACACCCGGACGGTTATGGAGGAGGGTCCAGTAGAAGACTATGCACAACGTGTA…
BrrLOX4	ATGTTTGTAGCATCTCCGGTGAAAACAAACTCCTACGGTGCCGGCCTGGTGAGATTTCCGGCGTTTCCCGTACTTCCACGGCGGCGACAACACATAGTTCCACTTTCCAGAAAAGTCCGAGCTGTGATAAGCCGGGAAGAAAAGACGGTGGATCAAGAAGATGGAAAAAATACAAACGGTTCACTAGTAAGTAACACACCCGCGTTTCCATGGCAGAGATCTAAGTATACGGGAACAAAAACGGTCATTGCGGTTGTGAAGATCAGGAAGAAGATGAGAGAGAAGCTAACTGAGAGGGTTGAGCATCAACTAGAGCTTTTAATGAAAGCCATAGGTCAAGGGATGTTGATTCAGCTTGTTAGTGAAGAAATCGATCCTGAAACTGGTTCAGGTCGAAAG…
BrrLOX5	ATGGCTCTAGCTAAAGAGATAATGGGTTCTCGTCTCATCTTTGAGAGATCATCATCACTAGCTTCCTCTCCGTTTCAGTCTCGTCTCTCCATCAAGAAGAAGACACAGAGAACGCAATTATCTATCAATCCTTTTGACTTGAGCCCGATGAAAGCTGCTATCTCCGGCGGTGTCGTGGCGGCAATCAGCGAAGATTTGGTTAAAACGCTGCGTTTTAAAACACTTGGTAGAAACCAAGAAAATGAGGAGGTGGAGAAGGCGGTTCAATTTAAGGTGAGAGCAGTTGTAACGGTGAGGAACAAGAACAAAGAAGACTTTAAAGAGACTTTGGTTAAGCATTTAGATGCTTTTACCGACAAAATCGGTAGAAACGTTGTCTTGGAGCTTATCAGCATTCAA…
BrrLOX6	ATGGCTTCTTTTCTCGATCGAGTCCATGAGCTTCTTGGTCGTCGCGTATCTCTCCACCTCGTCAGCTCTCTCCAACCCGACCCTGCCAATGAGAAGAGAGGAAGACTTGGAAAAGCAGCACATCTGGAAAAATGGGTGACAAAAATAAAAACGTCTGTAACCGCGGAGGAAACCGCGTTTGCGGTGACATTTGATTGGGACGAGTCAATGGGACCACCGGCTGCGTTTGTCATCAAGAACCACCACCATAGCCAATTCTACCTTAAGTCCCTCACTCTCCGCAACTTCCCTGGCGGTGAAGGCGGTCCGATACACTTCGTTTGCAATTCTTGGATCTATCCAAGCCATCGGTACCGCTCTGACCGCGTTTTCTTCTCTAACAAGGCATATCTTCCAAAT…
BrrLOX7	ATGTTTTGTAAAGAGTCGTCGTCGGGTCTCCAGACCCTGAGCATAGCAAAGAGCCTCAGCTCTCCGTTCCATAAACCATCACCACTCATCAACCCCATTTGGACAGGACGTCGAGACAAGCTGTGTCGTCCCCGAAACCTCGGTGGACGATGTAAGGTCACGGCATCACAGTCAAATAGTGAACCGAAAGGTAACATAATGAAAGAAAAAGTTAAAAAAATCAAAGTAAAGGGATATATACAGGCCGAAGAAGGGACGGTGCTGGAGGGCCTACGTTGGTCGAGAGGTCTCGATGACATTTCAGATATTGCCGGCAGATCACTGCTCGTTGAGCTTATTTCCGCCGAGACTGACAACCGGACGCTGATGGAGAAGGATCCGGTAGAAGACTATGCACAA…
BrrLOX8	ATGTTTTGTAAAGAGTCGTCGTCGGGTCTCCAGACCCTGAGCATAGCAAAGAGCCTCAGCTCTCCGTTCCATAAACCATCACCACTCATCAACCCCATTTGGACAGGACGTCGAGACAAGCTGTGTCGTCCCCGAAACCTCGGTGGACGATGTAAGGTCACGGCATCACAGTCAAATAGTGAACCGAAAGGTAACATAATGAAAGAAAAAGTTAAAAAAATCAAAGTAAAGGGATATATACAGGCCGAAGAAGGGACGGTGCTGGAGGGCCTACGTTGGTCGAGAGGTCTCGATGACATTTCAGATATTGCCGGCAGATCACTGCTCGTTGAGCTTATTTCCGCCGAGACTGACAACCGGACGCTGATGGAGAAGGATCCGGTAGAAGACTATGCACAA…
BrrLOX9	ATGTTTTGTAAAGAGGCGTCGTCCGGTCTCCAGACCTTAAACATAGCAAAGAATCTCAGCTCTGAGTTCACTAAACCATCAGCACTCATCAACCCCCTCTCGGCAGGACATCGGTACAAGCTGTGTCCTCGTCCAAACCTGAGAGGACGGTGTACGGTCACAGCCTCAAAGTTTGATTTTGATTGGATAACGAAAGAAAGAGTTAAGAAAATCAAAGTAAAGGGAATTATAACAGCCAAACAAGGCTTGTTACCTTCCGTTGGCTTCACCGATTTACTCGGAATATCACTGCTCGTCGAGCTTATCAGCGCCGAGACTGACCCCCGGACGCTTATGGAGAAGGATCCTGTGAAGGATCACGCACGACGTTTAGTGATTGATGCACATGGTGAGGATCAG…
BrrLOX10	ATGTTTTGTAAAGAGGCATCGTCCAGTCTCCAGACCTTAAACATAGCAAAGAGTCTCAGCTCTGAGTTCACTAAACCATCAGCACTCATCAACCCCCTCTCGGCAGGACATCGTTACAAGCTGTGCCCTCGTCCAAACCTCAGAGGACGATGTACGGTCACAGCCTCAAAGTTTGATATTGATTGGATACCGAAAGAAAGAGTTAAGAAAATCAAAGTAAAGGGAATTATAACGGCCAAACAAGGCTTGTTACCTTCCGTTGGCGTCACCGATTTGCTTGGAGTTTCACTGCTTGTCGAGCTTATTAGCGCCGAGACTGACCCCCGGACGCTTATGGAGAAGGATCCGGTGAAGGATCACGCACGACGTTTAGTGATTGATGCACATGGTGAGGATCAG…
BrrLOX11	ATGTTTTGTAAAGAGGCGTCGTCCAGTCTCCAGACCTTAAACATAGCAAAGAGTCTCAGCTCTGAGTTCACTAAACCATCAGCACTCGTCAACCCCCTCTCGGCAGGACATCGTTACAAACTGTTTCCTCGTCCAAATCTCAGAGGACGATGCACTGTCACAACCTCAAAGTTTGATATTGATTGGATAGCGAAAGATAATGTTAAGAAAATCAAAGTGAAGGGAATTATAACGGCCAAACAAGGCTTGTTACCTTCCGTTGGTGTCACCGATTTGCTCGGAGTTTCACTGCTCGTCGAGCTTATTAGCGCCGAGACTGACCCCCGGACGCTTATGGAGAAGGATCCGGTGAAGGATAACGCACGACGTGTATTGTTGGATGCACATGGTGAGGATCAG…
BrrLOX12	ATGTTTTGTAGAGAGGCGTCGTCCAGTCTCCAGACCTTAAGCATAGCAAACAGTCTCAGCTCTCAGTTCACTAAACCATCAGCACTCATCAACTCCCTCTCGGCAGGACATCGTTACAAGCTGTGTCCTCGTCCAAACCTCAGGGGACGATGTACGGTCACTGCCTCAAAGTTTGATATTAATGGGAAAGGTAAAATAGTGAAAGACGAAGTTAAGAAAATCAAAGTAAAGGGAACTATAACGGTGTTGTCCGAAGAAAAAAAAAAGAAGGGAACTATAATGGCCCAAGAAGGCTTGTTACCTTCCGTCGGAGAATCACTGCTCGTCGAGCTTATTAGCGCCGAGACTGACCCCCGGACGCCAATGGAGAAGGATCCAGTGGAGGATTACGCACAACGT…
BrrLOX13	ATGTTTATAGCGTCTCCGGTGAAAACGAACTTATACGGCGTCGGCTTAGTGAGATCTCCGGCGTTTCCCGTACTTCCACGTAGGCTACAACACCGAGTTCCTCTCTCCAGACAAGTTCGAGCTGTGATCTCGCGGGAAGAAAAGGCGGTGGATCAAGAAGATGAGAAAAGTATAAACAGATCAGTCGTATATAGTAGCTCTCCTGCGTTTCCATGGCAGAGATCTAAGTATACAGGAACAAAAACGGTTATGGCGGTCGTGAAGATCAGGAGGAAGATGAGGGAGAAGCTAACCGAGAGGCTCGGGCATCAGTTTGAGCTTTTAATGAAAGCTGTCGGTCAAGGGATGTTGGTTCAGCTTGTTAGTGAAGATATAGATCCTGAAACTGGTTCAGGTAGG…
BrrLOX14	ATGGCCTTAGTTAAAGAGATAATGGGTCATCCTCTGATATCAGGAAGGCCATCACTTGTTTTCTCGGCTTCTCATTTCAAGAAGAAGACACAGACAACGCAATTCTCGATCAAGCCTTTCGATCGGAGACCAAAAACGTCCAAATCCGGCGTCGTTTCGGCCATTAGTGAAGATTTAGTAAAAACGCTGCGTTTTAGCACAACAACCGGAGACAGAAAGAGCGAGGAGGAGGAGAAAGCGGCGGTGAAATTCAAAGTGAGAGCTGTGGTTACAGTGAGGAACAAGAACAAGGAGGATTTTAAGGAGACTCTTTTTAAGCATTTGGATGCTTTTGGTGACAAGATCGGTCGGAACATCGTCTTGGAGCTTATTAGCACCGAACTTGATCCAAAAACGAAT…
BrrLOX15	ATGGCCTTAGCTAAAGAGTTAATGGGTTATCCTTTGACTTCCAAAAGGCCATTACTTGTTTGGTCGGCGTCGCATTTCAAGAAGAGGACACAGCCAACACAATTCTCGATCAAGCCTTTTGATCGGAGACCAAGAACGTCCAAATCCGGGGTCGTTGCAGCCATCAGTGAAGATTTGGTCAAAACGCTACGTTTCAACACAACCACCGGTGACAGAAAGAGCGAGGAGGAGGAGAAAGCGGCGGTGAAATTCAAGGTGAGAGCTGTGGTTACGGTGAGGAACAAGAACAAGGAGGATTTTAAGGAGACTCTTGTTAAGCATTTAGATGCTTTTGGTGATAAGATCGGTCGAAACATTGTCTTGGAGCTTGTTAGCACCGAACTTGATCCAAAAACGAAT…
