# Supplementary material for: Genome-wide identification and expression pattern analysis of lipoxygenase gene family in turnip (Brassica rapa L. subsp. rapa)
Source: PeerJ. 2022 Jul 22;10:e13746. doi: 10.7717/peerj.13746 (PMC9310782; doi:10.7717/peerj.13746)
Supplement: Supplemental Information 5 [file peerj-10-13746-s005.xlsx]

## Sheet: Sheet1
Table S4. Plant LOX protein sequences used for phylogenetic tree construction.
Organism	Sequence ID	Sequence
Brassica rapa L. subsp. rapa	BrrLOX1	MIGDLVDLLTGGGGNAAKVKGTVVLMKKNVLDFNDFNASFLDRLHEFLGNKVTLRLISSDVTDPENGSNGKLGKAAHLED WITTITSLTAGESAFKVTFDYDQDFGYPGAFLIRNSHFSEFYLKSLTLEDVPGHGRVHYICNSWVYPAKRYTKDRVFFSN KTYLPHETPEALLKYREEELVSLRGTGEGELKEWDRVYDYAYYNDLGVPPKNPRPVLGGSQEYPYPRRGRTGRKPTTEDP ETESRLPVTSSLDIYVPRDERFGHLKMSDFLAYALKAIAQIIQPALESVFDETPKEFDSFEDVLKIYEEGIDLPNQALID SIVKNIPLEMLKEIFRTDGQKFLKYPVPQVIKEDKTAWRTDEEFAREMLAGLNPVVIQLLKEFPPKSKLERETYG…
	BrrLOX2	MASLLDRIHELLGRRVSLHLISSLQPDPANEKRGRLGKAAHLEKWVTKIKTSVTAEETAFGVTFDWDESMGPPAAFVIKN HHRSQFYLKSLTLRNFPGGEGGAIHFVCNSWIYPSHRYRSDRVFFSNQAYLPSETPELVKELREQELKNLRGEEKGGELK EWDRVYDYAYYNDLGAPDKGPDSARPVLGGSLEFPYPRRGKTGRKPTKSDPKSESRLALLNLNIYVPRDERFSHVKFSDF LAYALKSVTQVLVPEIASLCDKTINEFDSFEDVFHLYDGSIKLANGHTISKLRDIIPWEMFRELVRNDGERFLKFPLPDV LKQSRSAWRTDEEFAREMLAGLNPVVISRLKDFPPKSKIDSAKYGNQNSSIREEHIEPHMNGISVQEALEQNKLF…
	BrrLOX3	MFCKESPSLQTLSTAQSLSSLFPKPSALINPILTGRRDKPCRRQNFRGRCKITASQSNIAQKGKLLKEKVKRIKVKGFIT AEEGLLESLSWLRPLDVITDIRGRSLLVELISAETDTRTVMEEGPVEDYAQRVWFESRNEKYECVFDMPEDFGTVGAIRV QNQHHREMFIKEMKLELPSGSVTFTCNSWVTPKSIDPTKRIFFSNKSYLPSATPEPLKKLRKEELETLQGNNRELVGEFA KHERVYDYDVYNDVGDPEKDERLARPVMGGLSHPYPRRCKTGRKPCEKDASSEKREGEFYVPRDEEFSSTKGTAFTGKAI LAALPSVFPQIEAALLDPNLPFPHFKSIEDLYEVGIDIPKDTGLLPMIPKLIKVVAEAQDNLLQFDPPILLNKDR…
	BrrLOX4	MFVASPVKTNSYGAGLVRFPAFPVLPRRRQHIVPLSRKVRAVISREEKTVDQEDGKNTNGSLVSNTPAFPWQRSKYTGTK TVIAVVKIRKKMREKLTERVEHQLELLMKAIGQGMLIQLVSEEIDPETGSGRKSSETPVLGLPKARNDSRYLEFTANFTV PTDFGKPGAILVTNLLSSEICLSEIIIREGSDTILFPGNTWIHSRNDNPEGRIIFASQTWLPSKTPAGIKELREKDLTSV RGNGEGERKPHERIYDYDIYNDIGDPRKKDRVRPILGVPERPYPRRCRSGRPLLSADTPFESRGKDKDEFYVPRDEVFED IKRDTFRAGRFKALFHNLVPSIAAALSNLDIPFTCFSDIDRLYKSDIVLRHTEPKNKGLGGFIDGILNVGETLLR…
	BrrLOX5	MALAKEIMGSRLIFERSSSLASSPFQSRLSIKKKTQRTQLSINPFDLSPMKAAISGGVVAAISEDLVKTLRFKTLGRNQE NEEVEKAVQFKVRAVVTVRNKNKEDFKETLVKHLDAFTDKIGRNVVLELISIQVDPKTNEPKKSKPAVLKDWSKKSNSKA EKVHYAAEFTVDSAFGLPGAITVTNKHQKEFFLENITIEGFACGPVHFPCNSWVQSQNDHPSKRIFFTNQPYLPSETPSG LRTLREQELENLRGNGKGERKLSDRIYDFDVYNDIGNPDISTELARPVFGGREFPYPRRCRTGRRSTDTDLVSERRVEKP LPMYVPRDEQFEESKKNTFAACRLKAVLHNLVPSLKASILAEDFANFGEIDSLYKEGLLLKLGIQDDMFKKFPLP…
	BrrLOX6	MASFLDRVHELLGRRVSLHLVSSLQPDPANEKRGRLGKAAHLEKWVTKIKTSVTAEETAFAVTFDWDESMGPPAAFVIKN HHHSQFYLKSLTLRNFPGGEGGPIHFVCNSWIYPSHRYRSDRVFFSNKAYLPNETPELLKELRKEELKNLRDNEKGGELK EWDRVYDYAYYNDLGAPDKGPDSARPVLGGSPDFPYPRRGKTGRKPTKSDPKSESRLALLNLNIYVPRDERFSHVKFSDF LAYALKSVTQVLVPEIASVCDKTINEFDSFEDVFHLYDGSIKLANGHTISKLRDVIPWEMFRELVRNDGERFLKFPLPDV LKESRSAWRTDEEFAREMLAGLNPVVISRLQEFPPKSNLDSTRYGNQHSSIREEHIKPHMNGLSVKEALGQNKLY…
	BrrLOX7	MFCKESSSGLQTLSIAKSLSSPFHKPSPLINPIWTGRRDKLCRPRNLGGRCKVTASQSNSEPKGNIMKEKVKKIKVKGYI QAEEGTVLEGLRWSRGLDDISDIAGRSLLVELISAETDNRTLMEKDPVEDYAQRVWFDGESPDEKYECEFNMPEDFGTVG AIRIQNQHHRDIFIKEMELELPSGSVTFSCHSWVAPKSVDPAKRIFFSSKSYIPSATPEPLKKLRKEELETLQGNNRKKV GEFEKHERVYDYDVYNDVGDPDKNDELARPVIGGLSHPYPRRCKTGRKSSKKDPSTEKREGDFYVPRDEEFSTTKGTAFT GKAILAALPSVFTQLESILLDPKSPFPHFKSIEDLFDVGINLPKDAGLLPMLPKLIKVLSEAQDDLLQFDPPILL…
	BrrLOX8	MFCKESSSGLQTLSIAKSLSSPFHKPSPLINPIWTGRRDKLCRPRNLGGRCKVTASQSNSEPKGNIMKEKVKKIKVKGYI QAEEGTVLEGLRWSRGLDDISDIAGRSLLVELISAETDNRTLMEKDPVEDYAQRVWFDGESPDEKYECEFNMPEDFGTVG AIRIQNQHHRDIFIKEMELELPSGSVTFSCHSWVAPKSVDPAKRIFFSSKSYIPSATPEPLKKLRKEELETLQGNNRKKV GEFEKHERVYDYDVYNDVGDPDKNDELARPVIGGLSHPYPRRCKTGRKSSKKDPSTEKREGDFYVPRDEEFSTTKGTAFT GKAILAALPSVFTQLESILLDPKSPFPHFKSIEDLFDVGINLPKDAGLLPMLPKLIKVLSEAQDDLLQFDPPILL…
	BrrLOX9	MFCKEASSGLQTLNIAKNLSSEFTKPSALINPLSAGHRYKLCPRPNLRGRCTVTASKFDFDWITKERVKKIKVKGIITAK QGLLPSVGFTDLLGISLLVELISAETDPRTLMEKDPVKDHARRLVIDAHGEDQYECVFDMPEDFGAVGAIRVLNEAHREI FLKEMKLELPDGPVTFTCNSWVASKSEDPTKRTFFSNKSYLPLQTPEPLKQLRKEELESLRGKNRKHSGEFEKFERVYDY DVYNDVGDPEKDPELARPVIGGLSHPYPRRCKTGRKPSRKYPSIETRKGEFYVPRDEEFTTIKGATFTGKAVLAALPAVF PQIEAALVDPNMPFPHFKSIEDLFEEGIELPKDAGLFPMIPRLVKAAAEADDILQFESPILLDKDRFSWIRDDEF…
	BrrLOX10	MFCKEASSSLQTLNIAKSLSSEFTKPSALINPLSAGHRYKLCPRPNLRGRCTVTASKFDIDWIPKERVKKIKVKGIITAK QGLLPSVGVTDLLGVSLLVELISAETDPRTLMEKDPVKDHARRLVIDAHGEDQYECVFDMPEDFGAVGAIRVLNEAHREI FLKEMKLELPDGPVTFTCDSWVASKSEDPTKRTFFSNKSYLPLQTPEPLKQLRKEELETLQGKNRKRDGEFKKFERVYDY DVYNDVGDPEKDPELARPVMGGLSHPYPRRCKTGRKPSRKYPSIETRKGDFYVPRDEEWSTVKGTAFTGTTILAALPAVF PQIEAALVDPNMPFPHFKSIEDLFEEGIELPKNAGIFSLIPRLVKTVAEADDILQFDSPILLDTDRFSWIRDDEF…
	BrrLOX11	MFCKEASSSLQTLNIAKSLSSEFTKPSALVNPLSAGHRYKLFPRPNLRGRCTVTTSKFDIDWIAKDNVKKIKVKGIITAK QGLLPSVGVTDLLGVSLLVELISAETDPRTLMEKDPVKDNARRVLLDAHGEDQYECVFDMPEDFGPVGAIRVLNQDLKEI FLKEMKLELPDGSVTFTFNSWVAPKSEDPTKRTFFSNKSYLPLKTPEPLKQLRKQELETLQGKNRERAGEFEKFERVYDY DVYNDLGSPDKDPELARPILGGLSHPYPRRCKTGRKPCDKDPSAETRKALEFYVPRDEEFTTVKGAQFTGTAVLAALPAV FPQIEAALVDPNMPFPHFKSIEDLFEEGIELPKDAGLFPVIPRLVKAAAEADDILQFESPSLLDKDRFSWIRDDE…
	BrrLOX12	MFCREASSSLQTLSIANSLSSQFTKPSALINSLSAGHRYKLCPRPNLRGRCTVTASKFDINGKGKIVKDEVKKIKVKGTI TVLSEEKKKKGTIMAQEGLLPSVGESLLVELISAETDPRTPMEKDPVEDYAQRDGHDDQYLQCVFDMPEDFGVVGAIRVV NLESKEIFLKEMKLEVPDGPVTFTFNSWVAPKSEDSTKRTFFSNKSYLPLKTPEPLKQLRKEELETLQGKNREGDSEFKK FERVYDYDVYNDVGNPDKDPELARPVLGGLSHPYPRRCKTGRKPCVIDPSTETRQKDFYVPRDEEFSKVKGDAFTGTAAL AALPAALQQIEAFLLDPNMPFPHFKSIENLFEEGIEIPKDTGLFSLIPRIFKAIAAKAEDILLFESPILLDKDRF…
	BrrLOX13	MFIASPVKTNLYGVGLVRSPAFPVLPRRLQHRVPLSRQVRAVISREEKAVDQEDEKSINRSVVYSSSPAFPWQRSKYTGT KTVMAVVKIRRKMREKLTERLGHQFELLMKAVGQGMLVQLVSEDIDPETGSGRRSLETPVLGLPKARNDPRNLEFTATFT VPTDFGKPGAILVTNLLSSEICLSEIIIRDGSDTILFPGNTWIHSRNDNPEGRIIFRSQPCLPSQTPAGIKELRENDLRS VRGNGKGERKPHERIYDYDVYNDLGDPRKKDRVRPILGGPERPYPRRCRSGRTLVSRDPPCESRGKDKDEFYVPRDEEFE DVKRDTFTAGRLKALFHNLVPSIAAALSNLDIPFTCFSDIDKLYKCDIVLRPTEPKDTGLGGFFGSFVDGILNVG…
	BrrLOX14	MALVKEIMGHPLISGRPSLVFSASHFKKKTQTTQFSIKPFDRRPKTSKSGVVSAISEDLVKTLRFSTTTGDRKSEEEEKA AVKFKVRAVVTVRNKNKEDFKETLFKHLDAFGDKIGRNIVLELISTELDPKTNLPKKSNAAVLQDWSEKSKTKAERVHYT AEFTVDAAFGTPGAITIMNKHQKEFFLECITIEGFALGPVHFPCNSWVQSQNDHPEKRIFFTNQPFLPSETPEGLRKLRG KELKNLRGDGTGVRKLSDRIYDFDVYNDLGNPDKSSELSRPKLGGRERPYPRRCRTGRQPTDTDNEAESRVEKPLPMYVP RDEQFEETKQDTFAAGRLKAVLHHLVPSLKASILADDFSDFGEIDDLYKEGLLLKLGFQDEIFNKFPLPKGIVNT…
	BrrLOX15	MALAKELMGYPLTSKRPLLVWSASHFKKRTQPTQFSIKPFDRRPRTSKSGVVAAISEDLVKTLRFNTTTGDRKSEEEEKA AVKFKVRAVVTVRNKNKEDFKETLVKHLDAFGDKIGRNIVLELVSTELDPKTNMPKKSNAAVLKDWSKKSKTKAERVHYT AEFTVDAAFGSPGAITVMNKHQKEFFLESITIEGFAVGPVHFPCNSWVQSQKDHPEKRIFFTNQPFLPSETPDGLKKLRE RELKNLRGDGSGVRKLSDRIYDFDVYNDLGNPDKSSELSRPKLGGKEIPYPRRCRTGRHPTDTDKEAESRVEKPLPMYVP RDEQFEETKQKTFAAGRLKAVLHHLVPSLKASILAEDFADFGEIDGLYKEGLLLKLGFQDEIFNKFPLPKAIVNT…
Raphanus sativus L	RsLOX1	MIGDLVDLLTGGGRNAAKVKGTVVLMKKNVLDFNDFNASFLDRLHEFLGNKVTLRLISSDVTDPENGSNGKLGKAAHLEDWITTITSLTAGESAFKVTFDYDQDFGYPGAFLIRNSHFSEFYLKSLTLEDVPGHGRVHYICNSWLYPAKNYTKDRVFFSNKTYLPHETPQPLLKYREEELVSLRGTGEGELKEWDRVYDYAYYNDLGVPPKNPRPVLGGSQEYPYPRRGRTGRKPTKEDPETESRLPVTSSLDIYVPRDERFGHLKMSDFLAYALKAIAQIIQPALESVFDETPNEFDSFEDVLKIYEEGIDLPNQDLIDSIVKNIPLEMLKEIFRTDGQKFLKYPVPQVIKVDKTAWRTDEEFAREMLAGLNPVVIQLLKEFPPKSKLDSETYGDQNS…
	RsLOX2	MIHTHIAEILCVKPKTKKIKTLEEGVKDKKTKKTMKIEGEVVVMKKNLLDFKDTMASLLDRIHELLGRRVSLHLISSLQPHPANEKRGRLGKAAHLEKWVTKIKTSVTAEETAFGVTFDWDESMGPPAAFVIKNHHRSQFYLKSLTLRNFPGGEGGPIHFVCNSWIYPSHRYRSDRVFFSNKAYLPSETPELVKELREEELKNLRGDKKEGELKEWDRVYDYAYYNDLGAPDKGSDSARPVLGGSLEFPYPRRGKTGRKPTKSDPKSESRLALLNLNIYVPRDERFSHVKFSDFLAYALKSVTQVLVPEIASLCDKTINEFDSFEDVFHLYDGSIKLANGHTISKLRDIIPWEMFRELVRNDGERFLKFPLPDVLKQSRSAWRTDEEFAREMLAGLNPV…
	RsLOX3	MALAKEIMGSRLIFERSSSLASSPFQSRLSIKKKTQRTQFSINPFDLRPMKAAISGGVLAAISEDLVKTLRFNTLGRNQETEEEVEKEVQFKVRAVVTVRNKNKEDFKETLVKHLDAFTDKIGRNVVLELISTQVDPKTNEPKKSKPAVLKDWSKKSNSKAEKVHYTAEFTVDSAFGSPGAITVTNKHQKEFFLENITIEGFACGPVHFPCNSWVQSQNDHPSKRIFFTNQPYLPSETPSGLRTLREQELENLRGNGKGERKLSDRIYDFDVYNDIGNPDVSRELARPVLGGREFPYPRRCRTGRPSTDTDLMAERRVEKPLPMYVPRDEQFEESKKDTFAACRLKAVLHNLVPSLKASILAEDFASFAEFDSLYKEGLLLKLGIQDDMFKKFPLPKIV…
	RsLOX4	MFVASPVKTNFYGAGLVRSPAFPVLPRRQQHLVPLFRQVRAVISREEKSVDQEDGKNTNGSLVSSSPAFPWQRSKYTGTKTVIAVVKIRKKMREKLTERVEHQLELLMKAIGQGMLIQLVSEEIDPETGSGRRSSETPVLGLPKARNDPRYLEFKANFTVPTDFGKTGAILVTNLLSSEICLSEIIIHDGSDTILFPGNTWIHSRNDNPEGRIIFTSQTCLPSETPAGIKELREKDLTSVRGNGEGERKPHERVYDYDIYNDIGDPRKKERLRPVLGVPERPYPRRCRSGRPLLSDTPFESRGKDKDEFYVPRDEVFEDIKRDTFRAGRFKALFHNLVPAIAAALSNLDIPFTCFSDIDRLYKSDIVLRHTEHKDKSLGGFIDGILNVGETLLRYDTPA…
	RsLOX5	MIHTDIAEILCVKPKAKKRTKTMEEDVKKKKKTKKSMKIEGEVVVMKKNLLDFKDAVASFLDRVHELLGRRVSLHLISSLQPDPANEKRGRLGKAAHLEKWVTKIKTSVTAEETAFAVTFDWDESMGPPAAFVIKNHHHSQFYLKSLTLRNFPGVEGGPIHFVCNSWIYPSHRYRSDRVFFSNKAYLPDETPELIKELREEELKNLRGNETGSDLKEWDRVYDYAYYNDLGAPDKGPDSARPVLGGSTEFPYPRRGKTGRKRTRSDPRSESRLALLNLNIYVPRDERFSHVKFSDFLAYALKSVTQVLVPEIASVCDKTINEFDSFEDVFHLYDGSIKLANGHTISKLREVIPWEMFRELVRNDGERFLKFPLPDVLKESRSAWRTDEEFAREMLAGLN…
	RsLOX6	MFCKESTSSGLQTLSIAKSLSSPFHKPSPRINVPIWTGRRDKMCRRQNLSGRCKVRASQSNSGKKGDIVKEKAKKIKVKGFIKAQEGTLLEGLRWSRGLDDIADITGRSLLVELIAAETDTRTLMEKDPVEDYAQRVWFDGDSAEEKYECVFDMPEDFGTVGAIRIQNQHHREIFITDMELELPSGNVTFSCHSWVAPKSVDPAKRIFFSSKCYLPSTTPEPLKKLRKEELETLRGQNREKVGEFAKHERIYDYDVYNDVGNPDKDDELARPVIGGPSHPYPRRCKTGRKRSKKDPSTENREGEFYVPRDEEFSPTKGTAFTGKAVLAALPSVFTQIESIMLDPKSPFPHFKAIEDLFDVGINLPKDTGLLPMIPKLIKVVAEAQDDLLQFDPPVLLNR…
	RsLOX7	MFCKEASSSLQTLNIAKSVSSQFTKPLALINPLPAGHRYKVCPRPNLRGRCTVTASKLSDLKDKILKEKVKKIKVTGIITTKEIIGGLVRTFLQRSLLVELISAETDPRTLMEKDPVEDYAGNVLFDGVGEDQFKCEFDMPEDFGEVGAIRVVNHERQEIFLKEMKLELPDGPVTFTINSWVAPKSEDPTKRTFFSNKSYLPLKTPEPLKKLRKEELETLQGKNREKGAGEFEKFERVYDYDVYNDVGDPDKDPELARPVIGGLTHPYPRRCKTGRRPCRKDPSSETRKGEFYVPRDEEFTTIKGATFTGKAVLAALPAVFPQIEAALVDPHMPFPHFKSIEDLFEEGMKLPKDAGLFPMIPRLVKAAAEVDDVLQFEAPILLDKDRFSWIRDDEFARQ…
	RsLOX8	MFCKEASSSLQTLNIAKSLGSEFTKPSTLINPLSAGHRFKVCPRPNLRGRCAITSSKLSDLTDIIVKDRFKKIEVTGTITTKETIGLSASLIGSLLVELISAETDPRTLMEKDPVTDNARSVLFDGLGEDQYKCRFFMPEDFGEVGAIRVLNLELIEIFLKEIKLELPDGPVTFTCNSWVAPMTKDPTKRTFFSNKSYLPLKTPEPLKKLRKEELETLQGKNRERAGEFEKFERVYDYDVYNDLGNPDKDPELARPIMGGLSHPYPRRCKTGRKPCRKDPSSETRKGEFYVPRDEEFTTVKGIQFTGSAVLAALPAVLPQIEAALVDPNMPFPHFKSIEDLFEEGIELPKDAGLFPVIPRLVKAAAEADDILQFESPSLLDKDRFSWIRDDEFARQTLA…
	RsLOX9	MFCKEASSSLQTLNIAKSLGSEFTKPSALINPHSAGHRFKVCPRPNHRGRCTVTASKFSDLTDKIVKDRFKKIEVTGIITTKETIGLSASLIGSLLVELISAETDPRTLMEKDPVKDNARSVLFDGPGEDQYKCRFYMPEDFGEVGAIRVLNLELIEIFLKEIKLELPDGPVTFTCNSWVAPMTKDPTKRTFFSNKSYLPHQTPEALKQLRKEELETLQGKNRKRAGEFEKFERVYDYDVYNDVGDPDKDPELARPVMGGLSHPYPRRGKTGRKPCRKDPSCESRKGDFYVPRDEEFSTVKGIQFTGTTVLAALPAVLPQIEAALVDPNMPFPHFKSIEDLFEEGIKLPKDGGLFPMIPRLFKAVAEANDILQFESPSLLDKDRFSWIRDDEFARQTLA…
	RsLOX10	MFIASPVKTNLYGVSLVRSPAFPVLPRPLRHRVPLSRQVRAVISREEKAVDQEDEKSTNRSVVYSSSPAFPWQRSKYTGTKTVMAVVKIRKKMREKLTERLEHQFELLLKAVGQGMLIQLISEEIDPETGSGRRSLETPVLGLPKTRNDPRNLEFTATFTVPTDFGKPGAILVTNLLSSEICLSEIIIRDGSDTILFPGNTWIHSKNDNPEGRIIFRSQPCLPSHTPAGIKELREKDLRSVRGNGKGERKPHERIYDYDVYNDLGDPRKKDRVRPILGGPERPYPRRCRTGRPLVSRDPPCESRGKDKEEFYVPRDEEFEDIKRDTFTAGRLKALFHNLVPSIAAALSNLDIPFTCFSDIDKLYKCDIVLRPTEPKDTGLVGFIGGFVDGILNVGETLL…
	RsLOX11	MALGKEIMGHPLISERPSLIFSASHFKKKTHTTQFSIKPFDRRPRTSKSGVVSAISEDLVKTLRFSTTTGDRKREEEEKAAVKFKVRAVVTVRNKNKEDFKETLVKHLDAFGDKIGRNIVLELISTELDPKTNLPKKSNAAVLKDWSKKSKTKAERVHYTAEFTVDAAFGTPGAITIMNKHQKEFFLECITIEGFALGPVHFPCNSWVQSQNDHPEKRIFFTNQLTSLRGDGTGVRKLSDRIYDFDVYNDLGNPDKSSELARPKLGGKERPYPRRCRTGRQPTDTDKEAESRVEKPLPMYVPRDEQFEETKQDTFAAGRLKAVLHHLVPSLKASILAEDFSDFGEIDDLYKEGLLLKLGFQDEIFNKFPLPKGIVNTLQESSKGLLKYDTPKILSKDKN…
Arabidopsis thaliana	AtLOX1	MFGELRDLLTGGGNETTTKKVKGTVVLMKKNVLDFNDFNASFLDRLHEFLGNKITLRLVSSDVTDSENGSKGKLGKAAHLEDWITTITSLTAGESAFKVTFDYETDFGYPGAFLIRNSHFSEFLLKSLTLEDVPGHGRVHYICNSWIYPAKHYTTDRVFFSNKTYLPHETPATLLKYREEELVSLRGTGEGELKEWDRVYDYAYYNDLGVPPKNPRPVLGGTQEYPYPRRGRTGRKPTKEDPQTESRLPITSSLDIYVPRDERFGHLKMSDFLAYALKAIAQFIQPALEAVFDDTPKEFDSFEDVLKIYEEGIDLPNQALIDSIVKNIPLEMLKEIFRTDGQKFLKFPVPQVIKEDKTAWRTDEEFAREMLAGLNPVVIQLLKEFPPKSKLDSESYGNQ…
	AtLOX2	MYCRESLSSLQTLNVAKSLSSLFPKQSALINPISAGRRNNLPRPNLRRRCKVTASRANIEQEGNTVKEPIQNIKVKGYITAQEEFLEGITWSRGLDDIADIRGRSLLVELISAKTDQRITVEDYAQRVWAEAPDEKYECEFEMPEDFGPVGAIKIQNQYHRQLFLKGVELKLPGGSITFTCESWVAPKSVDPTKRIFFSDKSYLPSQTPEPLKKYRKEELETLQGKNREEVGEFTKFERIYDYDVYNDVGDPDNDPELARPVIGGLTHPYPRRCKTGRKPCETDPSSEQRYGGEFYVPRDEEFSTAKGTSFTGKAVLAALPSIFPQIESVLLSPQEPFPHFKAIQNLFEEGIQLPKDAGLLPLLPRIIKALGEAQDDILQFDAPVLINRDRFSWLRDDE…
	AtLOX3	MALAKELMGYPLITERSSLVSSASHFKKRTQSTQFSINPFDRRPRKTKSGVVAAISEDLVKTLRFSTTTGDRKSEEEEKAAVKFKVRAVVTVRNKNKEDLKETLVKHLDAFADKIGRNIVLELISTQLDPKTKLPKKSNAAVLKDWSKKSKTKAERVHYTAEFTVDAAFGSPGAITVMNKHQKEFFLESITIEGFALGPVHFPCNSWVQSQKDHPDKRIFFTNQPYLPNETPSGLRVLREKELKNLRGDGSGVRKLSDRIYDFDVYNDLGNPDKSSELSRPKLGGKEVPYPRRCRTGRQSTVSDKDAESRVEKPLPMYVPRDEQFEESKQDTFAAGRLKAVLHHLIPSLKASIVAEDFADFGEIDRLYKEGLLLKLGFQDDIFKKFPLPKVVVDTLQES…
	AtLOX4	MALANEIMGSRLIFERSSSLASPFHSRFSIKKKTQRTQFSINPFDPRPMRAVNSSGVVAAISEDLVKTLRISTVGRKQEKEEEEEKSVKFKVRAVATVRNKNKEDFKETLVKHLDAFTDKIGRNVVLELMSTQVDPKTNEPKKSKAAVLKDWSKKSNSKAERVHYTAEFTVDSAFGSPGAITVTNKHQKEFFLESITIEGFACGPVHFPCNSWVQSQKDHPSKRILFTNQPYLPSETPSGLRTLREKELENLRGNGKGERKLSDRIYDYDVYNDIGNPDISRELARPTLGGREFPYPRRCRTGRSSTDTDMMSERRVEKPLPMYVPRDEQFEESKQNTFAACRLKAVLHNLIPSLKASILAEDFANFGEIDSLYKEGLLLKLGFQDDMFKKFPLPKIVT…
	AtLOX5	MIHTDIAEILCVKPKTTKKTKTMEEDVKKTTTMKIEGEVVVMKKNLLDFKDVMASLLDRVNELLGRRVSLHLISSHQPDPANEKRGRLGKAAHLEKWVTKIKTSVTAEETAFGVTFDWDESMGPPAAFVIKNHHHSQFYLKSLTLRGFPDGEGGATAIHFICNSWIYPNHRYRSDRVFFSNKAYLPSETPELIKELREEELKNLRGNEKGGEFKEWDRVYDYAYYNDLGAPDKGPDSVRPVLGGSPELPYPRRGKTGRKSTKSDPKSESRLALLNLNIYVPRDERFSHVKFSDFLAYALKSVTQVLVPEIASVCDKTINEFDSFEDVFHLYDGSIKLANGHTISKLRDVIPWEMFRELVRNDGERFLKYPLPDILKESRSAWRTDEEFAREMLAGLNPV…
	AtLOX6	MFVASPVKTNFNGVSLVKSPAFSALSCRKQHRVPISRQVRAVISREEKAVDQEDGKKSTNKPLINSSQFPWQRSKYTGSKTVTAVVKIRKKIKEKLTERFEHQLELFMKAIGQGMLIQLVSEEIDPETGKGRKSLESPVMGLPKAVKDPRYLVFTADFTVPINFGKPGAILVTNLLSTEICLSEIIIEDSTDTILFPANTWIHSKNDNPQARIIFRSQPCLPSETPDGIKELREKDLVSVRGDGKGERKPHERIYDYDVYNDLGDPRKTERVRPVLGVPETPYPRRCRTGRPLVSKDPPCESRGKEKEEFYVPRDEVFEEIKRDTFRAGRFKALFHNLVPSIAAALSNLDIPFTCFSDIDNLYKSNIVLGHTEPKDTGLGGFIGGFMNGILNVTETLLK…
Gossypium hirsutum L	GhLOX1	MFNKTMVKCCGKPETNDKGMVEEKKNKNKIKGALVLMKKNVLDVSDLKSSLLDRVHELLGKGVSLQLISAVHTDPANGLRGKLGKPVYLEKWVTTKAPLTAGETKLDVEFEWDESMGVPGAFMIKNNHHSQFYLGTLTLEDVPGHGRLQFVCNSWVYPAHRYNHHRVFFSNKTYLPCQTPEPLRKYREEELVNLRGNGKGKGKLNEWDRVYGYDYYNDLGMPERGVHFARPVLGGSPALPYPRRGRTGRKPHKKDPNTESRLSLLNSNIYVPRDERFNMVKFSDFLAYAFKSLFQVLVPEIAALGDKTINEFDSFQDILDLYEGGIKLPNNDTLKKIKDCLPWEMIKELVRNDGERLMKFPMPAVINDNRSAWRTDEEFARETLAGVNPVVISRLEEFP…
	GhLOX2	MLAFKPKPSSLRSTFSGTALRSPPRLYGVPVLLSFSWTTRSRPLVRAVISDDKAVETAKTSPLNQKHSNGSSDSSSKQVKAVVTIKKKMKENITEKIENKWEMLMNGIGRGILIQLISEEIDPVTNSGKSVEACVRGWLPKPPEHDNILQYVADFTVPSDFGRPGAVLITNQHAKEFHLLEIVVQDFDGVPIYFSANTWIHSRNDNPESRIIFRNQAYLPSQTPPGIKDLRREDLLSICGNGKGERMPHERIYDYDVYNDLGKPDKDKDLARPVLGGEERPYPRRCRTGRPASKIDPLCESRIEKPHPVYVPRDEAFEEIKQDTFSAGRLKALLHNLVPLMAATLSSSDIPFTCFSEIDKLYNDGFILKDDEQRKLGDNLFIGNMMKQVLNVGQKLLKY…
	GhLOX3	MWKNICIYKKQTKCNVENAETGQEKETIKAYAHRVKQKGDDVTYEAEFKVGQDFGEIGAVVVENEHHKEMFLVEIVLDGLTDPITISCNSWVHSKFDNPQKRVFFPPKSYLPSQTPSGLKRLRKEELQTLRGNGVGERKSFERIYDYDVYNDLGDPDSDLNKKRAVLGGNKQFPYPRRCRTGRPRCESDPESETKSNMFYVPRDECFSEVKQLTFSAKTVYSVFHAVVPALQTAIVDKDLGFPYFTAIDQLFNEGVDLPPQEGNNLWREILPRLLKAISDSDNALRFEIPETMERDKFFWFRDEEFARQTLSGINPCALQLVTEWPLKSKLDPAIYGPPESVITKEMVEQQIRGFCSLEEALKQKKLFVLDYHDLFLPYVKKVRQLPGTTLYGSRTLFF…
	GhLOX4	MAGTKIEISGPKSLFSNEFLSNSTSLLNSRKRITVEVRKPVATTAAFTAVQMVAKLIELDSVKVIPETPVQFTVSGQVTVEYDAMEQMKELMFNWWDSSKTTIDAQKGVFLQLVSSDIDPTKLLICLEINEGTGKAKVSKEAILDWSRDLHINADKFVTHEVQFLVDGNFGFPGAILVTNKNSKEFYLKCITLEGCLHFDCQSWVQPEKLHPEKRIFFTDKAYLPHETPMGLRELREKELRELRGNGEGVRVLSDRIYDYDVYNDLGNPDKGLEFARPVLGGQRRPYPRRCRTGRPSTKSDPKAESPVNETTPMYVPRDEAFVDEKKRSVDAGSWKGMMNNLFPFFKHSTESDSVNSFADINNLYKESRNHSNFPVESTADAFKFDPPNIVSRDASCCL…
	GhLOX5	MMPMYVPRDEAFSDGKRRTVDAGSRKGMMNNLFPFFKHSIEGDSINSFADINNLYKESRNHSNFPVESTADAFKFDPPNIVSREASCCLRDDEFGRFTLAVMNPISIERLKVFPPVSKLDPSIYGPTQSALREEHLISHLDGMSVQQAIEKKKLFTLDYHDVFLPFLSSINAHPNRKAYATRTIFLLTQFGTLKPIAIELSLPSMNPFKPSKQVITPTEDATSNWQWQLAKAHVCSNDSGAHELIQHWLRTHACREPFIIAARRHLSVMHPIHKLLHPHMRYTMDINARARELLINADGIIESLFSTKECSMEITSLAYKNWRFDMESLPADLIRRGIAEQDPTEPHGIKLLIEDYPYANDGLLIWSAIERLVKDYVNHYYPDSNSIRSDSELNTWYYE…
	GhLOX6	MILGNLASSVGNVVGDITGLNKPSKNTITGSVVIVKKNVLDFTAVHSTVADSLFELLGNQVSLQLVSAENPDPANDNGGKLGKLATLEYWNLTYTPLLAGDDSLYKVSFEWDEEFGIPGAIILRNNHTAEFFLKTITLENVPGEGRIHFVCNSWVYPDRRYKKPRIFFSNKTYLPHETPAALRKFREEELQVLRGDGTGQLKTGDRVYDYALYNDLGDPDKGADLARPVLGGLAQYPYPRRGRTSRPPSKTDPKTESRLFLPNILNIYVPRDEQFAHLKLSDFIAYNLKGLVNQIIPLLEAFVNYTPNEFDSFKDVDNLFFSGLPLPTDLINQVANNIPLEMMGEFFRSDGQQLLKFPVPKLIEADRSNPFAWRTDEEFGREMLAGLNPLLIQLLKEFP…
	GhLOX7	MVLGDLASSIGNVVSDITGINKTTKTVTGSVVLVKKNFLDFTSLTSTVVDGLFELLGNGVTLQLVSAENTDPANENGGKLGKLEALEYWNLTYTPPLAGSDSLYKVSFEWDEELGIPGAIILRNNHAAEFFLKTITLEDVPGEGRIHFVCNSWVYPDKHYKQPRLFFANKTYLPHEMPAALRKYREEELKVLRGDGTGELKTGDRIYDYALYNDLGDPDNGADLARPVLGGSAQYPYPRRGRTGRPPSKTDPNTESRVFLPEVLNIYVPRDEQFGHLKLSDFIAFNLKGLVNQIIPLLEAYVNLTPNEFDSFKDVDNLYFNGIPLPTDLINQIASNIPLEMMQEFFRSDGQQLLKYPVPQVIQADRSNPIAWRTDEEFGREMIAGLNPLLIQLLKEFPP…
	GhLOX8	MEEDDEKMKIKGTVVLMKKNVMDMNDLTASFLDRVYELFGRGVSLQLISAVYTDPANEMRGKLGKPANLEKWITKITPLTAGEITFSVTFEWDESIGVPGAFIIKNRHHSQFYLKTVTLEDVPGHGRVHFVCNSWVYPTHRYKYHRVFFSNKTYLPSQMPVPLRKYREEELVNLRGDGKGCLKEWDRVYDYDFYNDLAMPERGHDFHRPVLGGSLDCPYPRRGRTGRKPHKKDSRTESRLFLLSLKIYVPRDEQFSLVKFSDFVAYALKSLFQVLIPEVAALCDKTINEFDSFQDVLDLYEGGIKLPNDATLKKIRDCVPWEMIRELVRNDGERLMKFPMPAVIKEDRSAWRTDEEFARETLAGVNPVIISRLQEFPPASKLDPEVYGNQKSTITKEHI…
	GhLOX9	MAVAKEMMGCSSFVSSSKVFLNSTYGFQQKQNRFLFVKPVWVPMEQKRRVHLRKAAKVPVVAAISEDLIKAKAKAVPAQKEKAVEFKVTATITIRNKNKEDFKETLVKHFDAFTDMIGRNVVLELISTEEDPKTMAPKRSKEAVLKDWSKKANVKAEKVYYTAEFTVDSNFGVPGAITVTNKHQKEFFLESITIEDFAYGPLHFPCNSWVQSNKHHPGKRIFFTNQPYLPDQTPKGLRALREKELDDLRGNGKGVRKLSDRVYDFDVYNDLGNPDKGIDYARPMLGGEKVPYPRRCRTGRGPSETDMEAESRVEKPLPIYVPRDEQFEESKQNAFSAGRLRAVLHNLLPQLKASISTHNRDLNSFSDIDGLYKEGLLLKLGFHETVKKLPKMVSKLQES…
	GhLOX10	MLSHLLHAVAGDDNGNKKMKPEKIKGTVILMKKNVLDFNDFHASFLDGFHELLGKRVSFQLISSQQVDADNGLQGKLGKEAYLEDWNSTETSAVAGESKFDVNFDFEEEIGLPGAFLIRNNHHSEFYLKTLTLEHVPGHGRLHFVCNSWVYPDKKYDNPRVFFTNKTYLPHEMPKPLLQYREQELMALRGNGQGELQESDRIYDYAYYNDLGNPDKGPEYARPVLGGSAKYPYPRRGRTGRPPAKSDPKTESRIPLLMSLNIYVPRDERFGHLKMSDFLAYALKSIVQFIVPELQDLTDKTHNEFDSLEDVLKLYYGGVKLPSGPLLDNIINNIPLEMLKEIFRTDEAQLLKFPVPQVIQDSKTAWRTDEEFAREMLAGVNPVIIRLLQEFPPKSNLDP…
	GhLOX11	MFNKTMVKCCGKPETNDKGMAEEKKNKNKIKGALVLMKKNVLDVSDLKSSLLDRVHELLGKGVSLQLISAVHTDPANGLRGKLGKPVYLEKWVTTKTSLTAGETKLDVEFEWDESMGVPGAFMIKNNHHSQFYLGTLTLEDVPGHGRLQFVCNSWVYPAHRYNHHRVFFSNKTYLPCQTPEPLRKYREEELVNLRGNGKGKGKLNEWDRVYDYDYYNDLGMPERGVNFARPVLGGSPALPYPRRGKTGRKPHKKDPNTESRLSLLNLNIYVPRDERFNMVKFSDFLAYAFKSLFQVLVPEIAALGDKTINEFDSFQDILDLYEGGIKLPNNDTLKKIKDCLPWEMIKELVRNDGERLMKFPMPAVINDNRSAWRTDEEFARETLAGVNPVVISRLEEFP…
	GhLOX12	MLAFKPKPSSLRSTFSGTALRPPPRLYGVPVLLSFSRTTRSRPLVRAVISDDKAVESAKTSPLDQKHSNGSSDSSSKQVKAVVTIKKKMKENITEKIENQWEMLMNGIGRGILIQLISEEIDPVTNSGKSVEAFVRGWLPKPQEHDNILQYVADFTLPSDFGRPGAVLITNQHAKEFHLLEIVIQDFDGVPIYFPANTWIHSLNDNPESRIIFRNQAYLPSQTPPGLKDLRREDLLSIRGNGKGERMPYERIYDYDVYNDLGKPDKERDLARPVLGGEERPYPRRCRTGRPASKIDPLCESRIEKPHPVYVPRDEAFEEIKQDTFSAGRLKALLHNLVPLMAATLSSSDIPFTCFSEIDKLYNDGFILKDDEQRKLGDNLFIGNMMKQVLNVGQKLLKY…
	GhLOX13	MLKPHVYHPHTTTKTLASPLHKPFSHGTALAFLPFNACSSLGKTAKPFKARVVPNKIKAAVDVNLTDDGILTDYTVKGVITVKQTVGGFLSNLGLSRGIDDIQDLLGKSILLELVSLELDPKTGQEKETIKAYAHRVKQKGDDVTYEAEFKVGQDFGEIGAVVVENEHHKEMFLVEIVLDGLTDPITISCNSWVNSKFDNPQKRVFFPPKSYLPSQTPSGLKRMRKEELQALRGNGVGERKSFERIYDYDVYNDLGDPDSDLKKKRPVLGGNKQFPYPRRCRTGRPRCESDPESETKSNMFYVPRDECFSEVKQLTFSAKTVYSVFHAVVPALQTAIVDKDLGFPYFTAIDQLFNEGVDLPPQEGNNMWREILPRLLKAISDSDNALRFEIPETMERDK…
	GhLOX14	MRGNGEGVRVLSDRIYDYDVYNDLGNPDKGLEFARPDLGGQRRPYPRRCRTGRFSTNLDPKSESPENEMMPMYVPRDEAFSDGKRRTVDAESRKGMMKNLLPFFKHSIEGDPINSFADINNLYKESRNRSKFPVESTADAFKFDPPNIVSREASCCLRDDEFGRFTLADMNPISIERLKVFPPVSKLDPSIYGPTQSALREEHLISHLDGMSVQQAIEKKKLFTLDYHDVFLPFLSSINAHPNRKAYATRTIFLLTQFGTLKPIAIELSLPSMNPFKPSKQVITPPVDATSNWQWQLAKAHVCSNDSGAHELIQHWLRTHACMEPFIIAARRHLSVMHPIHKLLHPHMRYTMDINARARELLINADGIIESFFSTKECSMEITSLAYKNWRFDMESLPA…
	GhLOX15	MAGTKIEISGPKSLFSNEFLCNSTSLLNSRKTRTVEVRKPVAATAALTAVQIVAKLIELDSVKVIPETPVQFTVSGQVTVEYDAMEQMKELMFNWWDSSKTTIDAQRGVFLQLVSSDIDPRTGKAKVSKEAILDWSRDLPINADKFVTHEVQFLVDGSFGVPGAILVTNKNSKELYLKSITLEGFLHFDCQSWVQPEKLHPEKRIFFTNKAYLPNETPMGLRELREKELRELRGNGEGVRVLSDRIYDYDVYNDLGNPDKGPEFARPVLGGQRRPYPRRCRTGRPSTKSDPKSESPVNETTPMYVPRDEAFGGEKKRSVDAGSWKGMMNNLFPFFKHSTDSDSVNSFADINNLYKESRNHSNFPVESTADAFKFDPPNIVSRDASCCLRDDEFGRFTLA…
	GhLOX16	MILGNLASSVGNVVGDITGLNKPSKNTITGSVVIVKKNVLDFTAVHSTVADSLFELLGNQVSLQLVGAENPDPANENGGKLGKLAALEYWNLAYTPLLAGDDSLRYKKPRIFFSNKTYLPHEKPAALREYREEELQVLRGDGTGQLKTGDRVYDYALYNDLGDPDKGADLARPVLGGSAQYPYPRRGRTSRPPSKTGSDYEENFKYDLFNDKFNIYVPRDEQFSLHKKVEFQINNWKSLIHAVPPGFKACIMGEFESFQEINTVYDVDDGTSGLSKAISRIGKFPLPQVIKAEDRVAWSSDEEFAREMIAGLNPLLIRLLKEHEFPPLSKLDPEFYGNQNSCITKQDIQSNLDGLSAEQALKNKRLFILDHHDSVMPYLRKINKETETKTYASRTLLFL…
	GhLOX17	MILGNLASSVGNVVGDITGLNKPSKNTITGSVVIVKKNVLDFTAVHSTVADSLFELLGNQVSLQLVSAENPDPANENGGKLGKLAALEYWNLTYTPLLAGDDSLYKVSFEWDEEFGIPGAIILRNNHTAEFFLKTITLENVPGEGRIHFVCNSWVYPDRRYKKPRIFFSNKTYLPHETPAALRKYREEELQVLRGDGTGQLKTGDRVYDYALYNDLGDPDKGADLARPVLGGSAQYPYPRRGRTSRPPSKTDPKTESRLFLPNILNVYVPRDEQFAHLKLSDFIAYNLKGLVNQIIPLLEAFVNYTPNEFDSFKDVDNLFFSGLPLPTDLINQVANNIPLEMMGEFFRSDGQQLLKFPVPKLIEADRSNPFAWRTDEEFGREMLAGLNPLLIQLLKDSS…
	GhLOX18	MAGTREILYSLPMATRLPTKSSIYNHFNRHLHQHNRLPRSNYLPYDSGKRLLVQPRKVVVVAATPIKAAAETAVQCQVKAVVTVKCGSMEYVKDMVFRWLDSDAHRAQTGVVLQLVSTQVDPNSENPKLSKEAKIYWSINPKTKGGNKISLEVEFVVDANFGVPGAIIVTNKYKKEFYLESIVAIEGLVHFACNSWVQPHGFHAHNRIFFSNKVYLPNDTPVGLKRLREKELQQLRGNSDDSRTTSDRIYDYDVYNDLGNPDKGDEFVRPILGNQSQPYPRRCRSKRPPTSSDVNVESPVSKYMPKYVPRDEAFGDLKAKAITEGKWKAMLRSLVPTLKQKAAINGEAIKSFSDITELYKESLPPFEEGGDECWEKGGLPKLLNKMIKECGQDVFKFDS…
	GhLOX19	MKEDDEKMKIKGTVVLMKKNVMDMNDLTASCLDRVYELFDRGVSLQLISAVYTDPANEMRGKLGKPANLEKWITKITPLTAGEITFSVTFEWDESIGVPGAFIIKNRHHSQFYLKTVTLEDVPGHGRVHFVCNSWVYPTHRYKYDRVFFSNKTYLPCQMPVPLRKYREEELVNLRGDGKGCLKEWDRVYDYDFYNDLAMPDRGHDFHRPVLGGSLDCPYPRRGRTGRKPHKKDSRTESRLFLLSLKIYVPRDEQFSLVKFSDFVAYALKSLFQVLIPEVAALCDKTINEFDSFQDVLDLYEGGIRLPNDATLKKIRDCVPWEMIRELVRNDGERLMKFPMPAVIKEDKSAWRTDEEFARETLAGVNPVIISRLQEFPPASKLDPEVYGNQKSTITKEHI…
	GhLOX20	MKKTPLLLQKADSSPNLHFPKPYLPDQTPKGLRALREKELDDLRGNGKGVRKLSDRVYDFDVYNDLGNPDKGIDYARPMLGGEKVPYPRRCRTGRGPSETDMEAESRVEKPLPIYVPRDEQFEESKQNAFSAGKLRAVLHNLLPQLKASISAHNRDLNSFSDIDGLYKEGLLLKLGFHETVKKLPKMVSKLQESSEGLLKYETPKVVSKDKFAWLRDDEFGRQALAGVNPVNIERLASFPPVSMLDPEIYGPQESALKEEHIAGQLNGMTVQQALDENKLFMVDYHDIYLPFLDRINALDGRKSYATRTIFFLTPSGTLKPVAIELSLPHTSPNSRSKRVVTPPVDATTNWIWQLAKAHVCSNDAGVHQLVNHWLRTHACMEPFILAAHRQLSAMHPIF…
	GhLOX21	MLSHLLHAVAGDDNGNKKMKPEKIKGTVILMKKNVLDFNDFHASFLDGFHELLGKRVSFQLISSQHVDADNGLQGKLGKEAYLEDWNSTETSAVAGESKFDVNFDFEEEIGLPGAFLIKNNHHSEFYLKTLTLEHVPGHGRFHFVCNSWVYPDKKYDNPRVFFTNKTYLPHDMPKPLLQYREQELMALRGNGQGELQEWDRVYDYAYYNDLGNPDKGPEYARPVLGGSAKYPYPRRGRTGRPPTKSDPKTESRIPLLMSLNIYVPRDERFGHLKMSDFLAYALKSIVQFIVPELQDLTDKTHNEFDSLEDVLKLYYGGVKLPSGPLLDNIINNIPLEMLKEIFRTDGAQLLKFPVPQVIQDSKTAWRTDEEFAREMLAGVNPVIIRLLQEFPPTSNLDP…
Fagopyrum tataricum L	FtLOX1	MHLTTIVLSGLPLGDVHIACNSWVHSKFDNPNKRIFFTNKSYLPSETPAGLKKHRARELELVRGDGQGERKSYDRIYDYDTYNDLGDPDNNPDLKRPVLGGKENPYPRRCRTGRRRCKTDSLSETRSNIVYVPRDEQFSGVKQLTFSATTLYCVLHAVVPSLETAMVDSELGFPYFTAIESLFDEGVKLPGIEKQIGLKDIIPRLVKAVTSSQEGILRFEPPALFNRDRFGWIRDEELARQTLAGLNPCSIQLVTEWPLKSKLDPEIYGPPQSAITTELVEKQIRGFCTVDEAIKQKRLFIIDYHDAFLPYVNQVRELKGTTMYGSRTLFFLLPNDTLKPIAIELTRPPSKTKPQWKEVFTPTGNATHCWLWRFAKAHFLAHDAGYHQLISHWLRTHCC…
	FtLOX2	MHLKSILLAGLPLADVHITCNSWVHSKFDNPQKRIFFANKSYLPSDTPDALKRFRAKELEILRGDGGGERKSFERVYDYDTYNDLGDPDNNADLHRPVLGGEEHPYPRRCRTGRPRCKTDPLSETRSSSVYVPRDEQFAEVKELTFSATTLHSVLHAVLPSLETAMIDSDLGFPYFTAIDSLFNEGVKLPGIPNFSLKDVLPSLVHAISDGEQDLLRFDSPALFDRDRFSWMRDEEFARQSLAGLNPCSISLVTEWPLKSKLDPKIYGPPESALTTELVERQIKGYYSVEEAIKQNKLFIIDYHDAFLPYVNKVREIKGTTMYASRTLFCLMPDQTLMPIAIELTRPPSDQKPQWKEVYTPIGDATASWLWRFAKAHVLAHDAGYHQLVSHWLRTHCCV…
	FtLOX3	MYIQNISLHGVSVNPIEFTCNSWVHSKLENPQRRIFFSDQLTLLPLQTPPYLRPLRDTELRNLRGNGQGERKKSDRIYDYDVYNDLGDPDADPELKRPVLVGPERPYPRRCRTGRPPTVTDPLSESRVEENYVPRDEKFSEVKQISFSANIVYAVLESLLPTLDGAVPGASFNFFTAIDTLFDEGVKIPNPPCGNRTLKDVLPQLVKPIQGNDEEAILRFDTPAAFFSDRFGWLKDEEFGRQTLAGLNPCSIQLVTEWPLRSNLDPSIYGPPESALTTELVERQIGGFITVQEALRQKKLFIIDYHDAFLPYVNKVRELGEGTTMYGTRTLFCLMPDGTLKPVAIELTRPPSTDGSKPQWKQVYTPTGASTNGWLWKFAKAHAIANDSGFHQLVTHWLR…
	FtLOX4a	MNSSEMSCCSKKSTRITGTVVLMKKNVLDLNDFVAGIHDRLHELLGHKVSLQLLYAHPGNAMFLGNDVKGKIGNPAYLEDWLTKLTGLRAGESAFHVSFEWDDHLGVPDAFIIRNDHHSEFYLKSLTLEDVPSHGRVYFLCNSWVYPAHRYKTSRVFFSNKTYLPQQTPELLRGFREEELLILRGNGQGKLEEWDRVYDYACYNDYGEPEKGPKYARPILGGSTEFPYPRRGRTGRKPTNKDPNCESRLPLVMSLDIYVPRDERFGHIKLADFVAYSLKAVTQALLPELEAISHIHPKDFESFEEVMKLYQGGIHLPNPTFLEKLKDAIPFELLRTLVHTDGKPLLKYPMPAIIKENKDGWRTDEEFAREMLAGINPLVIRRLQEFPPVSYLDTNVYGN…
	FtLOX4b	MNSSEMSCCSKKSTRITGTVVLMKKNVLDLNDFVAGIHDRLHELLGHKVSLQLLYAHPGNDVKGKIGNPAYLEDWLTKLTGLRAGESAFHVSFEWDDHLGVPDAFIIRNDHHSEFYLKSLTLEDVPSHGRVYFLCNSWVYPAHRYKTSRVFFSNKTYLPQQTPELLRGFREEELLILRGNGQGKLEEWDRVYDYACYNDYGEPEKGPKYARPILGGSTEFPYPRRGRTGRKPTNKDPNCESRLPLVMSLDIYVPRDERFGHIKLADFVAYSLKAVTQALLPELEAISHIHPKDFESFEEVMKLYQGGIHLPNPTFLEKLKDAIPFELLRTLVHTDGKPLLKYPMPAIIKENKDGWRTDEEFAREMLAGINPLVIRRLQEFPPVSYLDTNVYGNQNSTMT…
	FtLOX5	MVRRNRTTVRAVISSGDRTAESPAPSSKIPGMDGYDGSKNGPISSGVLQVTAAVLIRTKIKEKLIDKLEGLQRSFTNALGQGISLKLISEQIDPQTKAGKCVDSYVRDWTPTPTEQPYIVQYNADFIVPSDFGNPGAILVTNFHSKEFYLVEIVLSGFNGGPFYFSANSWIQSRNDDHESRIIFRNQTYLPSQTPPGMKDLRHEDLRSIRGNGKGERKMHERIYDYDCYNDLGNVEKDKELERPVLGGTERPYPRRCRSGRPPMKSDNRYESRIEKPHPVYVPRDEAFEEIKQATFSAGRLKAVLHNLIPQIAASLSSSDVPFSCFSDIDKLYNDGVVLREEEQVKTRSLPVILQQISKQIFSVGDRLFKYEMPAIIKRDRFAWLRDNEFARQALAGVN…
	FtLOX6a	MFCASGMKRKSANSKLENGMKRTIEGTVVLMKKNVLDVTDLSASFLDRIYEILGKGVTFQLISAVHLDSADGLQGKMGKTAYLEKWVTKLTPLTAGETRFNVTFEWDESMGFPGAIIIKNHHHSQFYLRTVTLEDVPGHGRVHFVCNSWVYPTHRYNYNRIFFANKTYLPQDTPGPLRKLREEELKNLRGNGKGMLKEWDRVYDYAYYNDLGMPNKGSDYARPVLGGSKDYPYPRRGKTGRKPTKKDPQTESRLPLLSLDIYVPRDERFDHLKFSDFLAYGLKALVQVLVPELKAVCDKTPNEFDTFGDVLNLYEGGFKLPKSTINKLQDRIPWELIKELVRTDGEGFLRLPMPDAVKEDQNAWRTDEEFGREMLAGVNPVIIRRLKEFPPVSKLDPSV…
	FtLOX6b	MFCASGMKRKSANSKLENGMKRTIEGTVVLMKKNVLDVTDLSASFLDRIYEILGKGVTFQLISAVHLDSDGLQGKMGKTAYLEKWVTKLTPLTAGETRFNVTFEWDESMGFPGAIIIKNHHHSQFYLRTVTLEDVPGHGRVHFVCNSWVYPTHRYNYNRIFFANKTYLPQDTPGPLRKLREEELKNLRGNGKGMLKEWDRVYDYAYYNDLGMPNKGSDYARPVLGGSKDYPYPRRGKTGRKPTKKDPQTESRLPLLSLDIYVPRDERFDHLKFSDFLAYGLKALVQVLVPELKAVCDKTPNEFDTFGDVLNLYEGGFKLPKSTINKLQDRIPWELIKELVRTDGEGFLRLPMPDAVKEDQNAWRTDEEFGREMLAGVNPVIIRRLKEFPPVSKLDPSVY…
	FtLOX6c	MFCASGMKRKSANSKLENGMKRTIEGTVVLMKKNVLDVTDLSASFLDRIYEILGKGVTFQLISAVHLDSGLSLQPALTISDGLQGKMGKTAYLEKWVTKLTPLTAGETRFNVTFEWDESMGFPGAIIIKNHHHSQFYLRTVTLEDVPGHGRVHFVCNSWVYPTHRYNYNRIFFANKTYLPQDTPGPLRKLREEELKNLRGNGKGMLKEWDRVYDYAYYNDLGMPNKGSDYARPVLGGSKDYPYPRRGKTGRKPTKKDPQTESRLPLLSLDIYVPRDERFDHLKFSDFLAYGLKALVQVLVPELKAVCDKTPNEFDTFGDVLNLYEGGFKLPKSTINKLQDRIPWELIKELVRTDGEGFLRLPMPDAVKEDQNAWRTDEEFGREMLAGVNPVIIRRLKEF…
	FtLOX7	MFCSSGISKQENGIKKAIKGRVVLMKKNVLDVTDVPASILDKIYELLGKCVSLQLISAVHPDQVDGTRGKTGKPAYLEKWDSKTTSITPREATFDVRFELDESIGFPGAIMVKNHHHTQFYLKTVTLEDVPGHGRIHFVCNSWVYPTRRYKYNRVFFANKTYLPRDTPELLRTYREEELKNLRGNGKGMLKEWDRVYDYAYYNDLGMPDKGKDYVRPVLGGSKEYPYPRRGRTGRKPTKTDPNTESRLPLVSLDIYVPRDERFDQLKFSDFVADGLKAVAQVLVPELDSITDKTPNEFDSLEDVLKLYEGGFKLPSALHKILEHVPLELLKELFHTDGEGLFKLPMPAVIKEDKAAWRTDEEFAREMIAGLNPVIIQCLQEFPPVSKLDPAIYGNQNSI…
	FtLOX8	MADLQKPLKVKAIVKETMTVGGFLKNLGLGQTLDNLSNLFLGTALELELISTQIRQLGKLGSEKEPVKAYARARVRSAAVLSELNNLAEMEYEANFEVPHDFGEIGAIFVQNEHQKEMFLHTIVLEGLPYGQVTITCDSWIHSKFENPEKRIFFTNKSYLPSQTPSGLTLLRKHELEILRGNGKGERESYDRIYDYDTYNDIGNPDSKIELKRPVLGGTKTHPYPRRCRTGRPKSKADPLSESRSSGSNYVPRDEQFADIKEFSFGVNILGAVLDALIPSLEAAIVDTNLGFPDFTAINRLFTNGIDLPKFKNQKEMRLALPSLLQEATNAGKDVLLFKTTDMFERDEFGWFRDEEFARQTLAGLNPYGIKLVTEWPLKSKLDPEIYGPQESAITDEII…
Sorghum bicolor (L) Moench	SbLOX1	MLLGGIIDGLTGANKHARLKGTVVLMRKNVLDLNDLGATVIDGISEFLGKGVTCQLISSTLVDANNGNRGRVGAEANLEQWLTSLPSVTTGESKFGVTFDWEVAKLGVPGAVIVKNNHTSEFFLKTITLDDVPGRGTVTFVANSWVYPVGKYRYSRVFFSNDTYLPSQMPPALKPYRDDELRNLRGDDQQGPYQEHDRVYRYDVYNDLGEPDGGNPRPILGGSADHPYPRRCRTGRKPTKTDPNSESRLSSLLEKIYVPRDERFGHLKMSDFLGHAIKAIAQGIIPAVRTYVDTSPKEFDSFQDIINLYEGGIKLPKIQALEDMRKLFPLQLVKDLLPAGGDYLLKLPIPEIIKESKDAWRTDEEFAREVLAGVNPVVITRLTEFPPKSTLDPSKYGDH…
	SbLOX2	MAAPCRELAGLRRGPAAARPPVPGRRGANELCLAPFHHRAPQQQRQRQRRGRGLKVVAAISEDLPRLAAPGTGTGNKGAAEGRRPEKVLVRAALTVRRKHKEDLKEAMAGHLDALWDMVGRSVALELISTKIHARTKKPLQSGQASIKDWCQKRGVKGEHVVYTAEFMVDSDFGEPGAITVANRHHREFFLESIVVEGGLPCGPVHFACNSWVQSTRELPGKRVFFSNKPYLPSETPPGLRELRDKELKDLRGDGTGVRKLSDRIYDYAMYNDLGNPDRGKEFTRPILGGDKIPYPRRCRTGRPPTDTSMMAESRVEKPHRIYVPRDEAFEELKQGAFSSGRLRAVLHTLIPSMIATISAETHSFQGFHHVDNLYKEGLRLKLGLQEHLFQKIPLVQKI…
	SbLOX3	MIGKIIGDITGSNKHAQLKGNVVLVRKTVLGLDVTSIAGSLLDGVGEFLGRGVTCQLISSTVVDPNNGNRGKVGAEASLEKWLLNPPPLLSGENKFHVTFDWEVEKQGIPGAIIVKNNHASEFFLKTITLDDVPGHGTVVFVANSWIYPQSKYRYNRVFFSNDTYLPSQMPAALKPYRDDELRNLRGDDQQGPYKEHDRVYRYDVYNDLGLPDSGNPRPVLGGNKELPYPRRCRTGRKPTRTDPNSERRLTVVEGDVYVPRDERFGHIKKSDFYGYAIKALVNAVIPAIRTYVDLSPGEFNSFKDIIKLYEGGIQLPKIPVLEDLRKQFPLELVKDVLPVGGDYLLKLPMPQIIKEDKTGWMTDEEFGREILAGVNPMIVRRLTEFPPRSTLDPSKYGD…
	SbLOX4	MFGNIGKIPVISDITGSNKNAHLKGNVVLMRKTVLGFDVTSMAGAVIDGVGEFLGRGVTCQLISSTVVDPYNGNRGKVGAEASLEQWLLQPPPLLSGENKFGVTFDWEVEKHGVPGAIIVKNNHASEFFLKTITLDDVPGHGTVVFVANSWIYPQSKYRYNRVFFSNDTYLPSQMPAALKPYRDDELRNLRGDDQQGPYQEHDRVYRYDVYNDLGNPDGGNPRPVLGGSKDHPYPRRGRTGRKPTLTDPSSESRLTLVDGDVYVPRDERFGHIKNSDFYGYTIKAFADGLVPILQGYFLGLEFNSFKDILQLYEGGIKLPDIPALEEFRKQFPLQMVKDLMPAGGDYVLKLPMPQIIKEDKKAWMSDEEFARETLAGVNPLIIRRLTEFPPKSTLDPSK…
	SbLOX5	MASAMELVGRSFLPGSAAAASPAGRERRRGGPCFAAVGREGSAHKRRPSLRSTAPVGALAERVVVTPAPPEERAGTAPPEPHPQSVAARAVVTVRRRRKEDAKRRVAEQLDAYADRVGRSVLLELISTETDPRKGGPKKSRRSALVGWFEKKDVKAERVVYTADFTVDGCFGEPGAVTVLNRHQREFFIESIVVEGFPSGPAHFTCNSWVQPTRVDRNPRVFFTNKPYLPAETPPGLQELRRQELSDLRGEGGADTTGERRITDRVWEYDVYNDLGNPDKGAEFARPILGGEQQLPYPRRMRTGRPKTFTDDRAESRVEYPEPIYVSRDEEFEEGKNEMLSEGALKALLHNFMPLLVSSVSPDIRDFAGFHDVDNLFKEGLRLKQALQDQLFQKIPFVR…
	SbLOX8	MQMPFCWDKRSPAHAPADNHVAINGTVVVSCHLGLSSPGKTTTLRLFSTTQMDPNTGKGKLSPEAPLRSGKKTKAKQGAVKTTTMTYQVTFFVDADFGTPGAVVVKSGLRNDHFFLRHVQVHMPEAGRTIHFECNSWVYPFKKTNADRVFFINTSYLPDKTPEALRLLRDEELRSLRGSGRGELKDWERVYDYDLYNDLGNPDKEEHARPVLGGITSVYPYPRRCRTGRPLFKTDGATETRKHMINLDFYIPPDERFSPTKLAEVLTLAVQAVTHFVLPESKALFHGNINSFRSLEQLKGDLYRKPVVDGQVVMDKLKTSVPSHKTYKQVSKMVKETPVKFPIPQVIQNEPEAWRSDEEFAREMLAGLNPVVIKRLEVFPPVSRGGKQSSITAAHIERQ…
	SbLOX9	MINLNLKQPLMLPAHQSNVVVGSRLASSPSAAAVSRPRRGGAGVSSSSSRSRSSSRRHTRLPRISCSATEEVSGAVAAVTVEPPQMLTVTATVEASPAIGQMYFERALDDVGDLLGKTLLLELVSSELDAKSGLEKPRVAAFAHKTLREGHYEAEFKLPASFGPVGAVLVENEHHKEIFIREIKLVTGGDTSTAVTFDCNSWVHSKFDNPNKRIFFTLKSYLPSDTPKGLEELRKKDLQALRGDGSGERRLFERVYDYDVYNDLGDPDKHPTHQRPILGGSKRFPYPRRCRTGRPRTKSDPQTEKRDGRHHYVPRDEQFSEVKQLTFGATTLRSGLHALLPAIRPLLQNRKELRFPHFPSIDGLYSDGIPLPAQTGFDAIRSVVPRVVKLVGETTDHVL…
	SbLOXo	MFWHGVADRLTGKNKEAWNEGKIRGTVKLVKKEVLDVGDFNASLLDGVHKILGWDDGVAFQLVSATAADPSDGGRGKVGRAAHLEEAVVSLKSKVDGETVFRVNFDWDESQGIPGAVRVRNLQHAEFFLKTLTLEGVPGRQGGTVVFVANSWIYPHKLYSQERIFFANDTYLPNKMPAALVPYRQDELKILRGDDTPGPYKEHDRVYRYDYYNDLGDPDKGEDNARPILGGSQHPYPRRCRTGRHPTEKDPNSESRLFLLNLNIYVPRDERFGHLKMSDFLGYSLKAIVEAVLPTLGTFVDDTPKEFDSFEDILGLYELGPEAPNNPLVAEVRKRIPSEFLRSILPNGSHDHPLKMPLPNIIKSDVLKKAPEFKFGWRTDEEFARETLAGVNPVIIKRL…
	SbLOXm	MLLHAFADRLTGKNKAAWNEGRIRGTVVLVKKDALDLGHFQASLLDGIHQILGQDTGLTFQLVSATKADHRNGGRGKVGKAAHLEEVVVSLKSRTDGETVFRVNFEWDESQGIPGAVLVRNHQTEEVFLKTLTLEGVPGKGTVVFVANSWVHNHRSYTQDRVFFANDTYLPSKMPAPLVPYRQDELKLLRGDNNHGPYKKHDRVYRYDYYNDLGDPDKSKDDARPVLGGTPDHPYPRRCRTGRAPTKTDPKSESRLNLLQILALDVYVPRDERFGHLKMDDFRGYSLKTVVEAVLPLINTKFDIVGVPEEFDSFEDILRLYELGPEAPNHPILAEIRKKIPSEFLRSLLPVGGHDDPLKMPLPHVIQSDARNKAPQDKYGWRTDEEFARETLAGVNPVV…
Citrullus. lanatus subsp. vulgaris	ClLOX1	MFNIGKNIIEGALNTTGDLAGSVINAGSNIVDQVSNLGGKKIKGKVILMRSNVLDFTEFHSSLLDNFTELLGGGVSLQLISATHASLDSRGKVGKKAFLERWLTSIPPLFAGESVFQVNFTWEDNFGFPGAFFIQNGHTSEFFLKSLTLEDVPGFGKVHFDCNSWVYPSGRYKKDRIFFANNTYLPSETPNPLRKYREEELLTLRGDGSGERKEWDRIYDYDVYNDISEPGDGRPILGGSQYPYPRRGRTGRSRERKDSNYESRLLAISGLNIYVPRDENFGHLKLSDFLGFALKSLASSVQPELVNLINITPGEFDKFQDVHDLYEGGFPVPLDVFRNLTKGFTPPMFQELLRSDGERFLKFPPPQVVKDDKSAWKTDDEFAREMLAGVNPLIIRRLE…
	ClLOX2	MFNIEKNIIEGALNTTGDLAGSVINAGSNIVDQVSNLGGKKIKGKVILMRSNVLDFTEFSSSLLDDFTELLGSGVSFQLISATHASLDSRGKVGKKAFLERWMTSIPPLFAGESVFEVNFTWEDDFGFPGAFFIQNGHTSEFLLKSLTLEDVPGFGNVHFDCNSWVYPSARYQKDRIFFSNNTYLPSETPDPLRKYREEELLNLRGDGTGERKEWDRIYDYDVYNDLADPDGGSNLIRPILGGSEYPYPRRGRTGRPPASKDSKYESRLPSIMGLNIYVPRDENFGHLKMSDFLAFALKSLASSIQPELVNLINITPGEFDKFQDVHDLYEGGFPIPLNVFRNLTQSFTPPMFQELLRTDGERFLKFPTPQVVQEDKSAWRTDEEFAREMLAGVNPLIL…
	ClLOX3	MLIGSIVGAISGLKHGGKKIHGTVVLMRDNVLDFNDFGSTVLDNLHELLGGGVSLRLVSAHHGDPSKDFEGKVGEAAYLENWVGNTIIPIFAGETAFSITFDWDEEIGVPGAFFIRNEHFSEFFLKSLTLEDVPGHGRLHFDCNSWVYPADKYKNDRIFFANQAYLPNETPEPLRKYRADELLNLRGNGKGERKEWDRIYDYDVYNDIGDPDSNLDLGRPILGGSSKYPYPRRGRTGRPPSKKDPKSESRLPGSSKPTDIYVPRDERFGHLKMSDFLAYGLKSISRSIKPKLDDLFDSTPGEFDDFNDVFDLFEKGLPVPRTLLESITDNIPAPLLKEIFRTDGERFLRFPTPQLIHEDKFAWSTDEEFAREMLAGVNPVVIARLQEFPPTSKLDPNIY…
	ClLOX4	MVSKEEKKIRGEVVLMKSNVLDFNDFHASFLDHLYEFVGKRVSLQLVGALNAHPLTFSIVEYILVGMEWFFETYLPSETPEPLREFREDELRSLRGDGNGELQEWDRVYDYALYNDLADPDKGPQYARPVLGGSTNYPYPRRGRTGRPPTKSGKDERFGHLKLSDFLAYALKAVSEFIKPGLEEYFEGTPGEFDILQDVLDLYEGGFPVPEGLFELISENIAAPLLKEIFRTDGERLFKFPMPQVIKEDRSAWRTDEEFGREMLAGVNPVVIRRLQEFPPTSKLDPEVFGDQNSKITEEHIIHNLDGLTVEEAIKKNRLFILDHHDSLMPYLRRINTTSTKTYASRTVLFLKENGTLKPLAIELSLPNPQGDEFGAVSKVFFPAEQGVGSSIWQLAKAY…
	ClLOX5	MLKSQLCSHSGLEAAVFVKPNPFLLSNSKPLLPTRWECGGQRGRQNPKPHHLRLAARPALIKASSVASSTEKTVSVKALVTVKRILGSGLYLERGLDDIADLFGKSLRLELICADLDPVTGLEKGTIKKYAHKEDTDGDEITYEADFEIPPDFGKIGAIFVENEHHKEIYLKDVVIEGLPTGPLHFACSSWVNEKDHHDSKRIFFTTKSYLPSNTPEGLKRYRVEELKALQGDGFGERQVHDRIYDYDVYNDLGDPDHNIEKKRPVLGGKQFPYPRRCRTGRPRCEADPLSETRSSNNYVPRDEAFSPVKFATFGVNTVNSLLNALIPAVESVSTDKDIRFPHFPAIDDLFDNGVPLPPSQGGWKLATLLPRMIDTVVDKAEDILRFHPPETFDKDKFF…
	ClLOX6	MLNCPIHYRSNQALFVYQKPFIVGNVEVLVSLRQGLKPNPSHLRFPNTNVIKAFAMAASIHNPISGKVVVTIKPSINGLFPKFGFKRRLALEFLSIEMDPSTGLEKGTIKSYAEKVEREDNEVIMYETKLVIPEDFGGIGAVLVVNEHNKEMFVKDIVIHGIPTQPHLHFACNSWIQSNDKRVFFTTKLIKIVDPLSEAKSVEFYVPRDEAFSIPTQGYPLTRKLCSMLHGFLPALKDIFTDQTFPLSTKTNHLSLLPRLVESVANKAMDILLLHPSQTSYGDKFFWFRDEEFARHTLAGLNPYSIRLVMEWPLKSKLDPSIYGSPESAITDEIVEQQIKGFMSVDEVRELKGRTLYGSRTLFFLNPDSTLRPLAIELSRPPIDGKPQWRDVFTPCWDT…
	ClLOX7	TGSEKPPIIVQAKLISEDAIEEIYEGSLEVPSDFGEIGAVIVENHNENEMFVKEVDLRGLTSGPLTISCNSWVQPKTLVPTQRRVFFTDKSYLPSQTPAGLKSMREIELVNLQGNGTGERQSYDRIYDYDVYNDLGDPDKSEDLKRPVLGGPDRPYPRRCRTGRPPTQTDPQSEQRATGNIYVPRDETFSDIKQKVFNASTLLSVLQTIIPRLQVHFDQNAGFPNFKAIDALFDVDGFNLPPLESTTSLKELLPWIFKLISETGEFLFRFQSPEPMDRDKFFWLRDEEFARQTLAGQNPYSIQLVKEWPLTSQLDPEIYGPPESAFNTQMINQEIGSMTVQEAIQKKKLFILDYHDMLLPYVQKVRALKGTTLYGSRTLFFLNEDETLRPLAIELTRPP…
	ClLOX8	MGVKMTAVVSVKPKTDEQIPCGEIIILKFASTDLDSYGQQKPLIEGKAKKQNNNDESEVKYVAEIEVPEDFGEIGAVIVELGFYYAKERFIDTVSIQNPRSGKSVTFSCKSWVQPKSLIPDQRRIFFSTKKSYLPGIKTPRGLVKLRAEDLENLRGGNTKDRTGERKAYERIYDYDVYNDLGDPDEEWQWKRPVLGGNEEYPYPRRCRTGRPQCISDSSSEQRSKERFYVPRDEEFSEVKQHYFPPSEPGNKDLLGKDPFTDLPQIESLFREGIQTPPAPPKILQFNVSSIISSPHQSALHSPQVVPSSLLQFPPPESYRRDRYSWLSDTEFARQTLAGLNPYSIQLVKSLPFISELDAKEYGPPKSLFTSQLVETLIGGSITADEAIKQKKLFVLDYH…
	ClLOX9	MAVNIIGIVDVIPKIDEKIPSDDTFFLKLASSDLDSYGQQKPLMGGEAKIIQNESTKEKYKYVAKIDVPKDFGEIGAVIVELKDNSSEKFIDTVIVANPKSYNSITFSCNSWVQPKNLIPNQHRIFFSTKSYLPENTPQGLVKLRAEDLANLRGQKSDGTVDKTERKAFERIYDYDVYNDLGDPDVDMKWKRPVLGGSEQYPYPRRCRTGRPASVLDPRSERRGEESFYVPRDEAFSEVKEKMFPVNSRKKGKLGTKPFDDFTQIDLMFRDGIEIPPAAHEILKFNIITTLSSNQPAPASVEPSTIQPDKAKLIKFPPPETFKRDKFNWLSDSEFARQTLAGLNPYCIQLVKSWPLKSELNPQDYGPPESGFTTQLVQQLIGCSITVDEAIAKKKLFVL…
	ClLOX10	YAVKIEVPKGFGEIGAVIVELKDNSTERFIDTVFIENSTSHNSVTFSCNSWVQPKNLIPDQQRVFFSTKSYLPENTPAGLVKLRAEDLANLRGQKADGTEDKNERKAFERIYDYDVYNDLGDPDVDLKWKRPVLGGSNEYPYPRRCRTGRPASIRGDKFNWLSDSEFARQTLAGLNPYCIQLVKSWPLRSELNPDDYGPPESGFTTELVQKLIGSSITVEEAITQKKLFVLDYHDTLMQYVEKVRSIKRTTLYGSRTLFFLNSDDTLTPLAIELTRPPMAGKPQWKQVFSPSTHATNAWLWRLAKAHVLAHDSCVHQLIIHWLRTHCCMEPYAIALNRQLSTMHPIYRLLHPHFRFNMRINSNAREILINAGGIIESTFSAGAYSMEFSSLVYKKEWQF…
	ClLOX11	MECTNTATVIVKTHKGETKKGDSLPPEDTIFLTFVSETSHSCEKDNVVEGTVTIKKKKPGEDYNTYEGKIEVQDGFGRIGAVIVKISKDNSSTETFIDTVTIQKSMSDNLITFSCKSWVQPKNDDDDDDEYSQRRIFFSTKSYLPDNTPAGLVKLRAEDLRNLRGEKPDGTIDMKERKENERIYDYDVYNDLGETDDVPMSKRHVFGGSKEYPYPRRYDSFETRGSGKFYVPRDEEFSKVKQSYFPDMGQKNNMDELGEDHFTDLREIESLYHGGIKTPTAPHKILHLEISSILSPHQPPVLHSAISLTTILPPAESHISEYTFYINETLKSVKITVHLPHICLLIFPRDRYNWLSDGEFARQTLAGVNPCSIQLVKSLPFESALDIHKYGPKESKFTP…
	ClLOX12	MGICPGVEMLQKLLEAFFSGLLMKFGYGGGGAGERKRIRGTVVIMKKCVLDFKDVKASVLDRVHEFLGKGVTIQLISSNPPQSDRLEATKIGKTANLEKWISTVKPSLTADEMELTVFFEWEERMGEPGGFIIKNHHSTQFYLKTVTLHDVPGYGSVHFVCNSWVYPAHRYTYDRVFFSNKSYLPSETPESLRKYREEELVNLRGSGIGELKEWDRVYDYAYYNDLGMPDSGKKYVRTILGGSKEFPYPRRGRTGRKPAKADPSCECRLPLLSLDIYVPRDERFRNLKLSDFIAYGVKSIVQTLVPEIKSLCDKTINEFDSFQDVLDLYEGGMSLPTEVLGTLRELVPWQLFRELMRSDGHQFLKFPVPDVIKESKTAWRTDEEFGREMLAGVNPVIIR…
	ClLOX13	MSTVQRSVVVTVKPKTKNHFRPDEIISLKFASVVLDSNEEEKEFIKCEAEIQQRESGMDYKYKNKINIPEDFGEIGAVIVELQEDVNERFIDSIFIEKQTPHKLVMFSCKSWVQPRGVIGHRRIFFSTKSYLPGRTPAGLVKLREEDLENLRGKRADGSTTSEIQMFQETGRPHSQNDSSSEQRSRDKFYVPRDEECSEVKELYFNKGRDSKDTNLLGKDSFSNLSQIESMFRDGIEAPSATPNILQLDISSMVSPDQPDYYSSDVLNANNRFPIPESYRRDQYNWLSDSEFARQTLSRSKSLLYTTSQNVWLWRLVKAHVLSHDSCIHQVVIHWLRAHCCMEPYAIATNRQLSTMHPIYRLLHPHFRYTMRINANARATLINAGGIIESTFSTASHSM…
	ClLOX14	MALANEIIGSSFLHKTSLVSQSQLFQSGGLEKQFFKPIWVVPVEKRKVVAQLRKAVNSPVAAISEDLVKAVPLADKPVKNKVRAVVTIRNKNKEDIKETIVKQLDAFTDRIGQNVVLQLISTEIDPKTNAPKKSNEAVLKDWSKKTNLKAERVNYIAEFLLTSDFGEPGAITITNKHQXXXXXXXXXXXXXXXXEFFLETITIEQFASDPIHFPCNSWVQSRKDHPAKRIFFSNKPYLPGETPAGIKKLRENELKEIRGDGKGERKLSDRVYDFDVYNDLGNPDKGIEFARPRLGGEKIPYPRRCRTGRAPTDTDITAESRVEKPLPMYVPRDEQFEESKQTTFSLGRLKAVLHNLIPSLKASILSNKHDFHGFSDIDSLYSEGVLLKLGLQDELLKKL…
	ClLOX15	MAMDRNKQRNSGEDCWMKGVVVIVHDFGKSGPAKSASLQIYSATELDPSTGKGKLSKKAKLEEWRSKKKNDGSRISSYKIKLKVEKWFGIPGAFLITNKHKHKFFLGSAFLQISNHSQIIHFDCNSWVYPINLNASLNIFFSNTSYLPSQTPSPLMELRKLELIKLRGDGTREFEEWENIYDYDYYNNVGNFEEDSRPIMGGSSSLPYPRRGRTVHLSNADSSSETMELETYVPADERICHNKVKELASNSVEAALQFLIPTLKTLNYQPCTIDHFKSFVELHCFFWAQKPSNLAKADKWTKLQLQKFLPQKLFQQILSQKEPFMYPLPQFLRENERAWMDDDEFARQMLAGTNPVRITCLHNFPPESKTKVVSTIKASDIEHNLDGLTLQQAIEDRRI…
	ClLOX16	MFTVSPSNHLNLQKHFESSGRRFFPISGSGSRFRVRKARVSRCGSLVGGSGSTRTVIRSQKNTVEPAASPSKKRGGNESSTISSSSSSGGIDVRAMIRIRKKMKEKLTEKIEDQWEYFVNGIGHGISIRLISEEIDPETNSGRSIESCVKGWLPKPHNGVHALEYAANFTVPRNFGSPGAVLITNLHGKEFYLLEVIVHGFDDGPIFFPANTWIHSRKDNSDSRIIFKNHAYLPSQTPAGLVDLRSKDLSSIRGNGKGERKPYDRIYDYDVYNDLGNPDKSKDLARPVLGFEERPYPRRCRTGRPPTVSDPLTESRIEKPHPVYVPRDETFEEIKQNTFSAGRLKALVHNLVPSIAATLSKSDISFKCFSEIDKLYIDGVVLNDENHQEDSQKFFLGNI…
Musa acuminata	MaLOX1	MLHGFFDAITGKHHEHHEAPKSSTTVKGSVLLMKKNVLDFNDFNASLLDGLHEFLGKGVSFQLVSATVADPHNGNKGKIGPPAYLEEWITTMTSVATGETKFTVHFSWDESQGVPGAIIVKNNHHSAFYLKTITLEGVPNKEHIHFVCNSWVYPVDKYKYDRIFFANNTYLPSKTPEPLKRYREEELVHLRGDDVTGELKEHDRIYNYAYYNDLGNPDKGHDYARPILGGSQEQPYPRRGRTGRHPTKTDPNYESRLPLLSLDIYVPRDERFGHLKMSDFLAYALKSLTQSLLPTLSAVFDTTPMEFDSFKDVLQLYEGGLPIPQSPELDEIRSHLPFEMLKELVRTDGERVLKLPLPQVIQEDRNAWRTDEEFGREMLAGVNPVIISRVQEFPPVSKL…
	MaLOX2	MASHIVGEKVSGSVVLIRKTGLCFNYCGGTVVDNVLGRCISFQLVSATVGDANNGNRGVVGEEAYLEQNITLLPSLAAGETAYHVTFHCEEKNGIPGAVIVKNNLSSEFFLKTLTIEDFRGKGRIHFVCNSWVYPAGKYKYDRVFFANTTYLPGDTPLPLKPYREEELWNLKGNNVAGQLQEWDRVYRYDYYNDLGSPDTCQDLARPILGGTPEHPYPRRGRTGRPPTKTDPKSESRLPLLNLNIYVPRDEQFGHLKMADFLMYALKGVVRVVLPVLQAIAGVIPIEFNSFEDVLKLYEGGLPVPPNPLFEELRQLVPFEMIRELRRVQGGQGLLKLPRPHVIEVDKTAWRTDEEFTREMLAGLNPVVIRRLEEFPPTSKLDACKYGDHTSTITAAHIE…
	MaLOX3	MASHIVGEKVSGTVVLIRKTGLCFNYCGGTVIDNVLGRSISFQLVSATVGDANNGNRGVVGEEAYLEQHITSLPALAAGETAYQVTFHCEEKNGIPGAVIVKNNLSSEFFLKTLTLEDFPGKGRIHFVCNSWVYPAVKYKYDRVFFANTTYLPGDTPLPLKPYREEELCNLKGANVDGQLKEWDRVYRYDYYNDLGSPDTCQDLARPILGGTPEHPYPRRGRTGRPPTKNDLKSESRLPLLNLNIYVPRDEQFGHLKMADFLTYAFKGVVRVVLPVLQAIAGATPIEFNSFEDVLKLYEGGLPVPPNPLLEELRQLVPFEMIRALQRVEGGRGLLKLPMPQVIQVDKTAWRTDEEFTREMLAGLNPVVIRRLEEFPPTSKLDACKYGDHTSTITAAHIE…
	MaLOX4	MTLLGDMLSHIVGGGSHGVKVRGTVVLIRKNVLGFNDFGGTVIDNVLELLGRCISFQLISATVGDPNNGNRGVVGEEAYLEQHITLLPSLAAGETAYHVTFHCEEKNGIPGAVIVKNNLGSEFFLKTLTLEDFPGKGRIHFVCNSWVYPAGKYKYDRVFFANTTYLPGDTPLPLKLYREEELCNLKGDNVAGKLQEWDRVYRYDYYNDLGSPDKSKDLARPILGGTPEHPYPRRGRTGRPPTKTDPKSESRLPQLDLNIYVPRDEHFGHLKMADFLTYALKGVVAGVLPVLQAIADVTPKEFDSFEDVLKLYEGGLPVPHTPLLEELRQRVPFEMIRELLRVEGGQGLLKLPKPQVIQVDKTAWRTDEEFTREMLAGLNPVVIRRLEEFPPTSKLDPCK…
	MaLOX5a	MLQDCWDNLRQKVIHHLNLLAGYETQPVLRGEVVVYRTSGRSNPAKSTAISLYSITRADENTGFGKLSREASLRNGKKTKHDGVETTTYDVVFYLEADFGTPGAIAVKNRGRREFLLKSVTLEVSENRSVHFDCNSWVYPIIKTNVDRLFFANTSYLPSQTPAALQSLRQEELASLRGNGRGERKEWERIYDYDRYNDLGDPDKGLHHERPILGGTRSYPYPRRCRTGRPLSNQDRATETRKKIINLDFYVPPDDRFSPVKLSEFISNSIRAIVHFVIPEVKSVFEGSIRNFESFGQMRKDLYSSHRRSILEGVVMEKLKALVPEEFIKEVVRVVKENPLKFPIPEVIATDENAWMSDEEFGRETLAGLNPAVIRCLERFPPVGRGGKVSSITASHIEK…
	MaLOX5b	MLQDCWDNLRQKVIHHLNLLAGYETQPVLRGEVVVYRTSGRSNPAKSTAISLYSITRADENTGFGKLSREASLRNGKKTKHDGVETTTYDVVFYLEADFGTPGAIAVKNRGRREFLLKSVTLEVSENRSVHFDCNSWVYPIIKTNVDRLFFANTSYLPSQTPAALQSLRQEELASLRGNGRGERKEWERIYDYDRYNDLGDPDKGLHHERPILGGTRSYPYPRRCRTGRPLSNQDRATETRKKIINLDFYVPPDDRFSPVKLSEFISNSIRAIVHFVIPEVKSVFEGSIRNFESFGQMRKDLYSSHRRSILEGVVMEKLKALVPEEFIKEVVRVVKENPLKFPIPEVIATDENAWMSDEEFGRETLAGLNPAVIRCLERFPPVGRGGKVSSITASHIEK…
	MaLOX6	MATSMEILASSLLQRTPLLPSSRSPLLRGGEQSRLFLSPACFPLKKRSSAAGRVVRAPVSAAILTERFVRVETEERPVRFKVRAAVTVRRKKKEDLMATVANQLDAFSDRIGRNVVLELVSAEIDLRTRKPKASNSAALRGWFEKKKAKAERVVYTAEFTVDSSFGEPGAITVLNRHQREFFLESIVVEGFACGPVHFPCNSWVQPTRIHPHKRVFFSNKPYLPSQTPPGLRELRQQELKELRGDGKGERKLTDRIYDYDTYNDLGNPDRGIDFVRPTLGGEQMPYPRRLRTGRPPTITDRHVESRVEDPLPMYVPRDERFEEGKQAMLTAGAQKAVLHNLVPLLVASFSPESHDFKAFHEVDNLFKEGLRLKQTLQDQLFHKIPLVSKIEESTEGHLR…
	MaLOX7	MTNMLKQGLRAPTHVPSLFLSHKPLLSGHGASCVPMVSSSSARRGRASRRRRQICCSAAAEESTPSVVAAAKRPVTVNAVLTVLPTVGGAFAHIGITRGLDDIGDLLGKSLHLELVSAELDPATGLEKKTIAAFAHKASHGVETAKYEASFSVPPSFGEIGAVFVRNEHHKEMYLSDIVLSSADDSIAVNISCKSWLHSKFDNPEDRVFFTNKSYLPSQTPTGLQKLREKELEILRGNGTGQRKKFERIYDYDTYNDLGNPDKNPSTARPVLGGSEALPYPRRCRSGRPRSKKDPQSEQKGDVYVPRDENFSEVKQVTFSAKTLRSVLHALVPSLQTVLVDAKLGFPYFTAIDSLFDEGVPLPKQDAFHVFRTVVPRLVKAVTQGAHSILQFEVPEMLE…
	MaLOX8	MFGNIVGGVVGGVVGGVGDVVGGILGGSKGVQVKGTVVLMPKNVLDFNDLAGNVIDGLFDILGQNVTFQLVSATVGDPNNGNRGVVGSPASLQYLGRLPSLAAGESRFSVTFQWEENKGIPGAVIVKNKHATQFFLKTLTLDNFPGKGRIHFVCNSWVYPASKYKYDRVFFANTTYLPGDTPAPLKPYRQDELLNLRGQDVTGELKEWDRVYDYAYYNDLGSPDQGANLVRPILGGSAEYPYPRRGKTGRAPTKTDPKTESRLPLLNLNIYVPRDERFGHLKMGDFLTYAIKAISTGLLPTLQAIFDITPNEFDSFEEVLSLYENGLPVPQIPLLDELRQRIPFEMIRELLRTEKGQNFLKLPKPHVIQVDKNAWRTDEEFGREMLAGVDPLIVSRLDN…
	MaLOX9	MFGNIVGGVVGGVAGGVGDVVGGILGVSKGVQVKGTVVLMPKNVLDFNDLAGNVIDGLFDILGQNVTFQLVSATVGDPNNGNRGVVGSPASLQYLGRLPSLAAGESRFSVTFQWEENKGIPGAVIVKNKHATQFFLKTLTLDNFPGKGRIHFVCNSWVYPANNYRYDRIFFANTTYLPGATPAPLKPYREDELRHLRGDDVTSELQEWDRVYGYAVYNDLGTPDDANLVRPILGGSAVYPYPRRGKTNRPMTRKDPNTESRLGTLNTLNIYVPRDERFGHVKMGDFLTYGIKAVVNGLLPVLDAIVNVTPFEFDSFEDIMRLYEEGIPVPYVPLFDELRQSIPFEMVKEVLRVEGGQRLLKLPKPQIIKFDKSAWRTDEEFAREMVAGVHPVLIKLLKV…
	MaLOX10	MIGNIVGGVVGGILGGSKGVQVKGTVVLMQKNVLDFNDLAGNVIDGLFELLGQGVTFQLVSATVGDPDNGNRGVVGEAASLQYLGHLPSLAAGESKYSVTFQWQENHGIPGAVIVKNKHATQFFLKTLTLDNFPGKGRIHFVCNSWVYPASKYKYDRVFFANTTYLLADTPEPLKPYRQDELRNLRGQDVTGELKEWDRVYDYAYYNDLGSPDQGANHVRPILGGSAEYPYPRRGKTGRAPTKTDPKTESRLPLLNLNIYVPRDERFGHLKMGDFLTYAIKAISTGLLPTLQAIFDITPNEFDSFEEVLSLYENGLPVPQIPLLDELRQRIPFEMIRELLRTEKGQNFLKLPKPHVIQVDKNAWRTDEEFGREMLAGVDPLIVSRLDNFPPISQLDSDK…
	MaLOX11	MFGNIVGGVVGGVVGGVGDVVGGILGGSKGVQVKGTVVLMPKNVLDFNDLAGNVIDGLFDILGQNVTFQLVSATVGDPNNGNRGVVGSPASLQYLGRLPSLAAGESRFSVTFQWEENKGIPGAVIVKNKHATQFFLKTLTVDNFPGKGRIHFVCNSWVYPANKYRYDRIFFANTTYLPGATPAPLNPYREDELRHLRGDDVTSELQEWDRVYGYAVYNDLGTPDNANLVRPILGGSAVYPYPRRGKTNRPMTRKDPNTESRLGTLDTLNVYVPRDERFGHVKMGDFLTYGIKAIVNGLLPVLDAIVNITPFEFDSFEDIMRLYEEGIPVPYVPLFDELRQSIPFEMVKEVLRVQGGQRLLKLPKPQIIKFDKSAWRTDEEFAREMVAGVHPVLIKLLKV…
	MaLOX12	MLSAKSTSFFPAIAPQLDAGRSSRTRLVNLGSCRRSIASRTVRAVISSDDKSVGTLPSQPAAVGVALRAAAPPGDSIDVRVVLTVRNRIKEKLVSKIGDQLEYFVNGIGQGITVQLVSEEIDPDSESGKRSAEVAVRGFLPRSSNHPSLVEYAANFTVPSGFGRPGAICITNLHRKEFYLVEIVVHGLNDGPFFFPANTWIHTRNDNPQSRIIFSNQAYLPSQTPDGLKNIRQDILLGLRGNGKGERKKFEMIYDYALYNDLGNPDKDPDVARPVLGGSKRPYPRRCRTGRPPTKSDLSAESRVEKPHSVYVPRDETFEEIKQNTFSAGALKALFHNLIPALMAALSSSDSQFECFSDIDRLYKDGLLIKSEEQKLTQKLLLPTVLGNLLSMGEKLMKY…
	MaLOX13	MEMLGSSLLRTTTPLLRSSSSSLFPGDRPSDLLFSHASFPSRQRIGLARRVVRSPVAAVVLTERFVRTEAEEKPVWFKVQAAVTVRRRKQEDLKESIANQVDAFLDKMGKNVVMELVSTEIDPKTRKPKTSNRAALRGWFEKKNTKAERVVYTAEFAVDSSFGEPGAITVLNRHQSEFFLESIVVEGFACGPVHFACNSWVQPTSVHPNNRVFFGNKPYLPSQTPAGLRELRQQELKALKGDGNGERKLTDRIYDYDTYNDLGNPDKGIEFARTTLGGEKMPFPRRLRTGRAPTATDSHAESRVEDPLPMYVPRDERFEEGKQEMLKAGALKAVLHNLVPLLVAFLSPQSHDFKAFHELDNLFKEGLRLKRSLQDQLFHKIPFVTKIEESSEGLLRYDT…
	MaLOX14	MLTPQLNRHASSLLFCHGGSLPSGRGVPHGPAVMVRSKKTSKRSGVRSIRCALKEFRSSQAETDAVLAIKAVATVKVTVGGLLSNLGLPRGIDDVKDLLGKTLLLELVSTELDPKTGREKETVKAYAKKAKQHGDEIEYEASFKVPKDFGDIGGVFVVNEHRKEMFLEEIKLDASDHTATATTLTITCKSWVHSKSDNTDKRLFFVNKSYLPAQTPAGLRRLREEELEVIRGDGQGERKAFERIYDYDLYNDLGDPDHDVSKTRPVLGGSKEFPYPRRCRTGRPRSKKDPESETRSGFVYVPRDEAFSEVKSATFSSRTLRSALRAAIPSIQTAVIDAKLGFPHFNAIDSLFGDGLTLPKRQGVGFFQGLLPRLVNAITGGTQELLLFDSPEMIERDKF…
	MaLOX15	MAASLEIFGSSLLPRTCLLSSSSSPLFGGGEQRNLFFPCKQRRSCTAGRAGRTPVAAVVLTERFARVEAEEKPVRFKVRAAVTVRRKKKEDLKETIANQLDAFSDKIGRNVVLELVSTEFDPRTRKAKTSNMAELKGWFEKKNAKAERVVYTAEFTVDSSFGEPGAIKVLNRHQREFFLESIVVEGFACGPVHFPCNSWVQPTRIHASKRVFFSNKPYLPSQTPSGLRNLRQQELKELRGDGKGQRKLTDRIYDYDVYNDLGNPDKGIEFARPTLGGEKLPYPRRTRTGRAPTSTDKDAETRVEDPQPVYVPRDDQFEEGKQEMLTAGAQKAVLHNLVPMLVAAFSPESHDFKAFHEVDNLFKEGLRLKQSLQDQLFHKIPLVSKIEESSEALLRYDTP…
	MaLOX16	MIRSNILGGSKGMAVKGTVVLMRKNTLDFTDFTASLLDGVQELLGQRVSLQLVSATVGDPKHGNRGVVGDPAYLDGFVSKLPSIAAGESTFDVTFHWQEKNGVPGAVIVKNRHASQFYLKSITLKDFPGKGRIHFVCNSWVYSADKYKYDRVFFANTAYLPGETPAPLKPYREDELLNLRGEDVTGQLQEWDRIYDYAYYNDLGNPDSDAALARPVLGGSSEYPYPRRGRTGRPPTKTDPNSESRLPLISLDIYVPRDERFGHLKMADFLTYALKALVQAVVPVLEAIADETPNEFDSFEDILKLYEGGLPVAKVPLLDELRDRIPFEMIRELFRTEGNQRLLKLPIPQIIEVNKYAWRTDEEFAREMLAGVNPVIIRRLEVFPPVSKLDPSKYGNQNS…
	MaLOX17	MIRSNILGGSKGMAVKGTVVLMRKNTLDFTDFTASLLDGVQELLGQRVSLQLVSATVGDPKHGNRGVVGDPAYLDGFVSKLPSIAAGESTFDVTFHWQEKNGVPGAVIVKNRHASQFYLKSITLKDFPGKGRIHFVCNSWVYSADKYKYDRVFFANTAYLPGETPAPLKPYREDELLNLRGEDVTGQLQEWDRIYDYAYYNDLGNPDSDAALARPVLGGSSEYPYPRRGRTGRPPTKTDPNSESRLPLISLDIYVPRDERFGHLKMADFLTYALKALVQAVVPVLEAIADETPNEFDSFEDILKLYEGGLPVAKVPLLDELRDRIPFEMIRELFRTEGNQRLLKLPIPQIIEVNKYAWRTDEEFAREMLAGVNPVIIRRLEVFPPVSKLDPSKYGNQNS…
	MaLOX18	MAACNEIIGVSPLGRSSFLPGNRSVLLGSKQNKLCFASPALLEQRRKGRLPSMKKAVATPVVATISEEVVKLVVGKQQQKLKVRAALTVRRKLKEDLKEVIVNQLDALSDKIGRNVVLELISTEINPRTKKPNKSGETVIKDWYEKKNVKGERVVYTAEFDVDSAFGEPGAITVVNRHQKEFFLEGVVIEGFACGPVHFPCNSWVQSTKDLPTKRIFFSNKPYLPSETPAGLKELRKKELNEQRGDGNGVRKRSDRIYDYATYNDLGNPDRGIEFARPTLGGKKIPYPRRCRTGRPPTDTNMVAESRIEKPHPIYVPRDEAFEELKQGAFSAGRLRAVLHNFIPSLIASISADNHDFQGFHHIDNLYKEGLVLKLGLQEHLIKKLPFVRKIQESSEGLL…
Populus trichocarpa	PtLOX1	MLKPQVYQQSNPTRALLRFTKQFIPGNDHSSFHLKPRPKAQKHFKTGFKPRSSKAIASLSQDTKIKVKAIVKVKRNVGGLLTSLGIDQGLNDIQDLLGKTILLELISAELHPKSELEKPTIKGYAHRRLSQANEYVKYEAGFEVPLDFGEVGAISVENGYHTEVFLQEIVLNGLPQGNINVTCGSWIHSKYKNNRKRVFFTNKSYVPSQTPSGLRRLRKEEIIILRGNGLGKQQAGDRIYDYDVYNDIGDPDKSSELARPVLGGKKLPYPRRCRTGRPRSEIDPTSEIRKGDFYIPRDEASSEVKQITFYAKTSVSLIQAFVPSIGNAITCADHGFEYFTSIESLYDEELELPPLPNEGLWKTLLPQLFKAINIPNGEDMLRFEMPKTMKRDKFCWLRD…
	PtLOX2	MLKPQVSRQPNSTRTHLLFHKPSIQGSRHASFFLKSTSKFNIEAQKHFRVAFKPSEIKAIASVTEESTDIKVKAVVTVKQTIGGLITSVGIERGLDDIKDLLGKTLLLELVSAELDPKTELEKPTIQAFAHRIGGQVVEGDIRYEADFEVPLNFGEVGAIFVENEHHKEMFLQDIVLDGLPHGAVNITCGSWVHSKYDNDRKRIFFTNKSYLPSQTPSGIRRLREEELVLLRGNGQGQRKAGDRIYDYDVYNDIGNPDKKPELARPVLGGKEHPYPRRCRTGRPRCETDPSSEKRVSAFYVPRDEAFSEVKQLTFSAKTLYSLFHALIPSIGNVIDDANLGFPYMTAIDSLFSEGIEMPPLTKEGFWKEVMPRLFKVIAGGGDVLRFEVPKPMERDKFF…
	PtLOX3	MLKPQLHQSHLSTKIPFLLPKPFIHGSGHASFPVYSRSLSTKANKKVRVGYKHGSIKSIASVTQQSTDVKAVVTVKQTVVDFWTEIGIERGLDDFTDLFGKTLLLELVSAELDPKTGLEKPSIRKYAHKIDHEGEDIKYEADFVVPPDFGEIGAIFVENEHHKEMYLHDVVLDGFPTGPVHVTCDSWIHSKFDNKKKRLFFTNKSYLPSETPNGLTKLRKEELETLRGNDNGERKKGERIYDYDVYNDLGNPDSDPETARPVLGGKEHPYPRRCRTGRPRTESDPLTETRSSSFYVPRDEEFSEVKMGTFSAKTLKSVLHALVPSLSTAIVDSELGFPFFSSIDALFNEGINLPPLKKQGFWKDLLPNLFRAITDGTKDVLKFETPDTMERDRFFWFRD…
	PtLOX4	MLKPQLHQSHLSTKIPFLLPKPFIHGSGHASFPVYSRSLSTKANKKVRVGYKHGSIKSIASVTQQSTDVKAVVTVKQTVVDFWTEIGIERGLDDFTDLFGKTLLLELVSAELDPKTGLEKPSIRKYAHKIDHEGEDIKYEADFVVPPDFGEIGAIFVENEHHKEMYLHDVVLDGFPTGPVHVTCDSWIHSKFDNKKKRLFFTNKSYLPSETPNGLTKLRKEELETLRGNDNGERKKGERIYDYDVYNDLGNPDSDPETARPVLGGKEHPYPRRCRTGRPRTESDPLTETRSSSFYVPRDEEFSEVKMGTFSAKTLKSVLHALVPSLSTAIVDSELGFPFFSSIDALFNEGINLPPLKKQGFWKDLLPNLFRAITDGTKDVLKFETPDTMERDRFFWFRD…
	PtLOX5	MALATEIIGGRLIDGSSFLPTSKMLTNQRVGMVKRNQFLGSPVLVPSQQIRRQEQLKRAVRAPVAAISEDIIKTNNKTTVPEKAVNFKVRAVVTVRNKHKEDLKATIVKQLDSFTDKIGRNVVLELISTDVDPKSKEPKRSKPAALRDWSKKSNLKAERVHYTAEFTVDSNFGVPGAITVSNKHQQEFFMESITIEGFACGPVHFPCNSWIQSKKDHPGKRILFSNKPYLPSETPAGLRALREKELRDLRGDGKGVRKLSDRIYDFDVYNDLGNPDKSVNLTRPSLGGKKIPFPRRCRTGRLPMDSDITAESRVEKPLPLYVPRDEQFEESKKNTFSAGRLKSVLHNIIPSLKATISAENHDFSGFSDIDILYKEGLLLKVGLQDEIWKNLPLPKVVTK…
	PtLOX6	MALTKEIMGGRLIDGPSFVTTSRMFMNQRLGMVKKNQFLVRPVLVPLQQIRRQEQVRRVVKGPPVAVISEDIIKANNNTSLPVKAVKFKVRALVTVRNKHKEDLKETIVKQLDALTDNIIGRNVVLELISTEVDPKSKEPKRSKKAALRDWSKKSNIKAERVHYTAELTVDSDFGVPGAITVSNKHQQEFFLETITIDGFACGPVHFPCNSWVQSKKDHPAERIFFSNKPYLPSETPAGLKALRDKELSNLRGDGKGVRKMSDRIYDFDVYNDLGNPDKGNHLVRPRLGGKAIPYPRRCRTGRLPMDSDINAESRVEKPTPLYVPRDEQFEESKQITFSNGRLRAVLHTLIPAIKASISADNQDFSSFSDIGVLYKEGLLLKVGLQDEIWKNLPLLKAV…
	PtLOX7	MLHSIIDAITGDHSNGTKKMVKKIKGTVVLMKKNVLDFNDFNASVLDRVHEFLGQGVSLQLVSAVNSDPSENDLKGKLGEPAYLEEWITTITSLTAGESAFKVTFDWDEEIGVPGAFLIRNNHHSEFYLKTVTLEDVPGQGRVHFVCNSWIYPTRRYNYDRVFFTNQNYLPHETPAPLRKYREEELVKLRGDGKGELKEWDRVYDYAYYNDLGDPDKGAKYARPVLGGSSEYPYPRRGRTGRAPAKSDPNTESRLPLLMSLNIYVPRDERFGHLKLADFLAYALKSVAQFIKPELEALRDSTPNEFDSFADVLDLYEGGFKLPDGPLLENLKKNIPVEMLKEIIRTDGEGLFRFPKPQVIQESNSAWRTDEEFGREMLSGVNPVLIRRLEEFPPKSKLD…
	PtLOX8	MFQNIVNAIASCCAGDSKMKIKGTVVLMKKNVLEFNDFHASVLDRGHELFGQGVSLQVISAAKSDPPENDLKGKLGEPAYLEEWITTITSLTAGESAFKVTFDWDEEIGVPGAFLIRNKHHSEFYLKTVTLEDVPGQGRVHFVCNSWIYPTKCYNYDRVFFTNQNYLPHETPAPLRKYREEELVKLRGDGKGELKEWDRVYDYAYYNDLGDPDKGAKYVRPVLGGSSEYPYPRRGRTGRAPAKSDPNTESRLPLLMSLNIYVPRDERFGHLKLADFLAYALKSVAQFIKPELEALRDSTPNEFDSFAAVLDLYEGGFKLPDGPLLENLKKNIPVEMLKEIIRTDGEGLFRFPKPQVIQESNSAWRTDEEFGREMLSGVNPVIIRRLEEFPPKSKLDSKL…
	PtLOX9	MLHSIIDAITGDHSNGTKKMVKKIKGTVVLMKKNVLDFNDFNASVLDRVHEFLGQRVSLQLVSAVNSDPSENDLKGKLGEPAYLEEWITTITSLTAGESAFKVTFDWDEEIGVPGAFLIRNNHHSEFYLKTVTLEDVPGQGRVHFVCNSWIYPTTRYNYDRVFFTNQNYLPHETPAPLRKYREEELVKLRGDGKGELKEWDRVYDYAYYNDLGDPDKGAKYARPVLGGSSEYPYPRRGRTGRAPAKSDPNTESRQPLLMSLNIYVPRDERFGHLKMSDFLAYALKSVAQFIRPELEALCDSTPNEFDSFDDVLDLYEGGFKLPDGPLLENLTKNIPVEMLKEIIPTDGEGLFRFPKPQVIQESNSAWRTDEEFGREMLSGVNPVIIRRLEEFPPKSKLD…
	PtLOX10	MFQNIVNAIASCCAGDSKMKIKGTVVLMKKNVLEFNDFHASVLDRGHELLGQGVSLQVIGTAKSDPPENGLKEKLGKPANLENWITTIDPLIAGETEFKVTFDWDEEIGIPVALLIRNNHHSEFYLKTVTLEDVPGQGRVHFVCNSWIYPAKRYNYDRVFFTNKTHLPQDAPAPLRKYREEELVKLRGDGKGELKEWDRVYDYAYYNDLGDPDEGAKYVRPVLGGSSEYPYPRRGRTGRAATESDPNSESRLPILTSLNIYVPRDERFGHLRMADFLGYALKLVAQVVKPGLEGLFDSTPNEFDSFDDVFKLYEGGIELPHGPLVDNIREKIPLQMLKEIFRTDGENLFEFPMPQVIEGNKTGWRTDEEFGREMLAGLNPVVIRRLEEFPPKSKLDSKQ…
	PtLOX11	MGFCPVSEMMQKVMEMFYTQPKTKAEGNEVEGRRKIKGTVVLMKKNVLDFNDIKASFLDRVHELLGKGVSMQLVSAVHQDPDGLRGKLGKVAYLEKWVTTITPLTAGETMFTITFEWDESMGFPGAIIIKNHHHSQLYLKTVTLEDIPGHGRVHFICNSWVYPTHRYKYDRAFFSNKAYLPCQTPEPLRLYREEELINLRGNGKGELKEWDRVYDYDYYNDLGSPDKGEGYARPILGGTEEHPYPRRGRTGRRKTKNDPHCEQRLPLISLDIYVPRDERFGHLKFSDFLAYALKSLGQVLLPEITSLCDKTINEFDTFEDVLNLYEGGIKLPNGPTISKIRDHIPWEMLKELVRNDGERLLKFPKPDVIKADKSAWRTDEEFAREMLAGVNPVIISRLQ…
	PtLOX12	MYAMKRVYSPFKSELTFRLSPATSRAWKDGFFWKTRVPSGSKVSCTPGSIRAVISSDDKALEPSSKEASNKEVDEIVLSSSSDKLGKGGIDVRAVITIRKKIKEKINEKIEDQWEYFVNGIGKGILIQLVSEEIDPETNSGKSVQASVRGWIPKPSNNEHIIEYAADFTVPFDFGNPGAVLVTNLHGKEFYLMEIVVHGFDAGPIFFPANTWIHSSKDNPDSRIIFRNRAYLPSRTPPGIKDLRREDLLSLRGNGKGERKPHDRIYDYALYNDLGNPDKDDELARPVLGGEKWPYPRRCRTGRPPTKKDPKCETRIEKPHPVYVPRDETFEEIKRNTFSTGRLKALLHNLIPAIAATLSSSDIPFTCFSDIDKLYNDGFILKTEELSEIVQNPFLGNFM…
	PtLOX13	MISSQIQKLNSTKPLSSLLPKPSILSHGNPSLPIYKQQYLPKRQANFRIRAALGNAKVLSKPSTTETAVKVKATVTVKVTIGGIFSNIGLTVPLDELTEVFGKSFLLELVSSQLDPNTGLEKETIKAYAHKASQKDDEVKYETKFTVPAGFGAVGAVLVENQHHKEIFLKDIVLEGFPNGPVNVECDSWAHSKYDDSKKRIFFANKSYITSETPDGLKRLREQELEDIRGNGEGERKSHERIYDYDTYNDLGFPDISSKLARPVLGGKERPYPRRCRTGRPRTRKDPSSESKSLINYVPRDEVFSEVKQITFSAKTLKSVLNALLPSIESVFEDPKLGFPYFNAIDSLFDEGVTLPKPKNTGFLRTVLPRLVKTFREGGDELLLFDTPDMIDRDKFSWF…
	PtLOX14	MYAVKQVYSPFKPELTFRRSTAASRTWKHGFFWQTWVPSGSKVICTPGSIRAVISNDDKALEQPNKETDNKEVNGTVLSSTSDKLGRGGIDVRAVITIRKKMKEKINEKIEDQWEYFINGIGRGISIQLVSEEIDPETNSGKSVRAFVRGWLPKPSNNEHIFEYAADFTVPFDFGNPGAILVSNLHGKEVYLMEIVVHGFDEGPIFFPANTWIHSCKDNPDDRIIFRNQAYLPSQTPPGIKDLRREDLLSLRGNGKGKRKPHDRIYDYALYNDLGNPDKDEELARPALGCEKWPYPRRCRTGRSPTKKDPNCETRVEKPHPVYVPRDETFEEIKQNTFSTGRLKALLHNLIPAISATLSSSDIPFTCFSDIDKLYNDGFVLKSDELNEIAQNPFLGNLM…
	PtLOX15	MGFCPVSEMFHKVMETFCMQPKTKAKGNEVEGRRKIKGTVVLMKKNVLDFHDIKASFLDRVHELLGKGVSMQLVSAVHQDPADSLRGKLGKVADVEKWVTTRTPLTAGETIFTITFEWDENMGLPGAIIIKNHHHSQLYLKTVTLEDVPGHGRVLFICNSWVYPSHRYKYNRVFFSNKAYLPCQTPEPLRLYREEELLNLRGHGKGELKEWDRVYDYDYYNDLGNPDKGEEYARPILGGTEEYPYPRRGRTGRRKTKTDPHTEKRLPLLSLDIYVPRDERFGHLKFSDFLAYALKSLVQILLPEIKSLCDKTINEFDTFEDVLNLYEGGIKLPNKPTLHKIRDHVPWEMLRELVRNDGERFLKFPKPDVIKADKSAWRTDEEFAREMLAGVNPVIISRL…
	PtLOX16	MFQNIIDAITGDSDGSKKLKCGDGECKKIKGTVVLMKKNVLGFNDFHASVLDRVHELLGQRVSLQLISAVNSDRSDNDLKGKLGEPAYLEEWVTTVTPLTAGEAAFKVTFDWDEEIGVPGAFLIRNNHLSEFYLKTVTLEGVPGHGRVHFVCNSWIYHAKRYNKDRVFFTNQTFMPHETPAPLRKYREEELVHLRGNGEGELKEWDRVYDYAYYNDLGDPDKGPKYVRPVLGGSSEYPYPRRGRTGRAATESDPNTESRQPLLMSLNIYVPRDERFGHLKMADFLAYALKSIAQFVKPELEALCDSTPNEFDSFDDVLKLYEGGFELPEGPLLDNLRKNIPLEMLKEIFRTDGENLFKFPKPQVIQDNHSAWRTDEEFGREMLAGVNPVIIRRLEKFPP…
	PtLOX17	MFQNIIDAITDCCTGDCKKKIRGTVVLMKKNVLDLTDLNASIHDRVHEFLGQGVSLQLVSAVNSDPSANDFKGKLGKPAYLEKWITTVTPLTAGETAFKVTFNWDEEIGIPGALLVKNNHQSEFYLKTVTLEGVPGLGRVHFVCKSWIYPAKHYSKPRIFFTNKTYLPDKTPAPLRKYREEELFLLRGNGEGELKEWDRVYDYDFYNDLGSSKKGSEYFRPVLGGSSEYPYPRRGRTGRKKEDPNTESRLPLLKSLSIYVPRDERFGHLKLADFLAYALKTVAQVVKNGVDTFVDTTPNEFDSFDDVLKLYEGGYELPHVPLLDNIRKIFPLEFLEEIFRTDGERFFEFPKPQVIKDNHSAWRTDEEFGREMLAGVNPVLIRRLEEFPPKSKLNRELYG…
	PtLOX18	MVFPRSYPSMQERVRDVQSKFQNHHIKQNIIKGKIVIQNHGQSGPGKSAYVQIYSSTTVDPSTGKGKLSAKAYLKHGKSEGHGGTKTRVYKIKIHVEPDFGIPGAFLMKNQHKHKFFLESVTLEILDNQIIYFDCRSWVYPFQKTKSERLFFSNNSYLPNHTPSALVELRKLELASLRGDGKQVRKEWDRIYDYDYYNDLCNPDKGQEHIRPVLGGSELHPYPRRVRTGHPPSNTEPSTESRTETINLDIYVPLDERFSPKKLSEFISNSIQATVHFIITEADSLFKQDSSSFESFDEIHDMFSSKRSNAVEGKAKDKLKGKVKERLKKLVPDVLFKEITYAGKEDLVKFPLPQIIRENELAWGNDEEFGRQMLAGTNPTRIQSLQEFPPEGRYGVSTI…
	PtLOX19	MVFPRAYPSMQERVREVQSKFQNHHIKQNIIKGKIVIQNHGQSGPGKSASVQIYSSTTVDPSTGKGKLSAKAYLKRGKSEGHDGTKTRIYKIKIHVEPDFGIPGAFLMKNQHKHKFFLESVTLEIPDNQIIYFDCRSWVYPFQKTKSERLFFSNNSYLPNHTPSALVELRKLELVSLRGDGKQVRKEWDRIYDYDYYNDLCNPDKGQEHIRPVLGGSELHPYPRRVRTGHPPSNTEPSTESRTETINLDIYVPPDERFSPKKLSEFISNSIQATVHFIITEADSLFKQDSSSFESFDEIHDMFSSKRSKAVEGKAKDKLKGKVKERLKKLVPDVLFKEITYAGKEDLAKFPLPQIIRENELAWGNDEEFGRQMLAGTNPARIQSLQKFPPEGRYGMSTI…
	PtLOX20	MLKPQLHQSHLSTKIPFLLPKPFIHGSGHASFPVYSRSLSTKANKEVRVGHKHGSIKSIASVTQQSTDVKAVVTVKQTVVDFWTEIGIERGLDDLKDLFGKTLLLELVSAELDSKTGLEKPSIRKYAHKIDHEGEDIKYEADFVVPPDFGEIGAIFVENEHHKEMYLHDVVFDGFPTGPVHVTCDSWIHSKFDNKKKRLFFTNKSYLPSETPNGLTKLREEELETLRGNDNGERKNGERIYDYDVYNDLGNPDSDPETARPVLGGKEHPYPRRCRTGRPRTESDPLTETRSSSFYVPRDEEFSEIKMGTFSAKTLKSVLHALVPSLSTAIVDSELGFPFFSSIDALFNEGINLPPLKKQGFWKDLLPNLFRAITDGTKDVLKFETPDTMERDRFFWFRD…
