# Supplementary material for: Genome-wide identification and expression pattern analysis of lipoxygenase gene family in turnip (Brassica rapa L. subsp. rapa)
Source: PeerJ. 2022 Jul 22;10:e13746. doi: 10.7717/peerj.13746 (PMC9310782; doi:10.7717/peerj.13746)
Supplement: Supplemental Information 6 [file peerj-10-13746-s006.xlsx]

## Sheet: Sheet1
Table S5. Interspecies and intraspecies co-linear gene pairs
gene name	gene name	Duplication type
BrrLOX7	BrrLOX8	Tandem duplication
BrrLOX9	BrrLOX10	Tandem duplication
BrrLOX9	BrrLOX11	Tandem duplication
BrrLOX9	BrrLOX12	Tandem duplication
BrrLOX10	BrrLOX11	Tandem duplication
BrrLOX10	BrrLOX12	Tandem duplication
BrrLOX11	BrrLOX12	Tandem duplication
BrrLOX2	BrrLOX6	Segmental duplication
BrrLOX4	BrrLOX13	Segmental duplication
BrrLOX5	BrrLOX14	Segmental duplication
BrrLOX14	BrrLOX15	Segmental duplication
BrrLOX1	RsLOX1	Segmental duplication
BrrLOX2	RsLOX2	Segmental duplication
BrrLOX2	RsLOX5	Segmental duplication
BrrLOX5	RsLOX4	Segmental duplication
BrrLOX4	RaLOX3	Segmental duplication
BrrLOX4	RsLOX10	Segmental duplication
BrrLOX5	RsLOX11	Segmental duplication
BrrLOX6	RsLOX2	Segmental duplication
BrrLOX6	RsLOX5	Segmental duplication
BrrLOX13	RaLOX3	Segmental duplication
BrrLOX7	RsLOX6	Segmental duplication
BrrLOX9	RsLOX7	Segmental duplication
BrrLOX13	RsLOX10	Segmental duplication
BrrLOX14	RsLOX4	Segmental duplication
BrrLOX14	RsLOX11	Segmental duplication
BrrLOX15	RsLOX4	Segmental duplication
BrrLOX15	RsLOX11	Segmental duplication
BrrLOX1	AtLOX1	Segmental duplication
BrrLOX2	AtLOX5	Segmental duplication
BrrLOX4	AtLOX4	Segmental duplication
BrrLOX5	AtLOX6	Segmental duplication
BrrLOX5	AtLOX3	Segmental duplication
BrrLOX6	AtLOX5	Segmental duplication
BrrLOX13	AtLOX4	Segmental duplication
BrrLOX14	AtLOX3	Segmental duplication
BrrLOX14	AtLOX6	Segmental duplication
BrrLOX15	AtLOX3	Segmental duplication
BrrLOX15	AtLOX6	Segmental duplication
