# Supplementary material for: Genome-wide identification and expression pattern analysis of lipoxygenase gene family in turnip (Brassica rapa L. subsp. rapa)
Source: PeerJ. 2022 Jul 22;10:e13746. doi: 10.7717/peerj.13746 (PMC9310782; doi:10.7717/peerj.13746)
Supplement: Supplemental Information 7 [file peerj-10-13746-s007.xlsx]

## Sheet: Sheet1
Table_S6.TPM values of RNA-seq data in different tissues of turnip
gene name	ES	CSS	RTS
BrrLOX1	151.41	148.669	42.9163
BrrLOX2	10.8394	1.17493	0.602615
BrrLOX3	0.0442241	0.283708	0.151423
BrrLOX4	8.36223	7.77514	6.6218
BrrLOX5	0.75073	1.53947	0.150544
BrrLOX6	10.2096	4.30425	1.30325
BrrLOX7	1.03258	2.4554	3.71478
BrrLOX8	1.03258	2.4554	3.67747
BrrLOX9	6.94429	74.2968	102.406
BrrLOX10	4.25947	26.8952	114.402
BrrLOX11	33.4185	15.5298	24.393
BrrLOX12	3.35746	9.30624	18.71
BrrLOX13	63.5999	74.8304	123.852
BrrLOX14	1.39527	0.112643	0.019099
BrrLOX15	0.0216554	0.145179	0.019099
