# Supplementary material for: Genome-wide identification and expression pattern analysis of lipoxygenase gene family in turnip (Brassica rapa L. subsp. rapa)
Source: PeerJ. 2022 Jul 22;10:e13746. doi: 10.7717/peerj.13746 (PMC9310782; doi:10.7717/peerj.13746)
Supplement: Supplemental Information 8 [file peerj-10-13746-s008.xlsx]

## Sheet: Duress 
BrrLOX1	actin CT	gene CT		BrrLOX2	actin CT	gene CT		BrrLOX3	actin CT	gene CT		BrrLOX4	actin CT	gene CT		BrrLOX5	actin CT	gene CT
0h	19.7958	24.9335		0h	19.7958	27.9781		0h	19.7958	27.6864		0h	19.7958	26.7036		0h	19.7958	28.7026
0h	19.775	25.1084		0h	19.775	27.9815		0h	19.775	27.6873		0h	19.775	26.7308		0h	19.775	28.7162
0h	19.7883	25.1426		0h	19.7883	28.0935		0h	19.7883	27.7002		0h	19.7883	26.9225		0h	19.7883	28.7599
NaCl4h	19.9087	26.0476		NaCl4h	19.9087	28.3093		NaCl4h	19.9087	30.8691		NaCl4h	19.9087	28.3262		NaCl4h	19.9087	29.6562
NaCl4h	19.9723	26.067		NaCl4h	19.9723	28.4156		NaCl4h	19.9723	30.6146		NaCl4h	19.9723	28.5175		NaCl4h	19.9723	29.6932
NaCl4h	20.0923	26.0382		NaCl4h	20.0923	28.5748		NaCl4h	20.0923	30.6857		NaCl4h	20.0923	28.5496		NaCl4h	20.0923	29.6999
NaCl8h	19.954	26.6628		NaCl8h	19.954	29.4243		NaCl8h	19.954	29.5091		NaCl8h	19.954	28.8365		NaCl8h	19.954	30.1948
NaCl8h	20.193	26.77		NaCl8h	20.193	29.4909		NaCl8h	20.193	29.7807		NaCl8h	20.193	28.3569		NaCl8h	20.193	30.2006
NaCl8h	20.4462	26.9228		NaCl8h	20.4462	29.5195		NaCl8h	20.4462	29.9114		NaCl8h	20.4462	28.5069		NaCl8h	20.4462	30.286
NaCl12h	19.3813	27.3246		NaCl12h	19.3813	29.201		NaCl12h	19.3813	28.2355		NaCl12h	19.3813	28.851		NaCl12h	19.3813	30.2334
NaCl12h	19.433	27.1404		NaCl12h	19.433	29.2294		NaCl12h	19.433	28.3423		NaCl12h	19.433	28.902		NaCl12h	19.433	30.2366
NaCl12h	19.5105	27.2086		NaCl12h	19.5105	29.4073		NaCl12h	19.5105	28.4933		NaCl12h	19.5105	28.5293		NaCl12h	19.5105	30.3301
NaCl24h	19.8986	28.3927		NaCl24h	19.8986	28.9406		NaCl24h	19.8986	30.1164		NaCl24h	19.8986	28.6611		NaCl24h	19.8986	30.978
NaCl24h	19.9431	28.4629		NaCl24h	19.9431	28.9058		NaCl24h	19.9431	30.173		NaCl24h	19.9431	28.8137		NaCl24h	19.9431	30.1169
NaCl24h	19.9465	28.5022		NaCl24h	19.9465	28.9154		NaCl24h	19.9465	30.2525		NaCl24h	19.9465	28.8895		NaCl24h	19.9465	30.1714
Drought4h	21.7064	25.8509		Drought4h	21.7064	26.904		Drought4h	21.7064	27.2988		Drought4h	21.7064	26.6414		Drought4h	21.7064	28.5676
Drought4h	21.7132	25.926		Drought4h	21.7132	26.9081		Drought4h	21.7132	27.3073		Drought4h	21.7132	26.6528		Drought4h	21.7132	28.5746
Drought4h	21.7233	25.9608		Drought4h	21.7233	26.9323		Drought4h	21.7233	27.3114		Drought4h	21.7233	26.6538		Drought4h	21.7233	28.5758
Drought8h	21.224	25.5405		Drought8h	21.224	29.331		Drought8h	21.224	30.0049		Drought8h	21.224	26.1349		Drought8h	21.224	29.943
Drought8h	21.2244	25.5443		Drought8h	21.2244	29.3436		Drought8h	21.2244	30.7968		Drought8h	21.2244	26.1702		Drought8h	21.2244	29.9864
Drought8h	21.2357	25.5585		Drought8h	21.2357	29.3473		Drought8h	21.2357	30.9768		Drought8h	21.2357	26.1966		Drought8h	21.2357	31.1007
Drought12h	20.4855	24.7389		Drought12h	20.4855	27.5314		Drought12h	20.4855	21.9807		Drought12h	20.4855	23.3227		Drought12h	20.4855	24.8838
Drought12h	20.4885	24.7552		Drought12h	20.4885	27.5315		Drought12h	20.4885	22.9434		Drought12h	20.4885	23.3308		Drought12h	20.4885	24.8864
Drought12h	20.4984	24.7652		Drought12h	20.4984	27.5315		Drought12h	20.4984	23.0664		Drought12h	20.4984	23.3399		Drought12h	20.4984	24.8923
Drought24h	20.4901	24.9243		Drought24h	20.4901	28.5941		Drought24h	20.4901	31.1562		Drought24h	20.4901	24.8092		Drought24h	20.4901	28.6211
Drought24h	20.5083	24.9334		Drought24h	20.5083	28.5992		Drought24h	20.5083	31.1585		Drought24h	20.5083	24.8142		Drought24h	20.5083	28.6233
Drought24h	20.5122	24.9453		Drought24h	20.5122	28.6038		Drought24h	20.5122	31.1599		Drought24h	20.5122	24.8175		Drought24h	20.5122	28.6294
Heat4h	22.9226	27.9198		Heat4h	22.9226	29.9522		Heat4h	22.9226	29.5083		Heat4h	22.9226	28.9412		Heat4h	22.9226	27.1818
Heat4h	22.9254	27.9351		Heat4h	22.9254	29.9569		Heat4h	22.9254	29.9207		Heat4h	22.9254	28.9801		Heat4h	22.9254	27.1824
Heat4h	22.9282	27.9371		Heat4h	22.9282	30.0334		Heat4h	22.9282	30.761		Heat4h	22.9282	29.0143		Heat4h	22.9282	27.1886
Heat8h	21.7125	27.1492		Heat8h	21.7125	28.3849		Heat8h	21.7125	31.6114		Heat8h	21.7125	27.9959		Heat8h	21.7125	27.7749
Heat8h	21.7753	27.1505		Heat8h	21.7753	28.3905		Heat8h	21.7753	31.6165		Heat8h	21.7753	28.0205		Heat8h	21.7753	27.778
Heat8h	21.7762	27.1509		Heat8h	21.7762	28.3985		Heat8h	21.7762	31.6928		Heat8h	21.7762	28.0211		Heat8h	21.7762	27.7955
Heat12h	21.6041	27.772		Heat12h	21.6041	28.8721		Heat12h	21.6041	30.3197		Heat12h	21.6041	28.0699		Heat12h	21.6041	26.3801
Heat12h	21.6254	27.773		Heat12h	21.6254	28.911		Heat12h	21.6254	30.791		Heat12h	21.6254	28.0781		Heat12h	21.6254	26.3817
Heat12h	21.6363	27.7879		Heat12h	21.6363	28.9766		Heat12h	21.6363	30.8092		Heat12h	21.6363	28.0882		Heat12h	21.6363	26.0834
Heat24h	21.4498	27.4153		Heat24h	21.4498	29.2116		Heat24h	21.4498	32.0906		Heat24h	21.4498	28.529		Heat24h	21.4498	28.52
Heat24h	21.4513	27.4164		Heat24h	21.4513	29.2218		Heat24h	21.4513	32.5697		Heat24h	21.4513	28.5368		Heat24h	21.4513	28.5214
Heat24h	21.4539	27.4256		Heat24h	21.4539	29.2243		Heat24h	21.4539	32.8181		Heat24h	21.4539	28.5392		Heat24h	21.4539	28.5331
Cold4h	19.9812	29.6327		Cold4h	19.9812	19.736		Cold4h	19.9812	20.3504		Cold4h	19.9812	30.7337		Cold4h	19.9812	19.9831
Cold4h	19.9826	29.6363		Cold4h	19.9826	19.7517		Cold4h	19.9826	20.3505		Cold4h	19.9826	30.7423		Cold4h	19.9826	20.1564
Cold4h	19.9899	29.6933		Cold4h	19.9899	19.7983		Cold4h	19.9899	20.3653		Cold4h	19.9899	30.794		Cold4h	19.9899	20.2176
Cold8h	21.8364	31.0109		Cold8h	21.8364	22.1269		Cold8h	21.8364	22.9803		Cold8h	21.8364	33.2125		Cold8h	21.8364	22.9231
Cold8h	21.837	31.1485		Cold8h	21.837	22.6484		Cold8h	21.837	23.1565		Cold8h	21.837	33.2719		Cold8h	21.837	22.9334
Cold8h	21.8376	31.4447		Cold8h	21.8376	23.2994		Cold8h	21.8376	23.1926		Cold8h	21.8376	33.3405		Cold8h	21.8376	22.9523
Cold12h	20.9336	29.3892		Cold12h	20.9336	20.3626		Cold12h	20.9336	20.8413		Cold12h	20.9336	31.5573		Cold12h	20.9336	20.4021
Cold12h	20.9344	29.3973		Cold12h	20.9344	20.3763		Cold12h	20.9344	20.8513		Cold12h	20.9344	31.5636		Cold12h	20.9344	20.4028
Cold12h	20.959	29.4032		Cold12h	20.959	20.3824		Cold12h	20.959	20.8921		Cold12h	20.959	31.5719		Cold12h	20.959	20.4152
Cold24h	20.9751	29.0869		Cold24h	20.9751	19.7485		Cold24h	20.9751	20.9014		Cold24h	20.9751	32.2751		Cold24h	20.9751	20.6255
Cold24h	20.9791	29.1363		Cold24h	20.9791	19.9527		Cold24h	20.9791	20.9159		Cold24h	20.9791	32.2757		Cold24h	20.9791	20.6256
Cold24h	20.9818	29.1979		Cold24h	20.9818	19.9552		Cold24h	20.9818	20.9312		Cold24h	20.9818	32.2767		Cold24h	20.9818	20.6374
BrrLOX6	actin CT	gene CT		BrrLOX7	actin CT	gene CT		BrrLOX8	actin CT	gene CT		BrrLOX9	actin CT	gene CT		BrrLOX10	actin CT	gene CT
0h	19.7958	28.4108		0h	19.7958	20.5414		0h	19.7958	20.1235		0h	19.7958	31.1661		0h	19.7958	20.0938
0h	19.775	28.4618		0h	19.775	20.5524		0h	19.775	20.1249		0h	19.775	31.1739		0h	19.775	20.106
0h	19.7883	28.4718		0h	19.7883	20.5684		0h	19.7883	20.1295		0h	19.7883	31.1787		0h	19.7883	20.1185
NaCl4h	19.9087	29.0714		NaCl4h	19.9087	19.9105		NaCl4h	19.9087	19.2891		NaCl4h	19.9087	32.5769		NaCl4h	19.9087	21.1869
NaCl4h	19.9723	29.0717		NaCl4h	19.9723	19.9203		NaCl4h	19.9723	19.3303		NaCl4h	19.9723	32.6825		NaCl4h	19.9723	21.1924
NaCl4h	20.0923	29.0382		NaCl4h	20.0923	19.9246		NaCl4h	20.0923	19.346		NaCl4h	20.0923	32.6932		NaCl4h	20.0923	21.2015
NaCl8h	19.954	29.8774		NaCl8h	19.954	20.5936		NaCl8h	19.954	19.9281		NaCl8h	19.954	32.8428		NaCl8h	19.954	20.8035
NaCl8h	20.193	29.9393		NaCl8h	20.193	20.5971		NaCl8h	20.193	19.9681		NaCl8h	20.193	32.9186		NaCl8h	20.193	20.8816
NaCl8h	20.4462	29.9948		NaCl8h	20.4462	20.5423		NaCl8h	20.4462	19.9824		NaCl8h	20.4462	32.9456		NaCl8h	20.4462	20.6948
NaCl12h	19.3813	29.9475		NaCl12h	19.3813	20.3036		NaCl12h	19.3813	19.8304		NaCl12h	19.3813	31.9828		NaCl12h	19.3813	18.896
NaCl12h	19.433	29.9109		NaCl12h	19.433	20.3198		NaCl12h	19.433	19.8994		NaCl12h	19.433	31.0732		NaCl12h	19.433	19.0713
NaCl12h	19.5105	29.9069		NaCl12h	19.5105	20.3077		NaCl12h	19.5105	19.9066		NaCl12h	19.5105	31.2405		NaCl12h	19.5105	19.4854
NaCl24h	19.8986	29.715		NaCl24h	19.8986	21.1267		NaCl24h	19.8986	21.5		NaCl24h	19.8986	33.886		NaCl24h	19.8986	21.403
NaCl24h	19.9431	29.7624		NaCl24h	19.9431	21.3181		NaCl24h	19.9431	21.6312		NaCl24h	19.9431	33.2096		NaCl24h	19.9431	21.6239
NaCl24h	19.9465	29.8467		NaCl24h	19.9465	21.3572		NaCl24h	19.9465	21.7084		NaCl24h	19.9465	33.3096		NaCl24h	19.9465	21.8056
Drought4h	21.7064	28.8276		Drought4h	21.7064	19.6517		Drought4h	21.7064	20.2537		Drought4h	21.7064	30.458		Drought4h	21.7064	19.5897
Drought4h	21.7132	28.8439		Drought4h	21.7132	19.6527		Drought4h	21.7132	20.2678		Drought4h	21.7132	30.46		Drought4h	21.7132	19.5898
Drought4h	21.7233	28.8473		Drought4h	21.7233	19.6641		Drought4h	21.7233	20.269		Drought4h	21.7233	30.4663		Drought4h	21.7233	19.5935
Drought8h	21.224	31.119		Drought8h	21.224	21.4701		Drought8h	21.224	22.186		Drought8h	21.224	29.8503		Drought8h	21.224	21.4753
Drought8h	21.2244	31.1191		Drought8h	21.2244	21.4839		Drought8h	21.2244	22.1901		Drought8h	21.2244	29.8598		Drought8h	21.2244	21.4755
Drought8h	21.2357	31.5816		Drought8h	21.2357	21.4909		Drought8h	21.2357	22.1903		Drought8h	21.2357	29.889		Drought8h	21.2357	21.4823
Drought12h	20.4855	28.8442		Drought12h	20.4855	17.8887		Drought12h	20.4855	18.283		Drought12h	20.4855	24.0145		Drought12h	20.4855	17.2811
Drought12h	20.4885	28.8484		Drought12h	20.4885	17.8977		Drought12h	20.4885	18.2872		Drought12h	20.4885	24.0999		Drought12h	20.4885	17.2962
Drought12h	20.4984	28.8501		Drought12h	20.4984	17.8993		Drought12h	20.4984	18.2879		Drought12h	20.4984	24.0543		Drought12h	20.4984	17.2981
Drought24h	20.4901	29.863		Drought24h	20.4901	18.3295		Drought24h	20.4901	18.906		Drought24h	20.4901	25.1943		Drought24h	20.4901	18.048
Drought24h	20.5083	29.8689		Drought24h	20.5083	18.3342		Drought24h	20.5083	18.9962		Drought24h	20.5083	25.1038		Drought24h	20.5083	18.1316
Drought24h	20.5122	29.8757		Drought24h	20.5122	18.3458		Drought24h	20.5122	19.035		Drought24h	20.5122	25.0117		Drought24h	20.5122	18.1479
Heat4h	22.9226	30.3651		Heat4h	22.9226	22.2456		Heat4h	22.9226	22.6338		Heat4h	22.9226	29.9307		Heat4h	22.9226	22.2519
Heat4h	22.9254	30.3716		Heat4h	22.9254	22.2528		Heat4h	22.9254	22.6718		Heat4h	22.9254	29.9314		Heat4h	22.9254	22.2616
Heat4h	22.9282	30.3787		Heat4h	22.9282	22.2552		Heat4h	22.9282	22.6794		Heat4h	22.9282	29.9354		Heat4h	22.9282	22.2681
Heat8h	21.7125	29.2541		Heat8h	21.7125	25.643		Heat8h	21.7125	25.477		Heat8h	21.7125	32.444		Heat8h	21.7125	24.6903
Heat8h	21.7753	29.2599		Heat8h	21.7753	25.672		Heat8h	21.7753	25.4779		Heat8h	21.7753	32.447		Heat8h	21.7753	24.6926
Heat8h	21.7762	29.2688		Heat8h	21.7762	25.6772		Heat8h	21.7762	25.4832		Heat8h	21.7762	32.4531		Heat8h	21.7762	24.7083
Heat12h	21.6041	28.9126		Heat12h	21.6041	23.9327		Heat12h	21.6041	24.0011		Heat12h	21.6041	31.8238		Heat12h	21.6041	23.7714
Heat12h	21.6254	29.0249		Heat12h	21.6254	24.0417		Heat12h	21.6254	24.0655		Heat12h	21.6254	31.834		Heat12h	21.6254	23.7764
Heat12h	21.6363	29.0946		Heat12h	21.6363	24.0969		Heat12h	21.6363	24.0841		Heat12h	21.6363	31.8379		Heat12h	21.6363	23.7894
Heat24h	21.4498	30.9331		Heat24h	21.4498	28.2384		Heat24h	21.4498	28.1966		Heat24h	21.4498	32.9704		Heat24h	21.4498	27.467
Heat24h	21.4513	30.9447		Heat24h	21.4513	28.2421		Heat24h	21.4513	28.2903		Heat24h	21.4513	33.0666		Heat24h	21.4513	27.4721
Heat24h	21.4539	30.9488		Heat24h	21.4539	28.2506		Heat24h	21.4539	28.2921		Heat24h	21.4539	33.0942		Heat24h	21.4539	27.4763
Cold4h	19.9812	25.707		Cold4h	19.9812	28.4233		Cold4h	19.9812	26.1551		Cold4h	19.9812	24.9802		Cold4h	19.9812	23.9669
Cold4h	19.9826	25.7132		Cold4h	19.9826	28.4281		Cold4h	19.9826	27.1539		Cold4h	19.9826	24.9961		Cold4h	19.9826	23.9978
Cold4h	19.9899	25.7995		Cold4h	19.9899	29.4252		Cold4h	19.9899	27.1691		Cold4h	19.9899	25.9817		Cold4h	19.9899	24.06
Cold8h	21.8364	26.2632		Cold8h	21.8364	28.7233		Cold8h	21.8364	28.8706		Cold8h	21.8364	27.343		Cold8h	21.8364	24.9671
Cold8h	21.837	26.275		Cold8h	21.837	28.9575		Cold8h	21.837	28.9751		Cold8h	21.837	27.4589		Cold8h	21.837	25.0526
Cold8h	21.8376	26.2783		Cold8h	21.8376	28.9815		Cold8h	21.8376	29.0148		Cold8h	21.8376	27.9376		Cold8h	21.8376	25.3171
Cold12h	20.9336	25.4645		Cold12h	20.9336	26.9386		Cold12h	20.9336	27.2144		Cold12h	20.9336	26.1914		Cold12h	20.9336	24.8716
Cold12h	20.9344	25.4732		Cold12h	20.9344	27.0361		Cold12h	20.9344	27.2273		Cold12h	20.9344	26.1946		Cold12h	20.9344	24.8754
Cold12h	20.959	25.4737		Cold12h	20.959	27.0797		Cold12h	20.959	27.2339		Cold12h	20.959	26.207		Cold12h	20.959	24.8881
Cold24h	20.9751	25.3888		Cold24h	20.9751	27.6295		Cold24h	20.9751	28.8232		Cold24h	20.9751	26.8822		Cold24h	20.9751	23.4901
Cold24h	20.9791	25.3895		Cold24h	20.9791	27.6304		Cold24h	20.9791	28.8545		Cold24h	20.9791	26.9227		Cold24h	20.9791	23.4952
Cold24h	20.9818	25.3968		Cold24h	20.9818	27.6364		Cold24h	20.9818	28.8793		Cold24h	20.9818	26.9256		Cold24h	20.9818	23.5199
BrrLOX11	actin CT	gene CT		BrrLOX12	actin CT	gene CT		BrrLOX13	actin CT	gene CT		BrrLOX14	actin CT	gene CT		BrrLOX15	actin CT	gene CT
0h	19.7958	28.0536		0h	19.7958	29.1449		0h	19.7958	26.4136		0h	19.7958	28.5831		0h	19.7958	29.1132
0h	19.775	28.1068		0h	19.775	29.1458		0h	19.775	26.42		0h	19.775	28.5959		0h	19.775	29.171
0h	19.7883	28.1363		0h	19.7883	29.1512		0h	19.7883	26.4738		0h	19.7883	28.5964		0h	19.7883	29.1756
NaCl4h	19.9087	29.3768		NaCl4h	19.9087	30.5492		NaCl4h	19.9087	28.5863		NaCl4h	19.9087	29.4171		NaCl4h	19.9087	29.6103
NaCl4h	19.9723	29.3949		NaCl4h	19.9723	30.707		NaCl4h	19.9723	28.858		NaCl4h	19.9723	29.6412		NaCl4h	19.9723	29.6189
NaCl4h	20.0923	29.4069		NaCl4h	20.0923	30.0217		NaCl4h	20.0923	28.1027		NaCl4h	20.0923	29.7993		NaCl4h	20.0923	29.7695
NaCl8h	19.954	29.7714		NaCl8h	19.954	30.8297		NaCl8h	19.954	28.2915		NaCl8h	19.954	29.6505		NaCl8h	19.954	29.1276
NaCl8h	20.193	29.863		NaCl8h	20.193	30.8908		NaCl8h	20.193	28.4002		NaCl8h	20.193	29.947		NaCl8h	20.193	29.9724
NaCl8h	20.4462	29.1175		NaCl8h	20.4462	30.6534		NaCl8h	20.4462	28.917		NaCl8h	20.4462	29.9493		NaCl8h	20.4462	29.9987
NaCl12h	19.3813	29.3874		NaCl12h	19.3813	29.0778		NaCl12h	19.3813	28.3406		NaCl12h	19.3813	28.4335		NaCl12h	19.3813	30.9485
NaCl12h	19.433	29.7056		NaCl12h	19.433	29.1199		NaCl12h	19.433	28.7455		NaCl12h	19.433	28.5651		NaCl12h	19.433	30.0002
NaCl12h	19.5105	28.7811		NaCl12h	19.5105	29.2048		NaCl12h	19.5105	28.825		NaCl12h	19.5105	28.5904		NaCl12h	19.5105	30.1647
NaCl24h	19.8986	29.1141		NaCl24h	19.8986	29.7103		NaCl24h	19.8986	28.7881		NaCl24h	19.8986	28.7955		NaCl24h	19.8986	29.5402
NaCl24h	19.9431	29.3909		NaCl24h	19.9431	30.8615		NaCl24h	19.9431	28.8158		NaCl24h	19.9431	28.8518		NaCl24h	19.9431	29.811
NaCl24h	19.9465	29.4452		NaCl24h	19.9465	30.9239		NaCl24h	19.9465	28.9193		NaCl24h	19.9465	28.9423		NaCl24h	19.9465	29.8465
Drought4h	21.7064	27.9175		Drought4h	21.7064	28.7621		Drought4h	21.7064	28.1887		Drought4h	21.7064	28.0126		Drought4h	21.7064	28.9582
Drought4h	21.7132	27.9178		Drought4h	21.7132	28.7652		Drought4h	21.7132	28.2411		Drought4h	21.7132	28.1171		Drought4h	21.7132	29.0164
Drought4h	21.7233	28.0183		Drought4h	21.7233	28.7661		Drought4h	21.7233	28.2517		Drought4h	21.7233	28.2424		Drought4h	21.7233	29.0234
Drought8h	21.224	27.5233		Drought8h	21.224	29.5418		Drought8h	21.224	31.8147		Drought8h	21.224	27.6655		Drought8h	21.224	28.3347
Drought8h	21.2244	27.5371		Drought8h	21.2244	29.549		Drought8h	21.2244	31.8166		Drought8h	21.2244	27.6796		Drought8h	21.2244	28.3364
Drought8h	21.2357	27.5378		Drought8h	21.2357	29.5813		Drought8h	21.2357	31.8221		Drought8h	21.2357	27.6888		Drought8h	21.2357	28.3409
Drought12h	20.4855	24.4882		Drought12h	20.4855	22.9043		Drought12h	20.4855	25.5393		Drought12h	20.4855	25.8449		Drought12h	20.4855	27.2187
Drought12h	20.4885	24.4913		Drought12h	20.4885	22.7073		Drought12h	20.4885	25.5412		Drought12h	20.4885	25.8517		Drought12h	20.4885	27.2219
Drought12h	20.4984	24.4936		Drought12h	20.4984	22.7187		Drought12h	20.4984	25.552		Drought12h	20.4984	25.8556		Drought12h	20.4984	27.2255
Drought24h	20.4901	25.6425		Drought24h	20.4901	23.1637		Drought24h	20.4901	30.5		Drought24h	20.4901	26.726		Drought24h	20.4901	27.9082
Drought24h	20.5083	25.6532		Drought24h	20.5083	23.1649		Drought24h	20.5083	30.5163		Drought24h	20.5083	26.7347		Drought24h	20.5083	27.998
Drought24h	20.5122	25.6571		Drought24h	20.5122	23.1669		Drought24h	20.5122	30.5317		Drought24h	20.5122	26.7424		Drought24h	20.5122	28.0015
Heat4h	22.9226	29.7215		Heat4h	22.9226	29.6542		Heat4h	22.9226	30.0604		Heat4h	22.9226	30.3966		Heat4h	22.9226	26.4599
Heat4h	22.9254	29.7265		Heat4h	22.9254	30.0008		Heat4h	22.9254	30.3911		Heat4h	22.9254	30.4602		Heat4h	22.9254	26.4606
Heat4h	22.9282	29.7315		Heat4h	22.9282	30.0371		Heat4h	22.9282	30.4057		Heat4h	22.9282	30.4793		Heat4h	22.9282	26.466
Heat8h	21.7125	28.9358		Heat8h	21.7125	30.4073		Heat8h	21.7125	26.1504		Heat8h	21.7125	31.555		Heat8h	21.7125	29.9013
Heat8h	21.7753	28.9363		Heat8h	21.7753	30.4178		Heat8h	21.7753	26.1587		Heat8h	21.7753	31.5628		Heat8h	21.7753	29.9279
Heat8h	21.7762	28.9408		Heat8h	21.7762	30.4234		Heat8h	21.7762	26.1636		Heat8h	21.7762	31.5695		Heat8h	21.7762	29.9291
Heat12h	21.6041	29.2133		Heat12h	21.6041	32.5082		Heat12h	21.6041	27.9382		Heat12h	21.6041	29.8736		Heat12h	21.6041	30.9266
Heat12h	21.6254	29.2254		Heat12h	21.6254	32.5137		Heat12h	21.6254	27.9388		Heat12h	21.6254	30.359		Heat12h	21.6254	31.0427
Heat12h	21.6363	29.2301		Heat12h	21.6363	32.5295		Heat12h	21.6363	27.9428		Heat12h	21.6363	30.4741		Heat12h	21.6363	31.2597
Heat24h	21.4498	29.5155		Heat24h	21.4498	35.6029		Heat24h	21.4498	30.0076		Heat24h	21.4498	32.2224		Heat24h	21.4498	30.7883
Heat24h	21.4513	29.5597		Heat24h	21.4513	35.6073		Heat24h	21.4513	30.0193		Heat24h	21.4513	32.2241		Heat24h	21.4513	30.7941
Heat24h	21.4539	29.5651		Heat24h	21.4539	35.6144		Heat24h	21.4539	30.0205		Heat24h	21.4539	32.2307		Heat24h	21.4539	30.7958
Cold4h	19.9812	26.3647		Cold4h	19.9812	31.2538		Cold4h	19.9812	27.7175		Cold4h	19.9812	21.7197		Cold4h	19.9812	22.1804
Cold4h	19.9826	26.4427		Cold4h	19.9826	31.7772		Cold4h	19.9826	27.7538		Cold4h	19.9826	21.7257		Cold4h	19.9826	22.1837
Cold4h	19.9899	26.5414		Cold4h	19.9899	31.8735		Cold4h	19.9899	27.8262		Cold4h	19.9899	21.7287		Cold4h	19.9899	22.1851
Cold8h	21.8364	28.9102		Cold8h	21.8364	25.2121		Cold8h	21.8364	29.0667		Cold8h	21.8364	23.5575		Cold8h	21.8364	23.2679
Cold8h	21.837	28.9129		Cold8h	21.837	25.3606		Cold8h	21.837	29.4469		Cold8h	21.837	23.6079		Cold8h	21.837	23.4951
Cold8h	21.8376	28.9192		Cold8h	21.8376	25.6229		Cold8h	21.8376	29.4815		Cold8h	21.8376	23.705		Cold8h	21.8376	23.6354
Cold12h	20.9336	26.8743		Cold12h	20.9336	34.5147		Cold12h	20.9336	28.0251		Cold12h	20.9336	22.9199		Cold12h	20.9336	22.9229
Cold12h	20.9344	26.8762		Cold12h	20.9344	34.5169		Cold12h	20.9344	28.0874		Cold12h	20.9344	22.9407		Cold12h	20.9344	22.9402
Cold12h	20.959	26.8847		Cold12h	20.959	34.5658		Cold12h	20.959	28.0912		Cold12h	20.959	22.9477		Cold12h	20.959	22.9489
Cold24h	20.9751	27.3912		Cold24h	20.9751	32.1427		Cold24h	20.9751	28.2817		Cold24h	20.9751	23.9306		Cold24h	20.9751	23.9104
Cold24h	20.9791	27.397		Cold24h	20.9791	32.15		Cold24h	20.9791	28.2862		Cold24h	20.9791	24.0113		Cold24h	20.9791	24.0395
Cold24h	20.9818	27.405		Cold24h	20.9818	32.1523		Cold24h	20.9818	28.2916		Cold24h	20.9818	24.0435		Cold24h	20.9818	24.1404

## Sheet: Hormone
BrrLOX1	actin CT	gene CT		BrrLOX2	actin CT	gene CT		BrrLOX3	actin CT	gene CT		BrrLOX4	actin CT	gene CT		BrrLOX5	actin CT	gene CT
0h	20.677	25.5173		0h	20.677	28.8327		0h	20.677	27.5746		0h	20.677	26.7294		0h	20.677	25.3916
0h	20.92	25.6698		0h	20.92	28.8736		0h	20.92	27.9483		0h	20.92	26.9553		0h	20.92	25.4589
0h	20.9566	25.7781		0h	20.9566	28.9264		0h	20.9566	27.7813		0h	20.9566	26.9558		0h	20.9566	25.516
MeJA4h	19.9389	25.5108		MeJA4h	19.9389	27.8044		MeJA4h	19.9389	27.5046		MeJA4h	19.9389	25.324		MeJA4h	19.9389	25.2999
MeJA4h	20.0657	25.5708		MeJA4h	20.0657	27.9388		MeJA4h	20.0657	27.5159		MeJA4h	20.0657	25.502		MeJA4h	20.0657	25.309
MeJA4h	20.5055	25.7677		MeJA4h	20.5055	27.9474		MeJA4h	20.5055	27.5596		MeJA4h	20.5055	25.5139		MeJA4h	20.5055	25.3122
MeJA8h	19.2318	24.7742		MeJA8h	19.2318	28.1006		MeJA8h	19.2318	20.9676		MeJA8h	19.2318	24.8169		MeJA8h	19.2318	24.7785
MeJA8h	19.2498	25.0901		MeJA8h	19.2498	28.33		MeJA8h	19.2498	21.0142		MeJA8h	19.2498	24.8411		MeJA8h	19.2498	24.7789
MeJA8h	19.4522	25.409		MeJA8h	19.4522	28.6105		MeJA8h	19.4522	21.1337		MeJA8h	19.4522	24.8578		MeJA8h	19.4522	24.9033
MeJA12h	19.9866	25.659		MeJA12h	19.9866	28.9815		MeJA12h	19.9866	28.2516		MeJA12h	19.9866	24.5196		MeJA12h	19.9866	25.9342
MeJA12h	20.1903	25.6886		MeJA12h	20.1903	29.1499		MeJA12h	20.1903	28.3273		MeJA12h	20.1903	24.6915		MeJA12h	20.1903	26.0838
MeJA12h	20.9217	25.7298		MeJA12h	20.9217	29.2816		MeJA12h	20.9217	28.4116		MeJA12h	20.9217	24.7979		MeJA12h	20.9217	26.1467
MeJA24h	19.4591	24.3389		MeJA24h	19.4591	28.7601		MeJA24h	19.4591	25.59		MeJA24h	19.4591	22.0794		MeJA24h	19.4591	23.6729
MeJA24h	19.4641	24.3712		MeJA24h	19.4641	28.7785		MeJA24h	19.4641	25.6606		MeJA24h	19.4641	22.1271		MeJA24h	19.4641	23.6973
MeJA24h	19.7003	24.8936		MeJA24h	19.7003	28.9426		MeJA24h	19.7003	25.6742		MeJA24h	19.7003	22.2013		MeJA24h	19.7003	23.6999
SA4h	18.9158	23.7893		SA4h	18.9158	26.476		SA4h	18.9158	25.5009		SA4h	18.9158	24.3397		SA4h	18.9158	26.1353
SA4h	19.4441	23.9339		SA4h	19.4441	26.9156		SA4h	19.4441	25.7319		SA4h	19.4441	24.6788		SA4h	19.4441	26.3353
SA4h	19.763	23.9578		SA4h	19.763	26.9391		SA4h	19.763	25.894		SA4h	19.763	24.8425		SA4h	19.763	26.6493
SA8h	19.6039	24.7488		SA8h	19.6039	27.8846		SA8h	19.6039	23.2485		SA8h	19.6039	23.0714		SA8h	19.6039	25.5887
SA8h	19.8781	24.9873		SA8h	19.8781	27.8888		SA8h	19.8781	23.2499		SA8h	19.8781	23.0799		SA8h	19.8781	25.5933
SA8h	19.9231	25.0064		SA8h	19.9231	27.8951		SA8h	19.9231	23.2564		SA8h	19.9231	23.0843		SA8h	19.9231	25.5938
SA12h	18.9665	22.646		SA12h	18.9665	27.9119		SA12h	18.9665	24.9842		SA12h	18.9665	24.4311		SA12h	18.9665	24.6654
SA12h	19.1018	22.6496		SA12h	19.1018	27.9859		SA12h	19.1018	24.9901		SA12h	19.1018	24.4415		SA12h	19.1018	24.6665
SA12h	19.1089	22.6573		SA12h	19.1089	27.992		SA12h	19.1089	24.9941		SA12h	19.1089	24.4447		SA12h	19.1089	24.6706
SA24h	20.3771	23.7323		SA24h	20.3771	29.5269		SA24h	20.3771	26.6943		SA24h	20.3771	23.9724		SA24h	20.3771	27.2301
SA24h	20.3813	23.8296		SA24h	20.3813	29.5338		SA24h	20.3813	26.7015		SA24h	20.3813	23.9735		SA24h	20.3813	27.2481
SA24h	20.3869	23.844		SA24h	20.3869	29.5385		SA24h	20.3869	27.7078		SA24h	20.3869	23.9891		SA24h	20.3869	27.249
ABA4h	20.2962	24.2231		ABA4h	20.2962	28.53		ABA4h	20.2962	24.4836		ABA4h	20.2962	24.8627		ABA4h	20.2962	27.0197
ABA4h	20.2964	24.2293		ABA4h	20.2964	28.5307		ABA4h	20.2964	24.4842		ABA4h	20.2964	24.8673		ABA4h	20.2964	27.0206
ABA4h	20.3019	24.2344		ABA4h	20.3019	28.5352		ABA4h	20.3019	24.4985		ABA4h	20.3019	24.877		ABA4h	20.3019	27.0289
ABA8h	20.297	25.0168		ABA8h	20.297	29.7543		ABA8h	20.297	27.2718		ABA8h	20.297	22.3759		ABA8h	20.297	26.959
ABA8h	20.3088	25.0177		ABA8h	20.3088	29.7587		ABA8h	20.3088	27.2745		ABA8h	20.3088	23.3655		ABA8h	20.3088	27.0151
ABA8h	20.314	25.0389		ABA8h	20.314	29.7668		ABA8h	20.314	27.2777		ABA8h	20.314	23.3737		ABA8h	20.314	27.0243
ABA12h	19.6475	23.6744		ABA12h	19.6475	28.1533		ABA12h	19.6475	28.0021		ABA12h	19.6475	22.9234		ABA12h	19.6475	25.4649
ABA12h	19.6542	23.6778		ABA12h	19.6542	28.1579		ABA12h	19.6542	28.0743		ABA12h	19.6542	22.9548		ABA12h	19.6542	25.4691
ABA12h	19.6581	23.6883		ABA12h	19.6581	28.6259		ABA12h	19.6581	28.4565		ABA12h	19.6581	23.1554		ABA12h	19.6581	25.9161
ABA24h	20.9258	24.2915		ABA24h	20.9258	28.749		ABA24h	20.9258	26.9314		ABA24h	20.9258	23.9107		ABA24h	20.9258	27.1199
ABA24h	20.9606	24.409		ABA24h	20.9606	28.8916		ABA24h	20.9606	26.9999		ABA24h	20.9606	23.9631		ABA24h	20.9606	27.162
ABA24h	20.9932	24.4094		ABA24h	20.9932	28.9377		ABA24h	20.9932	27.1231		ABA24h	20.9932	23.9967		ABA24h	20.9932	27.2128
BrrLOX6	actin CT	gene CT		BrrLOX7	actin CT	gene CT		BrrLOX8	actin CT	gene CT		BrrLOX9	actin CT	gene CT		BrrLOX10	actin CT	gene CT
0h	20.677	29.3201		0h	20.677	19.3343		0h	20.677	20.1671		0h	20.677	33.4085		0h	20.677	20.8051
0h	20.92	29.3804		0h	20.92	19.5099		0h	20.92	20.3874		0h	20.92	33.5707		0h	20.92	20.832
0h	20.9566	29.4378		0h	20.9566	19.5644		0h	20.9566	20.4951		0h	20.9566	33.5991		0h	20.9566	20.8779
MeJA4h	19.9389	28.6889		MeJA4h	19.9389	18.3321		MeJA4h	19.9389	18.7093		MeJA4h	19.9389	24.2254		MeJA4h	19.9389	18.2547
MeJA4h	20.0657	28.6973		MeJA4h	20.0657	18.3407		MeJA4h	20.0657	18.7921		MeJA4h	20.0657	24.3138		MeJA4h	20.0657	18.327
MeJA4h	20.5055	28.7059		MeJA4h	20.5055	18.3491		MeJA4h	20.5055	18.8197		MeJA4h	20.5055	24.3369		MeJA4h	20.5055	18.6273
MeJA8h	19.2318	27.7685		MeJA8h	19.2318	17.444		MeJA8h	19.2318	17.3888		MeJA8h	19.2318	24.9739		MeJA8h	19.2318	17.1982
MeJA8h	19.2498	27.9195		MeJA8h	19.2498	17.4914		MeJA8h	19.2498	17.4382		MeJA8h	19.2498	25.1176		MeJA8h	19.2498	17.3126
MeJA8h	19.4522	28.0546		MeJA8h	19.4522	17.561		MeJA8h	19.4522	17.519		MeJA8h	19.4522	25.4579		MeJA8h	19.4522	17.3965
MeJA12h	19.9866	29.7753		MeJA12h	19.9866	18.6163		MeJA12h	19.9866	18.5701		MeJA12h	19.9866	26.2025		MeJA12h	19.9866	18.2918
MeJA12h	20.1903	29.7955		MeJA12h	20.1903	18.8074		MeJA12h	20.1903	18.6394		MeJA12h	20.1903	26.5861		MeJA12h	20.1903	18.5317
MeJA12h	20.9217	29.7985		MeJA12h	20.9217	19.0525		MeJA12h	20.9217	18.8304		MeJA12h	20.9217	26.6443		MeJA12h	20.9217	18.7236
MeJA24h	19.4591	29.0557		MeJA24h	19.4591	17.1246		MeJA24h	19.4591	17.4144		MeJA24h	19.4591	23.3701		MeJA24h	19.4591	16.9071
MeJA24h	19.4641	29.2051		MeJA24h	19.4641	17.1663		MeJA24h	19.4641	17.5161		MeJA24h	19.4641	23.4246		MeJA24h	19.4641	16.9337
MeJA24h	19.7003	29.3312		MeJA24h	19.7003	17.168		MeJA24h	19.7003	17.6685		MeJA24h	19.7003	23.5318		MeJA24h	19.7003	17.0863
SA4h	18.9158	27.8792		SA4h	18.9158	16.5769		SA4h	18.9158	18.0617		SA4h	18.9158	25.4144		SA4h	18.9158	17.7118
SA4h	19.4441	27.9705		SA4h	19.4441	16.6404		SA4h	19.4441	18.2687		SA4h	19.4441	25.4145		SA4h	19.4441	17.9442
SA4h	19.763	27.9727		SA4h	19.763	16.674		SA4h	19.763	18.3731		SA4h	19.763	25.922		SA4h	19.763	18.0133
SA8h	19.6039	28.0244		SA8h	19.6039	16.7027		SA8h	19.6039	18.5921		SA8h	19.6039	23.9214		SA8h	19.6039	17.8513
SA8h	19.8781	28.0645		SA8h	19.8781	16.705		SA8h	19.8781	18.6025		SA8h	19.8781	23.9308		SA8h	19.8781	17.8639
SA8h	19.9231	28.0931		SA8h	19.9231	16.717		SA8h	19.9231	18.6064		SA8h	19.9231	23.8358		SA8h	19.9231	17.865
SA12h	18.9665	27.9918		SA12h	18.9665	16.209		SA12h	18.9665	17.9969		SA12h	18.9665	23.8525		SA12h	18.9665	17.6557
SA12h	19.1018	28.0351		SA12h	19.1018	16.2106		SA12h	19.1018	18.0247		SA12h	19.1018	23.8864		SA12h	19.1018	17.6583
SA12h	19.1089	28.0544		SA12h	19.1089	16.2223		SA12h	19.1089	18.0538		SA12h	19.1089	23.9713		SA12h	19.1089	17.6681
SA24h	20.3771	30.192		SA24h	20.3771	16.5789		SA24h	20.3771	18.6419		SA24h	20.3771	24.2032		SA24h	20.3771	17.6208
SA24h	20.3813	30.1943		SA24h	20.3813	16.5849		SA24h	20.3813	18.6479		SA24h	20.3813	24.204		SA24h	20.3813	17.6365
SA24h	20.3869	30.2047		SA24h	20.3869	16.5862		SA24h	20.3869	18.6494		SA24h	20.3869	24.2196		SA24h	20.3869	17.6399
ABA4h	20.2962	28.7706		ABA4h	20.2962	16.4742		ABA4h	20.2962	18.668		ABA4h	20.2962	25.8072		ABA4h	20.2962	18.2929
ABA4h	20.2964	28.7736		ABA4h	20.2964	16.4791		ABA4h	20.2964	18.6691		ABA4h	20.2964	25.8142		ABA4h	20.2964	18.3011
ABA4h	20.3019	28.7833		ABA4h	20.3019	16.4835		ABA4h	20.3019	18.6796		ABA4h	20.3019	25.817		ABA4h	20.3019	18.3103
ABA8h	20.297	29.7152		ABA8h	20.297	16.4042		ABA8h	20.297	18.2309		ABA8h	20.297	25.6648		ABA8h	20.297	18.1638
ABA8h	20.3088	29.7358		ABA8h	20.3088	16.4195		ABA8h	20.3088	18.2388		ABA8h	20.3088	25.6846		ABA8h	20.3088	18.1734
ABA8h	20.314	29.7628		ABA8h	20.314	16.4246		ABA8h	20.314	18.2453		ABA8h	20.314	25.689		ABA8h	20.314	18.1764
ABA12h	19.6475	29.006		ABA12h	19.6475	15.8158		ABA12h	19.6475	17.5048		ABA12h	19.6475	24.1093		ABA12h	19.6475	16.979
ABA12h	19.6542	29.2052		ABA12h	19.6542	15.8224		ABA12h	19.6542	17.6183		ABA12h	19.6542	24.2543		ABA12h	19.6542	16.9797
ABA12h	19.6581	29.212		ABA12h	19.6581	16.0931		ABA12h	19.6581	17.6668		ABA12h	19.6581	24.346		ABA12h	19.6581	16.9991
ABA24h	20.9258	29.4171		ABA24h	20.9258	16.2113		ABA24h	20.9258	18.2183		ABA24h	20.9258	24.9543		ABA24h	20.9258	16.9249
ABA24h	20.9606	29.4445		ABA24h	20.9606	16.2213		ABA24h	20.9606	18.2351		ABA24h	20.9606	24.9569		ABA24h	20.9606	16.9648
ABA24h	20.9932	29.4469		ABA24h	20.9932	16.2395		ABA24h	20.9932	18.2404		ABA24h	20.9932	24.9616		ABA24h	20.9932	17.0473
BrrLOX11	actin CT	gene CT		BrrLOX12	actin CT	gene CT		BrrLOX13	actin CT	gene CT		BrrLOX14	actin CT	gene CT		BrrLOX15	actin CT	gene CT
0h	20.677	28.5106		0h	20.677	31.2224		0h	20.677	28.9498		0h	20.677	29.2873		0h	20.677	29.4328
0h	20.92	28.5168		0h	20.92	31.3609		0h	20.92	29.0791		0h	20.92	29.2895		0h	20.92	29.5872
0h	20.9566	28.7598		0h	20.9566	31.5667		0h	20.9566	29.1542		0h	20.9566	29.3759		0h	20.9566	29.9147
MeJA4h	19.9389	26.1941		MeJA4h	19.9389	22.8188		MeJA4h	19.9389	27.854		MeJA4h	19.9389	25.9648		MeJA4h	19.9389	27.7744
MeJA4h	20.0657	26.2703		MeJA4h	20.0657	22.8697		MeJA4h	20.0657	27.8594		MeJA4h	20.0657	26.1074		MeJA4h	20.0657	27.9748
MeJA4h	20.5055	26.3056		MeJA4h	20.5055	22.9363		MeJA4h	20.5055	28.0626		MeJA4h	20.5055	26.1575		MeJA4h	20.5055	27.9763
MeJA8h	19.2318	26.2836		MeJA8h	19.2318	24.6486		MeJA8h	19.2318	25.7307		MeJA8h	19.2318	25.9272		MeJA8h	19.2318	27.7061
MeJA8h	19.2498	26.3047		MeJA8h	19.2498	24.9104		MeJA8h	19.2498	25.7894		MeJA8h	19.2498	26.8183		MeJA8h	19.2498	27.7399
MeJA8h	19.4522	26.9098		MeJA8h	19.4522	24.914		MeJA8h	19.4522	25.8118		MeJA8h	19.4522	27.7375		MeJA8h	19.4522	27.7414
MeJA12h	19.9866	26.1741		MeJA12h	19.9866	26.5969		MeJA12h	19.9866	29.1753		MeJA12h	19.9866	26.6509		MeJA12h	19.9866	28.0264
MeJA12h	20.1903	26.4559		MeJA12h	20.1903	26.6618		MeJA12h	20.1903	29.2218		MeJA12h	20.1903	26.8798		MeJA12h	20.1903	28.1845
MeJA12h	20.9217	26.5363		MeJA12h	20.9217	26.749		MeJA12h	20.9217	29.3257		MeJA12h	20.9217	27.0452		MeJA12h	20.9217	28.8854
MeJA24h	19.4591	23.7035		MeJA24h	19.4591	22.9144		MeJA24h	19.4591	26.6406		MeJA24h	19.4591	24.4328		MeJA24h	19.4591	26.5736
MeJA24h	19.4641	23.7139		MeJA24h	19.4641	22.9504		MeJA24h	19.4641	26.7285		MeJA24h	19.4641	24.4619		MeJA24h	19.4641	26.5942
MeJA24h	19.7003	23.7257		MeJA24h	19.7003	22.9987		MeJA24h	19.7003	26.7399		MeJA24h	19.7003	24.5181		MeJA24h	19.7003	26.8273
SA4h	18.9158	23.4608		SA4h	18.9158	24.8832		SA4h	18.9158	26.8467		SA4h	18.9158	25.8717		SA4h	18.9158	27.3849
SA4h	19.4441	23.816		SA4h	19.4441	24.9547		SA4h	19.4441	26.9533		SA4h	19.4441	25.8844		SA4h	19.4441	27.4637
SA4h	19.763	23.9298		SA4h	19.763	25.0313		SA4h	19.763	26.9551		SA4h	19.763	25.9366		SA4h	19.763	27.7553
SA8h	19.6039	22.3008		SA8h	19.6039	22.7332		SA8h	19.6039	29.5745		SA8h	19.6039	25.7982		SA8h	19.6039	27.4534
SA8h	19.8781	22.3146		SA8h	19.8781	22.7407		SA8h	19.8781	29.5847		SA8h	19.8781	25.8013		SA8h	19.8781	27.4545
SA8h	19.9231	22.3198		SA8h	19.9231	22.7427		SA8h	19.9231	29.5889		SA8h	19.9231	26.7907		SA8h	19.9231	27.4602
SA12h	18.9665	23.1351		SA12h	18.9665	22.4754		SA12h	18.9665	26.3395		SA12h	18.9665	25.9521		SA12h	18.9665	26.6929
SA12h	19.1018	23.1555		SA12h	19.1018	22.4784		SA12h	19.1018	26.3449		SA12h	19.1018	25.9605		SA12h	19.1018	26.6933
SA12h	19.1089	23.1706		SA12h	19.1089	22.4888		SA12h	19.1089	26.373		SA12h	19.1089	25.9611		SA12h	19.1089	26.7086
SA24h	20.3771	22.5547		SA24h	20.3771	22.6311		SA24h	20.3771	28.29		SA24h	20.3771	26.9653		SA24h	20.3771	30.3253
SA24h	20.3813	22.5577		SA24h	20.3813	22.6377		SA24h	20.3813	28.3337		SA24h	20.3813	26.9694		SA24h	20.3813	30.3275
SA24h	20.3869	22.5652		SA24h	20.3869	22.6475		SA24h	20.3869	28.4926		SA24h	20.3869	26.9733		SA24h	20.3869	30.337
ABA4h	20.2962	23.8024		ABA4h	20.2962	27.3086		ABA4h	20.2962	25.1439		ABA4h	20.2962	25.8429		ABA4h	20.2962	27.738
ABA4h	20.2964	23.8053		ABA4h	20.2964	27.318		ABA4h	20.2964	25.1457		ABA4h	20.2964	25.8433		ABA4h	20.2964	27.7408
ABA4h	20.3019	23.8162		ABA4h	20.3019	27.322		ABA4h	20.3019	25.1549		ABA4h	20.3019	25.8599		ABA4h	20.3019	27.744
ABA8h	20.297	21.9364		ABA8h	20.297	23.8004		ABA8h	20.297	26.6403		ABA8h	20.297	26.6036		ABA8h	20.297	27.5227
ABA8h	20.3088	21.9433		ABA8h	20.3088	23.8062		ABA8h	20.3088	26.652		ABA8h	20.3088	26.6168		ABA8h	20.3088	27.5413
ABA8h	20.314	21.9497		ABA8h	20.314	23.8165		ABA8h	20.314	26.6522		ABA8h	20.314	26.6171		ABA8h	20.314	27.5547
ABA12h	19.6475	21.8695		ABA12h	19.6475	22.5395		ABA12h	19.6475	27.2554		ABA12h	19.6475	25.9669		ABA12h	19.6475	27.1934
ABA12h	19.6542	21.8896		ABA12h	19.6542	22.5466		ABA12h	19.6542	27.3049		ABA12h	19.6542	25.9856		ABA12h	19.6542	27.3879
ABA12h	19.6581	21.8939		ABA12h	19.6581	22.5486		ABA12h	19.6581	27.4907		ABA12h	19.6581	26.0572		ABA12h	19.6581	27.9362
ABA24h	20.9258	22.2858		ABA24h	20.9258	23.3688		ABA24h	20.9258	26.8446		ABA24h	20.9258	26.5473		ABA24h	20.9258	29.019
ABA24h	20.9606	22.518		ABA24h	20.9606	23.3792		ABA24h	20.9606	26.8515		ABA24h	20.9606	26.5474		ABA24h	20.9606	29.0353
ABA24h	20.9932	22.5894		ABA24h	20.9932	23.3805		ABA24h	20.9932	26.8611		ABA24h	20.9932	26.5515		ABA24h	20.9932	29.0774
